# Supplementary material
Source: PubMed Central journal article supplement (PMC4872871)
Supplement: NIHMS543230-supplement-2_si_002.pdf [file NIHMS543230-supplement-2_si_002.pdf]

For landing assay, the strands left out to form the hole are: 6-5, 6-6, 7-5, 7-6, 8-5, 8-6.

For super-resolution assay, four strands are modified with a handle at 3' end (TTGGAAGGGATGGAGGA) to be complementary to a biotin strand TCCTCCATCCCTTCC and the modified strands substitute strands 2-1, 2-15, 24-1 and 24-15 of the original mixture for the rectangle structures of respective motifs; 12 strands are modified with a handle at 3' end (TTATCTACATA) to be complementary to the PAINT strand (TATGTAGATC) and the modified strands substitute strands 1-1, 1-2, 1-3, 1-13, 1-14, 1-15, 25-1, 25-2, 25-3, 25-14 and 25-15 (or 1-1, 1-2, 1-3, 1-12, 1-13, 1-14, 25-1, 25-2, 25-3, 25-12, 25-13, 25-14 for motif 0) of the original mixture for the rectangle structures of respective motifs.

Motif 0 (10H×11T)

| Name | Sequence                                      |
|------|-----------------------------------------------|
| 1-1  | TCCGCCGTCCGGCGTCTCGGGA                        |
| 1-2  | ACTTGTACCAAGAGGCCAGTG                         |
| 1-3  | GTCTGTGCCCTAGCTGCATCG                         |
| 1-4  | CGTAGACGTTAAGACCTCGGA                         |
| 1-5  | AGGTGGTTTATACGGACTGTA                         |
| 1-6  | GGACTATGCGTTTTTTTTTTTTT                       |
| 2-1  | TTTTTTTTTTTGCCCAATGCGTCCGACGGCGGATTTTTTTTTTT  |
| 2-2  | GTGCAGCAAGTCCGTTAACCATTGGTACAAGTTCCCGAGACG    |
| 2-3  | GAATGAACTAGGGATAATAAGAGGGCACAGACCACTGGCCTC    |
| 2-4  | ACCGACTAAATGATTGAGTCCTAACGTCTACGCGATGCAGCT    |
| 2-5  | TACAAAGTTCAACCATAGACGATAAAACCACCTTCCGAGGTCT   |
| 2-6  | TGGGATAGTAGACACCTGCCCACGCATAGTCCACAGTCCGT     |
| 3-1  | AGTTATCCCTCATCGGTTACTCTTGCTGCACACGCATTGGGC    |
| 3-2  | TAGAAGGGCCCTCAAGATGCATAGTTCATTCTGGTTAACGGA    |
| 3-3  | ATGCGGGCCTAGCATGTAAGCTTTAGTCGGTCTTATTATCCC    |
| 3-4  | TCCGTAAATTTAGTTTAGGACGAACTTTGTAGGACTCAATCA    |
| 3-5  | GTTTACTGCACCAACTTGAAGTACTATCCACGTCTATGGTT     |
| 3-6  | ACTCGCAGCACTTTTTTTTTTTTTTTTTTTTTTTGGGCAGGTGTC |
| 4-1  | TTTTTTTTTTTTCACGTGGGCATGAGGGATAACTTTTTTTTTTTT |
| 4-2  | CGAGTCCGCGAGGTCCGAATCGGGCCCTTCTAAGTAACCGAT    |
| 4-3  | CGCGCCAACGGGTGGAGCTGTTAGGCCCGCATTCATCTTGA     |
| 4-4  | CCATCGCGCCCTAAGTGTATGAAATTTACGGAGCTTACATGC    |
| 4-5  | GGTACCGGACCGTGGTCCACCGGTGCAGTAAACGTCCATAAAT   |
| 4-6  | AGGTAATCTAATAGCAGCAGTGTGCTGCGAGTCTTCAAGTTG    |
| 5-1  | ACATAGCGAGTCAAACGGTGACGCGGACTCGATGCCCACGTG    |
| 5-2  | ATGGGCGGGCCGGTCACAAGTCGTTGGCGCGGATTCGGACCT    |
| 5-3  | CCGGAGCCCTAAGTCCGAGGTGGCGCGATGGACAGCTCCACC    |
| 5-4  | AAGGATCTGGAGGAAGTTCAGTCCGGTACCCATACACTTAG     |
| 5-5  | TTAGGGAAATAAAGGATTGACTAGATTACCTCGGTGACCACG    |
| 5-6  | TCAGCGCTTCATTTTTTTTTTTTTTTTTTTTTTTACTGCTGCTAT |
| 6-1  | TTTTTTTTTTTGTATCTGCACAACCTCGCTATGTTTTTTTTTTTT |
| 6-2  | CCGCATGATCCGCAAGAGCTTGGCCCGCCATTCACCGTTTG     |
| 6-3  | AGTGCTTATGACCCTAAATTGTAGGGCTCCGGACTTGTGACC    |
| 6-4  | CGTCAGAAAGATAAAGAGGGCTCCAGATCCTTACCTCGGACT    |
| 6-5  | CATACGCTGTCCCTAACGTTATATTTCCCTAATGGAACCTTCC   |
| 6-6  | GCCAATCCAGGTTTAAAGAGATGAAGCGCTGAGTCAATCCTT    |
| 7-1  | TATTTGGCATCTGACTATAGGGATCATGCGGTGTGCAGATAC    |
| 7-2  | GTACGCCCTGACCCACCGATGCATAAGCACTAAGCTCTTGCG    |
| 7-3  | GTTAAAGGCGTTCCGCGAAATTCCTTCTGACGCAATTTAGGGT   |

7-4 CCTTTGACTTTTCACTGAACAGACAGCGTATGGCCCTCTTTAT  
7-5 GCCCTGACGGGAGCTGCGGGCCTGGATTGGCTAACGTTAGGG  
7-6 GACGTTGAATTTTTTTTTTTTTTTTTTTTTTTTCTCTTTAAAC  
8-1 TTTTTTTTTTACAGAAAGGTCGATGCCAAATTTTTTTTTTT  
8-2 TGGCGGTTGGATTAATTAGGCTCAGGGCGTACCCTATAGTCA  
8-3 AATCCCTGTGGCTACCGAGGCACGCCTTTAACCATCGGTGGG  
8-4 AACTGAAGCGGCTTGGCCACTAAAGTCAAAGGAATTTTCGCGA  
8-5 ACCGTGACGCAACTAAACAATCCCGTCAGGGCCTGTTCAGTG  
8-6 GGACTCTATCCCTACGGAACCAATTCAACGTCGCCCGCAGCT  
9-1 GGGACCCTTCACTAACGACCACCAACCGCCAGACCTTCTGT  
9-2 GCCTGATATTGCAATCACTCCCACAGGGATTGCCTAATTAAT  
9-3 GGGTACCGACTCCCTTTACGGCGCTTCAAGTTGCCTCGGTAGC  
9-4 CTTCCGAGAAGTCATTTGGAAGCGTCACGGTAGTGGCCAAGC  
9-5 GTCTCAGGGCGCTTGAGAATGAGATAGAGTCCATTGTTAGTT  
9-6 TCGAACACTTCTTTTTTTTTTTTTTTTTTTTTTTGGTTCCGTAGG  
10-1 TTTTTTTTTTTCACATAGGCCGTGAAGGGTCCCTTTTTTTTTTT  
10-2 CCCACCTAGAAGAAGAAAGGGCAATATCAGGCTGGTCGTTAG  
10-3 TAGAACTGAGAGACAGGGCTAAGTCGGTACCCGGAGTGATTG  
10-4 TATAGCGCGTCTGTGGCGCGACTTCTCGGAAGCCGTAAAGG  
10-5 CTGGCGGTACCATAAACTCGCGCGCCTGAGACTTCCAAATGA  
10-6 ATTTCCCTGACCTTGAGGGAGGAAGTGTTCGATCATTTCTCAA  
11-1 TCTAGGTGGGCGGCCTATGTG  
11-2 CTCAGTTCTACCCTTTCTTCT  
11-3 ACGCGCTATATAGCCCTGTCT  
11-4 GTACCGCCAGTCGCGCCACAG  
11-5 TCAGGGAAATGCGAGTTTATG  
11-6 TTTTTTTTTTCTCCCTCAAGG

Motif 1 (10H×11T)

| Name | Sequence                                      |
|------|-----------------------------------------------|
| 1-1  | GCCGGTGTCATAGGACCAGAG                         |
| 1-2  | GCCTCAACGGCTTTAGCACGT                         |
| 1-3  | AACAGAGAGGTACTCCAAAGA                         |
| 1-4  | ACTTAGTTACCGGCTCGTTGA                         |
| 1-5  | GTGTAAAGCTGGCGGTGACGC                         |
| 1-6  | GGTTACAGATACTTTTTTTTTT                        |
| 2-1  | TTTTTTTTTTTTGCCATTGAGCTATGACACCGGCTTTTTTTTTT  |
| 2-2  | GAGACGGCGTCGTCGGCGAACAGCCGTTGAGGCCCTCTGGTCC   |
| 2-3  | CTGGGCGGATGTTACAGTGCCTACCTCTCTGTTACGTGCTAA    |
| 2-4  | TCCGATTGCTAGACGCATTGTCGGTAACTAAGTTCCTTTGGAG   |
| 2-5  | CAACATCTGCAGCAGCTGTAGCCAGCTTTACACTCAACGAGC    |
| 2-6  | ATCTGCCGCGGTAGTTGCTGCGTATCTGTAACCGCGTCACCG    |
| 3-1  | CACGGAACGGCATCGAACGTGGACGCCGTCCTCGCTCAATGGC   |
| 3-2  | TCGTCCTAGGCCCTGGACTTCCATCCGCCAGGTCGCCGAC      |
| 3-3  | TTCCGGATCGACCCCTCGCCATTAGCAATCGGACGCACTGTAA   |
| 3-4  | TTACCTAGAAATACCCGATGATGCAGATGTTGACAATGCGTC    |
| 3-5  | GAAGCTGGCAAGGTTGCTATAACCGCGGCAGATCTACAGCTGC   |
| 3-6  | CGGGAAGATGGATTTTTTTTTTTTTTTTTTTTTTTGAGCAACTA  |
| 4-1  | TTTTTTTTTTTTTGGTTTCGAGATGCCGTTCCGTGTTTTTTTTT  |
| 4-2  | GATTAGAGCATAATCTCTTTTCGGCCTAGGACGACACGTTCTGA  |
| 4-3  | GCTGAGGTGTGCCGAGAAACAGTCGATCCGGAAGAAGTCCAG    |
| 4-4  | TCTAGGAAACCCGGATATGTGATTTCTAGGTAAATGGCGAGG    |
| 4-5  | CGGCAGTTTAAAGACCTGCTCTCTTGCCAGCTTCTCATCGGGT   |
| 4-6  | GAACAAATATCTACACCCTATTCCATCTTCCGTATAGCAAC     |
| 5-1  | GGTCGGATCACTCCCGCCAACATGCTCTAATCTCTCGAAACC    |
| 5-2  | GAACTCGTCTCCGCTCAGGGTCACACCTCAGCGAAAGAGATT    |
| 5-3  | CTAATAATAAGCGTGCCTAGCGGTTTCCTAGATGTTTCTCGG    |
| 5-4  | TGAGCAAAGCAGACACAAAGGTTAAACTGCCGCACATATCCG    |
| 5-5  | ACCATCACCCCTACGATTCTCAGATATTTGTTTCAGAGCAGGTC  |
| 5-6  | TAGCAAACCTCAGTTTTTTTTTTTTTTTTTTTTTATAGGGTGTA  |
| 6-1  | TTTTTTTTTTTTTCTAGCTCACCAGTGATCCGACCTTTTTTTTTT |
| 6-2  | ACTTCACTATTTAAGGTGTTGGGAGACGAGTTCGTTGGCGGG    |
| 6-3  | ATTTAGACTAGTCGCCTGGATGCTTATTATTAGACCCCTGAGC   |
| 6-4  | CAGAAAGTGAGGGCCTCAGGTCGCTTTGCTCAGCTAGGCAC     |
| 6-5  | GGTCAGGTCAACGGTCATCTCTAGGGTGATGGTCCCTTTGTGT   |
| 6-6  | AAAGCTCGGATTAGCGCCCGGCTGAGTTTGCTATGAGAAATCG   |
| 7-1  | TTGCACGACCGTATCGTCTCTAATAGTGAAGTGGTGAGCTAG    |
| 7-2  | ACTTACAACGCCTGAAATAAGCTAGTCTAAATCAACACCTTA    |
| 7-3  | AATAATTACCTCACATACGCTCTCACTTTCTGATCCAGGCGA    |

7-4 CTGGTCATCTCAGAATGAGAATTGACCTGACCACCTGAGGCC  
7-5 TAGCGTGAATGGATGAGACGCATCCGAGCTTTGAGATGACCG  
7-6 GTCACTCAAGTCTTTTTTTTTTTTTTTTTTTTTTCCGGGCGCTA  
8-1 TTTTTTTTTTTGGACATTCCCTACGGTCGTGCAATTTTTTTTTT  
8-2 TGCGAAGGCCGAAGCTGGCAGGGCGTTGTAAGTAGAGACGAT  
8-3 TGCAGGCGGGCCAAAGGATAAGAGGTAATTATCTTATTTCA  
8-4 GCTTCCGTTGCTGATGCCATTTGAGATGACCAGAGCGTATGT  
8-5 CAGGCGAAATCAGCGTTGGCTCCATTCACGCTATCTCATTC  
8-6 AGCGCTGGAGGGCTCAATGTTGACTTGAGTGACGCGTCTCAT  
9-1 AATCTCCCACGCATTGGACCTCGGCCTTCGCAAGGAATGTCC  
9-2 TCAGTGTATACCGACTGTAAAGCCCCGCCTGCACTGCCAGCTT  
9-3 GCCTTCGCACAGTGGTCTGACGCAACGGAAGCTTATCCTTTG  
9-4 GTCTAGGTATCCCTGCTGGGAGATTTGCCTGAATGGCATCA  
9-5 GCCGGAATTTGCTAGCATTTACCTCCAGCGCTAGCCAACGCT  
9-6 ATTACCTTTATTTTTTTTTTTTTTTTTTTTTTTAACATTGAGC  
10-1 TTTTTTTTTTTCTGTCTCGTAGCGTGGGAGATTTTTTTTTTTTT  
10-2 TAGTAAACTCCAAGGCTACCCGGTATACACTGAAGGTCCAAT  
10-3 TGTAAGTCGATTAAACCACTGCTGTGCGAAGGCTTTACAGTC  
10-4 CAGAAATATTGAACTGTGATTGGATACCTAGACGTCAGACCA  
10-5 TGAGAGCTCTGATGAATTCGCGCAAATTCGGCTCCCAGCAG  
10-6 TTTCCCTAGTTGAATATCCACGAATAAAGGTAATTAAATGCTA  
11-1 GGAGTTTACTATACGAGACAG  
11-2 ATCGACTTACAGGGTAGCCTT  
11-3 CAATATTTCTGCAGTGGTTTA  
11-4 CAGAGCTCTCAAATCACAGTT  
11-5 CAACTAGGAAAGCGAATTCAT  
11-6 TTTTTTTTTTTTCGTGGATATT

Motif 2 (10H×11T)

| <b>Name</b> | <b>Sequence</b>                               |
|-------------|-----------------------------------------------|
| 1-1         | TGATTTAGGCGTCCCTCCGTCT                        |
| 1-2         | GCCCGGTTTATATATATCCTCGT                       |
| 1-3         | TGTATCCCTCATATTCGGCCG                         |
| 1-4         | TGCTCGTGTGGGCCTCTATGA                         |
| 1-5         | AGCCCACAAGCCTGGTGCGAG                         |
| 1-6         | GCTAATGACGGTTTTTTTTTTT                        |
| 2-1         | TTTTTTTTTTTTTCGCAGTACGTACGCCTAAATCATTTTTTTTTT |
| 2-2         | TCGGTGAGCAAGCTGGAGGGTTATAAACCGGGCAGACGGAGG    |
| 2-3         | GCTTGGGATGAGTTATCGGATATGAGGGATACAACGAGGATA    |
| 2-4         | ACCGCTATGGAATCCCTAAGACCCACACGAGCACGGCCGAAT    |
| 2-5         | TCCATTGAATGAATTGATGCCGGCTTGTGGGCTTCATAGAGG    |
| 2-6         | AGTCCGTGAATCAGCCGCCAGACCGTCATTAGCCTCGCACCA    |
| 3-1         | TTGCTCACCGAACGTACTGCGTTAAAGCGTAAGCCAAAAGCAG   |
| 3-2         | TCATCCCAAGCACCCCTCCAGCGCTATCGCGAGTACTTGCTCT   |
| 3-3         | TCCATAGCGGTATCCGATAACTTCGTAGACTACGCATATAAT    |
| 3-4         | CATTCAATGGATCTTAGGGATCAGCGAATTCATGCTTAAATC    |
| 3-5         | ATTACAGGACTGGCATCAATTCACTGCCCTACAGCAGAGATA    |
| 3-6         | TTTTTTTTTTTTCTGGCGGCTGACAAACCGGTTTTTTTTTTTT   |
| 4-1         | TTTTTTTTTTTTCTCCCGGAACTTACGCTTTAATTTTTTTTTT   |
| 4-2         | GTAACCACTGCGCGTTACAAGACTCGCGATAGCCTGCTTTGG    |
| 4-3         | GTACACCCGACTGGGACCCGAGTAGTCTACGAAAAGAGCAAGT   |
| 4-4         | TGTATAACCGTAATATGGTTACATGAATTCGCTGATTATATGC   |
| 4-5         | AACCCACCTAGGGCCCTGAGGTGTAGGGCAGTGGATTTAAGC    |
| 4-6         | CACACAAATAGGCCGCGTCAGAACCGGTTTTGTTATCTCTGC    |
| 5-1         | GCAGTGGTTACTTCGCGGGAGTCCCCTGGCTGCGGATACGG     |
| 5-2         | GTCGGGTGTACCTTGTAACGCCTGCGTCTGCACGCGGGTAAG    |
| 5-3         | TACGGTATACATCGGGTCCCAAATGCGAGCGGGTGAATGGC     |
| 5-4         | CTAGGTGGGTGTAACCATATGAGGTTCGAGGGTTCACAGCC     |
| 5-5         | CTATTTGTGTGCCTCAGGGCCGGCCAGGGTCCAGTGCCCGTC    |
| 5-6         | TTTTTTTTTTTTCTGACGCGGCAAACTGCGAGCTTTTTTTTTTT  |
| 6-1         | TTTTTTTTTTTTTCGTCTCGCTTCAGCCAGCGGGATTTTTTTTTT |
| 6-2         | GATTAGAGACCTTATCACCCAGTGCAGACGCAGCCGTATCCG    |
| 6-3         | GCCGCATAAAGTATGATCCCACCCGCTCGCATTCCTTACCCGC   |
| 6-4         | CCAGCACGGAAAGCCTCCTAACCCCTCGAACCTCGCCATTACA   |
| 6-5         | ATTTCCTTTTCGGTTAAACTAGTGGACCCTGGCCGGCTGTGAA   |
| 6-6         | CTTGACAGTAAAGATCCGCCGAGCTCGCAGTTTGACGGGCAC    |
| 7-1         | GGTCTCTAATCAAGCGAGACGGCGCAGCGATGGAGTTGCCGC    |
| 7-2         | CTTTATGCGGCTGGGTGATAACGTTCCCAACGGGAACTCGAT    |
| 7-3         | TTCCGTGCTGGTGGGATCATAGACGCTCTGGTTGCTAGACGG    |

7-4 CGAAAGGAAATTTAGGAGGCTATTCCCTATGCGTGAATAAGTT  
7-5 TTACTGTCAAGCTAGTTTAAACGGCGTAGACCATGACCTGGTC  
7-6 TTTTTTTTTTTTCGGCCGGATCTGAGCCAGTTCCGTTTTTTTTTT  
8-1 TTTTTTTTTTTTCTAATGTTCCCATCGCTGCGCTTTTTTTTTT  
8-2 CTCGGCATGGGCGCCAAGATCCCGTTGGGAACGGCGGCAACT  
8-3 GAGAACATAGATGAATTCACGAACCAGAGCGTCATCGAGTTC  
8-4 TCATTTCTTTCTAATCCCTGCACGCATAGGAATCCGTCTAGC  
8-5 TTCAGCGGGCGGGACCAGCATATGGTCTACGCCAACTTATTC  
8-6 CCTACAGCATTAAAGGATTCACGGAACGGCTCGACCAGGTC  
9-1 CCCATGCCGAGGAACATTAGATCACGTGAGCCACGTCATTAA  
9-2 TCTATGTTCTCGATCTTGGCGTTGTGGTGTCAATCAGCTGGGA  
9-3 GAAAGAAATGACGTGAATTCATGCGTTACAGCACTGCAAGCG  
9-4 CGCCCCTGAAGCAGGGATTACGATCACGCTCCGTCCGATCT  
9-5 AATGCTGTAGGATGCTGGTCCCTTAATTGGTGTGGTAAACGA  
9-6 TTTTTTTTTTTTGAATCCTTTGTTTCGTGCAAGTTTTTTTTTTT  
10-1 TTTTTTTTTTTTGGGATGCGCCTGGCTCACGTGATTTTTTTTTTT  
10-2 CGAGTCCCAAGGCTACTTCTAATGACACCACAATTAATGACG  
10-3 GAGACACCCGTAATGACGTGCTGTAACGCATCCCAGCTG  
10-4 AGACACCCGATCGTGATTTATGGAGCGTGATCGCGCTTGCAG  
10-5 AACTTCGGCGAGCCCGTAATCAACACCAATTAAGATCGGAC  
10-6 CGTAGCAGTCACCTGCGCTTGACTTGCACGAACTCGTTTACC  
11-1 CTTGGGACTCGGGCGCATCCC  
11-2 ACGGGTGTCTCTAGAAGTAGC  
11-3 ATCCGGTGTCTCGTCAATAGT  
11-4 TCGCCGAAGTTATAAATCACG  
11-5 TGACTGCTACGGAGTACGGGC  
11-6 TTTTTTTTTTTTCAAGCGCAGG

Motif 3.1 (10H×11T)

| <b>Name</b> | <b>Sequence</b>                              |
|-------------|----------------------------------------------|
| 1-1         | ATTGTTTAGTAGAAGTAGCGA                        |
| 1-2         | CTTTATTTACGGACCGGCTG                         |
| 1-3         | AGAAAGGAGTAAATGTCCGAC                        |
| 1-4         | GACCCTACATACCGAATTGGA                        |
| 1-5         | ACGAGTATGTGGACGGGCAGC                        |
| 1-6         | TTTTTTTTTTGGCTTTAGTTCT                       |
| 2-1         | TTTTTTTTTTTCGCTACTTCTATTCCGTTGCCTTGAGTATAAA  |
| 2-2         | CTAAACAATCAGGCCGGTCCGCGATTTGTTCCGCCCTCTTTA   |
| 2-3         | TAAATAAAGGTCCGACATTTACACAACCGATCAGAACTGCGC   |
| 2-4         | CTCCTTTCTTCCAATTCGGTAAGTGCTGGGCGTAACCCGGGT   |
| 2-5         | TGTAGGGTTCGCTGCCCGTCCAAACGGTTACGACTTTATCGGT  |
| 2-6         | CATACTCGTAGAACTAAAGCCAAAGGGCAATGTTTTTTTTTT   |
| 3-1         | AAGATTAACCTACCTAGCTAAGGCAACGGAATTTTTTTTTTT   |
| 3-2         | TCAGATCAGCCCTCTGGTTACCGAACAAATCGTTTATACTCA   |
| 3-3         | CGTTTCGAAAGCCCGCGATGTGATCGGTTGTGTAAGAAGGC    |
| 3-4         | TGACCCTAAGGAAACGGGAATCGCCAGCACTGCGCAGTTCT    |
| 3-5         | CACGGAAAGATTTACATAGTGTGTAACCGTTACCCGGGTTA    |
| 3-6         | TTTTTTTTTTGTACGGTGCATGCATTGCCCTTTACCGATAAAG  |
| 4-1         | TTTTTTTTTTTAGCTAGGTAGAATGGACGCGGTCCGAGGGCCC  |
| 4-2         | GTTAATCTTGTAACCAGAGGGTGAGACGTTGCTGGTTCCGAA   |
| 4-3         | CTGATCTGAACATCGCGGGCTACATGTTATAGACGCGGCCCA   |
| 4-4         | TTCGAAACGATTCCCGTTTCCATTGATGGGTTCAACCGTCTG   |
| 4-5         | TTAGGGTCACACTATGTAAATAGTCAGACGAAGGAGTTAGAT   |
| 4-6         | CTTTCCGTGCATGCACCGTACTCTTCCGGCGCTTTTTTTTTTT  |
| 5-1         | CCATTACGACAAGATTGGTGAACCGCGTCCATTTTTTTTTTTT  |
| 5-2         | AAAGCGCCAGACCCTCGTTGGGCAACGTCTCAGGGCCCTCGG   |
| 5-3         | CTTAGACCAGTCGCGATATACTATAACATGTTTCGGAACCA    |
| 5-4         | ACGCGATGCGTCTCTAGGGTTAACCATCAATFGGGCCGCGT    |
| 5-5         | CCCATTATTACGAATAACGGCTTCGTCTGACTCAGACGGGTG   |
| 5-6         | TTTTTTTTTTATAGAGAGGTGGGCGCCGGAAGAATCTAACTCC  |
| 6-1         | TTTTTTTTTTTACCAATCTTGCCGACCAAGATCTTGATATTA   |
| 6-2         | TCGTAATGGCCAACGAGGGTCACGTCGCCATCTCATACTCCA   |
| 6-3         | TGGCGCTTTGTATATCGCGACAGCTCAAAGCCCACGGAAATC   |
| 6-4         | TGGTCTAAGAACCCTAGAGACGGGACGCTCATTTGGTTCAATTA |
| 6-5         | GCATCGCGTGCCGTTATTTCGTGTTTAGACAACACGATGCATG  |
| 6-6         | AATAATGGGCCACCTCTCTATGTATGCCTTTGTTTTTTTTTTT  |
| 7-1         | CGCGGGCGCTCCCGTATTTATATCTTGGTCGGTTTTTTTTTTT  |
| 7-2         | CGGGCTTGGACGTGTGCCCTGGATGGCGACGTTAATATCAAG   |
| 7-3         | CCACCGCAGATCGGGCAGATGGGCTTTGAGCTTGAGATATGA   |

7-4 CTGGTATGAGCCGACGAGGGAATGAGCGTCCCGATTTCCGTG  
7-5 GCGTTGCCGGAACAGGACGGCGTTGTCTAAACTAATGAACCA  
7-6 TTTTTTTTTCCGATATCATCACAAAGGCATACCATGCATCGT  
8-1 TTTTTTTTTATAAATACGGGAAGAGACAGTATGTTTATACCA  
8-2 GCGCCCGCGCAGGGCACACGTACGGCAATTCGAAGAGGAACA  
8-3 CCAAGCCCGCATCTGCCCGATCGATAACGGGCCCAATAATGC  
8-4 CTGCGGTGGTCCCTCGTCCGCATGTCCACAAACCCATCATTG  
8-5 TCATACCAGGCCGTCTGTTCACGCTGACGAACCCGCTGGTT  
8-6 CGGCAACGCTGATGATATCGGTGCGAAAGTTCTTTTTTTTTTT  
9-1 AGATGGCTAAGCAATAAGCGTATACTGTCTCTTTTTTTTTTTT  
9-2 GGCCTTAAAGACCGTGTCTGCCGAATTGCCGTTGGTATAAAC  
9-3 GTCTACGGGCTCGTATGCAGCGCCCGTTATCGTGTTCCTCTT  
9-4 GAAACTGTTACTGCGCAGCCCTTTGTGGACATGCATTATTGG  
9-5 CTAGGTCTCCACCGAGGGTCGTTTCGTCAGCGTCAATGATGGG  
9-6 TTTTTTTTTTAAAGTGAGGGATTGAACTTTCGCAAACCAGCGGG  
10-1 TTTTTTTTTTACGCTTATTGCTGTACGCCTCCATAATTGCGAC  
10-2 TAGCCATCTGCAGACACGGTCTGAAGCCGAGCATGGATGCTA  
10-3 TTTAAGGCCCGCTGCATACGAGCAGTGC GGCTTTGCGATCATT  
10-4 CCCGTAGACGGGCTGCGCAGTTATAATGTTGACCACTGCTCA  
10-5 AACAGTTTCCGACCCCTCGGTGTTGCTTAAAGCGTGTGGCGTGC  
10-6 GAGACCTAGAATCCCTCACTTTCTGCTTGGTTTTTTTTTTTTT  
11-1 TGGAGGCGTACTTTTTTTTTTTT  
11-2 GCTCGGCTTCAGTCGCAATTA  
11-3 AAGCCGCACTGTAGCATCCAT  
11-4 TCAACATTATAAATGATCGCA  
11-5 CGCTTAAGCAATGAGCAGTGG  
11-6 AACCAAGCAGAGCACGCCACA

Motif 3.2 (10H×11T)

| Name | Sequence                                     |
|------|----------------------------------------------|
| 1-1  | ATACAACACCGCCAAACACGC                        |
| 1-2  | GGGCGACCGCATACTGTGTAT                        |
| 1-3  | CCAGGTACGATGAGTAGTTGT                        |
| 1-4  | TAATTTGGTACGCGCATTCAA                        |
| 1-5  | GTCCACGGCGGCTAATAAGTT                        |
| 1-6  | TTTTTTTTTTTGTTCCTCGTCAT                      |
| 2-1  | TTTTTTTTTTTGGCGTGTGGCGATTTGACTAACCTGTGTGAG   |
| 2-2  | GGTGTGTATATACACAGTATTCATGATATCTCATAGGGCCT    |
| 2-3  | GCGGTCGCCCACAACACTACTCAGCATTGGGCGGTTGGGCTACC |
| 2-4  | TCGTACCTGGTTGAATGCGCGAGGCCTCCGCCTAAGTAGATT   |
| 2-5  | TACCAAATTAACCTTATTAGCGTGGTTGACGCAATTTTCGAGA  |
| 2-6  | CGCCGTGGACATGACGAGAACATGGGAATGGCTTTTTTTTTTT  |
| 3-1  | GCTGCTATATCCCTGCTTCTCTTAGTCAAATCTTTTTTTTTTT  |
| 3-2  | ACCTTTCTGCAGAAAGTGATCAGATATCATGACTCACACAGG   |
| 3-3  | CAGGTGGAAGGGCCAAAGAATCCGCCCAATGCAGGCCCTATG   |
| 3-4  | AGCCAAACTGCTTGCATGATGGGCGGAGGCCTGGTAGCCCAA   |
| 3-5  | ATACTGGTTTGTTCAGCCGTGGCGTCAACCACAATCTACTTA   |
| 3-6  | TTTTTTTTTTTCGAGTAGTCTGGCCATTCCCATTTCTCGAAATT |
| 4-1  | TTTTTTTTTTTGAGAAGCAGGGACTCACGGATGCTTAGGACCC  |
| 4-2  | ATATAGCAGCGATCACTTTCTAAGCTCATCCTCATTATCAAT   |
| 4-3  | GCAGAAAGGTATTCTTTGGCCTTACATGAGCGTGGACCAACT   |
| 4-4  | CTTCCACCTGCATCATGCAAGGCAAACGCTCGCGTACGACAC   |
| 4-5  | CAGTTTGGCTCACGGCTGAACAGTTATTTGTACTCGGTATAG   |
| 4-6  | AAACCAGTATCAGACTACTCGAGCTCCAACCTTTTTTTTTTT   |
| 5-1  | ACGGCAGGATGATCTGTGATTCATCCGTGAGTTTTTTTTTTTT  |
| 5-2  | TGGCGCCAGCACGCGGTACTTAGGATGAGCTTGGGTCCTAAG   |
| 5-3  | ACCGACGTTCTTCGACTGCTACGCTCATGTAAATTGATAATG   |
| 5-4  | AGACAGTGTGCTGACATAATTCGAGCGTTTGCAGTTGGTCCA   |
| 5-5  | TATCACGTGATGATGTAAACGTACAAATAACTGTGTTCGTACG  |
| 5-6  | TTTTTTTTTTTAGCTAGATCACGGGTTGGAGCTCTATACCGAG  |
| 6-1  | TTTTTTTTTTAATCACAGATCAGTTCCCTACTAGGGCACCAGT  |
| 6-2  | ATCCTGCCGTAAGTACCGCGTGAGCGTGCCAGTCGGACTGGG   |
| 6-3  | GCTGGCGCCATAGCAGTCGAAAGACAGTATCTCTACCCGTAG   |
| 6-4  | GAACGTCCGTAATTATGTCAGCGCCCGTGGAGGATGATTCAT   |
| 6-5  | CACACTGTCTCGTTTACATCAGAATTCGCCGCAAGCGGGCCG   |
| 6-6  | TCACGTGATAGTGATCTAGCTACAAGCGCTGATTTTTTTTTTT  |
| 7-1  | TTGAACGATAATCAATGGAAGTAGTAGGAACTTTTTTTTTTTT  |
| 7-2  | CCGTTCTGCTGCAACCGCCGGCTGGCACGCTCACTGGTGCCC   |
| 7-3  | ACTCCGCGTAGATCCAAAGATAGATACTGTCTCCAGTCCGA    |

7-4 AATGACCGCTCCACACGCTCACTCCACGGGCGCTACGGGTAG  
7-5 CTTCAAGGATCCTATTTCTCCGCCGGAATTCATGAATCATC  
7-6 TTTTTTTTTTTCGACTCTCGGATCAGCGCTTGTTCGGCCCGCTT  
8-1 TTTTTTTTTTCTTCCATTGATATATGCCTAATACTGAACGTT  
8-2 TATCGTTCAACCGCGGTTGCGTGGTACTCTTATAACCTCGC  
8-3 AGCAGAACGGATCTTTGGATCAAACGACTCGAATCAAAGGCT  
8-4 TACGCGGAGTTGAGCGTGTGGGTCTTGTGTCCGCTAATATG  
8-5 AGCGGTCAATTGGAGAAATAGGGTCTATTCTGAACTCTAGTAG  
8-6 ATCCTTGAAGTCCGAGAGTCGCGCCGAGCGATTTTTTTTTTTT  
9-1 CTCATTTACCTACCATAATATATTAGGCATATTTTTTTTTTTT  
9-2 AATAGTGAGGCACGCTTCATTAAGAGTACCACAACGTTTCAGT  
9-3 GATATTTAAACGTCCGCTCCCTCGAGTCGTTTTCGAGGGTAT  
9-4 CATCCCGGCAGCATAAGAGGAGGACACAAGACAGCCTTTGAT  
9-5 ACGCCTACAGGCGCCTTACTGTCAGAATAGACCATATTAGCA  
9-6 TTTTTTTTTTAAATGCACAACGATCGCTCGGCGCTACTAGAGT  
10-1 TTTTTTTTTTTATATTATGGTAGGACCGCTGTAACTTTACTAA  
10-2 GGTAAATGAGAATGAAGCGTGAGCAGGATGAATTCAAAGTCG  
10-3 CCTCACTATTGGGAGCGGACGTCTTCTCATGTTGCTTGTGGG  
10-4 TTTAAATATCTCCTCTTATGCCGGCAAACGAACTGGGCTGC  
10-5 TGCCGGGATGCAGTAAGGCGCCGTCTCCGGTTCACCTTACGT  
10-6 CTGTAGGCGTCGTTGTGCATTCCCTCTAGCATATTTTTTTTTTT  
11-1 TACAGCGGTCCTTTTTTTTTTT  
11-2 TTCATCCTGCTTTTAGTAAAGT  
11-3 ACATGAGAAGACGACTTTGAA  
11-4 TCAGTTTGCCGCCCAAGCA  
11-5 ACCGGAGGACGGCAGCCCAGT  
11-6 TATGCTAGAGGACGTAAGTGA

Motif 4.1 (10H×11T)

| Name | Sequence                                          |
|------|---------------------------------------------------|
| 1-1  | ACTAAGCACTTTTTTTTTTTTT                            |
| 1-2  | TGTATAGTATCCAGCAGCTTA                             |
| 1-3  | CATCGTTACCGAGATTGATGG                             |
| 1-4  | GGACTAGACCGTTAACCAGTT                             |
| 1-5  | AATTCAAGCGTAGCCATCCTC                             |
| 1-6  | TGGAGTTTCACCTGATGTTTCG                            |
| 2-1  | AGTGCTTAGTTAAGCTGCTGGGCTGCTGGATCGGCATGTAG         |
| 2-2  | ATACTATACACCATCAATCTCAGAAAGACTTTGACGATACTC        |
| 2-3  | GGTAACGATGAACTGGTTAACTCGCGCGAGCGACCCTCAGTG        |
| 2-4  | GGTCTAGTCCGAGGATGGCTAACTATTATTTATGGACCGAAA        |
| 2-5  | CGCTTGAATTGCAACATCAGGGTATGCTCCCTACTGAAAATAG       |
| 2-6  | TGAAACTCCATTTTTTTTTTTTTTCCCTCAGCTTTTTTTTTTTTTTT   |
| 3-1  | TCCAGCAGGCTTTTTTTTTTTTTTACCGTTTGTTTTTTTTTTTTTTT   |
| 3-2  | AAGTCTTCTCTACATGCCGACTTTAACCTAGATGCTCATTC         |
| 3-3  | GCTCGCGGAGAGTATCGTCATGCTTAATACGAATCCTGACT         |
| 3-4  | AAATAATAGTCACTGAGGGTCTTCCCATCAAGTGGTTTGCCA        |
| 3-5  | GGGAGCATACTTTCGGTCCATTTCCCGTACAGAGGTACGAGGT       |
| 3-6  | AAAGCTGAGGCTATTTTTCAGTATAGCCATACTCGAAGGTCTTA      |
| 4-1  | ACAAACGGTAGAATGAGCATCCAGGGCGTGAGCCCTTGAGTT        |
| 4-2  | TAGGTTAAAGAGTCAGGATTCAGACATAGCGTCCGCGATCAG        |
| 4-3  | GTATTAAGCATGGCAAACCACGCCAGTATGTAAATCCCGGGC        |
| 4-4  | TTGATGGGAAACCTCGTACCTCGGCTCGGCCAGTGGTCAAG         |
| 4-5  | CTGTACGGGATAAGACCTTTCGGTGGTAGCCCACCACCTCGCCT      |
| 4-6  | AGTATGGCTATTTTTTTTTTTTTTCCCGACCACTTTTTTTTTTTTTTT  |
| 5-1  | TCACGCCCTGTTTTTTTTTTTTTCTTACACTCATTTTTTTTTTTTTTT  |
| 5-2  | CGCTATGTCTAACTCAAGGGCCAGTTACGTAAATCCGCGCAA        |
| 5-3  | ACATACTGGCCTGATCGCGGACCATAGACCATCGGACCCGCA        |
| 5-4  | GGCCGAGCCGGCCCGGATTTATTCTGCTGCTCAGATCAGA          |
| 5-5  | GGGCTACCACCTTGACCACTGCTTAGATTTATGTGTTTCGTAC       |
| 5-6  | AGTGGTCCGGAGGCGAGTGGTATGAGTGGCACATCGCATTTA        |
| 6-1  | TGAGTGTAGGTTGCGCGGATTGACCCATGTGCGCACGACTCC        |
| 6-2  | TACGTAACGTGTCGGGTCCGATCCCGTCTGAGTCTATTCATC        |
| 6-3  | TGGTCTATGGTCTGATCTGAGAGTGCACCTCAAGCAAAGTTG        |
| 6-4  | CAGCAGGAATGTACGAACACATAGTGACACGGTGC GGAGCGT       |
| 6-5  | TAAATCTAAGTAAATGCGATGGGCACAACCCCTCCACAATGAA       |
| 6-6  | TGCCACTCATTTTTTTTTTTTTTATTGCACTTTTTTTTTTTTTTTT    |
| 7-1  | CACATGGGTCTTTTTTTTTTTTTTCCCTCCGATAGTTTTTTTTTTTTTT |
| 7-2  | TCAGACGGGAGGAGTCGTGCGGTTTCGCATTCAGAGGTAAGTA       |
| 7-3  | GAAGTGCACCTGATGAATAGACAAACTGTTTAGGCTAGGATAT       |

7-4 CGTGTCACTACAACCTTTGCTTATAGGTCCCTGGGCCGCCCTCCT  
7-5 GGGTTGTGCCACGCTCCGCACGATACTTATTCTAGAAGCTAGC  
7-6 AAAGTGCAATTTTCATTGTGGAATCCGGTTTCCATTTGTTCTA  
8-1 CTATCGGAGGTACTTACCTCGAGAAAGGGCGATTCCGATCGC  
8-2 TAATGCGAACATATCCTAGCCACCTTTCAGCATGCAAAGTTC  
8-3 TAAACAGTTTAGGAGGGCCAGAACTCCACCTGCCACGTGA  
8-4 CAGGACCTATGCTAGTTCTAGTAGCTAGTCGTAGAATCTACT  
8-5 AATAAGTATCTAGAACAAATGGTGGCTTGTACCCGGAATGTG  
8-6 GAAACCGGATTTTTTTTTTTTTTCGACCGTGTTTTTTTTTTTTT  
9-1 CGCCCTTTCTTTTTTTTTTTTTTATAGAATTCATTTTTTTTTTT  
9-2 GCTGAAAGGTGCGATCGGAATGACGTAAACGACAAAGTAAGG  
9-3 GTGGAGTTCTGAACTTTGCATAGTGAAATGTTGGAACATTGG  
9-4 CGACTAGCTATCACGTGGCAGGTGCACAGAATGAGCGGAAAT  
9-5 TACAAGCCACAGTAGATTCTATTTGATCATCGATGCCCGCAG  
9-6 ACACGGTCGACACATTCCGGGAACCAAGTCTGTTTAAAGTAC  
10-1 TGAATTCTATCCTTACTTTGTTTCGAAAAGTAATCCCATTGTC  
10-2 CGTTTACGTCCCAATGTTCCACGACTGTGACGACAATTGTGCG  
10-3 ACATTTCACTATTTCCGCTCAGGCTATGGCATGCAACGATAC  
10-4 TTCTGTGCACCTGCGGGCATCCATCCAGTGCCGTATGATACT  
10-5 GATGATCAAAGTACTTTAAACTCATCCCTGTTCAACTCTGCA  
10-6 AGACTTGGTTTTTTTTTTTTTTTGAAGACATCTTTTTTTTTTTT  
11-1 TACTTTCGAATTTTTTTTTTTTT  
11-2 GTCACAGTCGGACAATGGGAT  
11-3 TGCCATAGCCCGACAATTGTC  
11-4 GCACTGGATGGTATCGTTGCA  
11-5 ACAGGGATGAAGTATCATAACG  
11-6 GATGTCTTGCTGCAGAGTTGA

Motif 4.2 (10H×11T)

| Name | Sequence                                   |
|------|--------------------------------------------|
| 1-1  | TTCAGCCTTCTTTTTTTTTTT                      |
| 1-2  | AAACACGGCAAAGGTCGAAG                       |
| 1-3  | CCATGTACCAACCTGACAAG                       |
| 1-4  | GTCTCCTGGCCCAGACGAAT                       |
| 1-5  | CATTTGGTCTCCGGATAAGG                       |
| 1-6  | ACGAACTTCGGGATTGACTA                       |
| 2-1  | GAAGGCTGAACTTCGACCTTCTTGTTTCAGCACGGGACAGG  |
| 2-2  | TGCCGTGTTTCTTGTCAGGTTTCAGACGACGGTCCAAAGCA  |
| 2-3  | TGGTACATGGATTTCGTCTGGTGGCCTTCTGTCCGAGATCA  |
| 2-4  | GCCAGGAGACCCTTATCCGGGCAACCCGATGCGGGCGGAA   |
| 2-5  | AGACCAAATGTAGTCAATCCCAATCGGCCCTCGGAACGAC   |
| 2-6  | CGAAGTTCGTTTTTTTTTTTTGCGTCGTCTTTTTTTTTTTTT |
| 3-1  | GCTGAACAAGTTTTTTTTTTTGCTTAAGACATTTTTTTTTTT |
| 3-2  | CGTCGTCTGACCTGTCCCGTCGCCACTTGTCTTCTAACGA   |
| 3-3  | CAGAAGGCCATGCTTTGGACTGGTTAATGGATCATACGTC   |
| 3-4  | ATCGGGTTGCTGATCTCGGAGGTACCGACCCAGCGAGCA    |
| 3-5  | GGGCCGATTGTTCCGCCCGCTCAACAGGCCGTAAACGCAA   |
| 3-6  | AAGACGACGCGTCGTTCCGACATGTACTCCAATCATCCGC   |
| 4-1  | TGTCTTAAGCTCGTTAGAAATATGAGAGAGTATCCTTATG   |
| 4-2  | ACAAGTGGCGGACGTATGATAGCATCTGAGGACGCCACCA   |
| 4-3  | CCATTAACCATGCTCGCTGGGAGTCCCTCGAACAAAGAGA   |
| 4-4  | GTGCGGTACCTTGCGTTTACGTGCGGTGATGCAGGACACA   |
| 4-5  | GGCCTGTTGAGCGGATGATTACATGCACTCTCGGTCATGT   |
| 4-6  | GGAGTACATGTTTTTTTTTTTTCCCAACCGCTTTTTTTTTTT |
| 5-1  | CTCTCTCATATTTTTTTTTTTCTCTAGGCGTTTTTTTTTTTT |
| 5-2  | CTCAGATGCTCATAAGGATAGGTCCGTGTAAAGCATGAAG   |
| 5-3  | CGAGGGACTCTGGTGGCGTCGTTCTCCAGTCTGGCACACA   |
| 5-4  | ATCACCGCACTCTCTTTGTTCTCGACCGGCTTCTTTGTA    |
| 5-5  | GAGTGCATGTTGTGTCTCTGCTCTTGTCTCCTTGGGACGT   |
| 5-6  | GCGGTTGGGAACATGACCGAGAAGATTCGGGTCCCTGTAT   |
| 6-1  | CGCCTAGAGACTTCATGCTTTAGGAGCGTTTCTAAAGGAG   |
| 6-2  | TACACGGACCTGTGTGCCAGCAGTAATACGTTATGGCGGT   |
| 6-3  | ACTGGAGAACTACAAAGAAATCTAAGGCAGTTACAGTGCA   |
| 6-4  | GCCGGTGCAGACGTCCCAAGAGGGAAAAGGCAAACCACCT   |
| 6-5  | GACGACAAGAATACAGGGACCCCTCAACCCCTCACAAGTGT  |
| 6-6  | CCGAATCTTCTTTTTTTTTTTGCTTTATCTTTTTTTTTTTTT |
| 7-1  | AACGCTCCTATTTTTTTTTTTCCCTAATCTCTTTTTTTTTTT |
| 7-2  | CGTATTACTGCTCCTTTAGACCTCCCTTTAATGTGGATTT   |
| 7-3  | CTGCCTTAGAACCGCCATAAAGCTTATTCCTTGCGAAGGC   |

7-4 GCCTTTCCCTTGCACTGTAAGACCCACTTCGCCAAAAGTAG  
7-5 AGGGTTGAGGAGGGTGGTTTTAAATACAGATCTCAGACTGG  
7-6 AAGATAAAGCACACTTGTGAACTCCGATCTTCTTGAAGGG  
8-1 GAGAATTAGGAAATCCACATCTAGTGCTAAGTTAAACAGT  
8-2 TAAAGGGAGGGCCTTCGCAACGGCCATCCCGGAGGTCCAC  
8-3 GGAATAAGCTCTACTTTGGCTACCGCAATCTCATGAGCCG  
8-4 GAAGTGGGTCCCAGTCTGAGCTGTGAACATATAGTCCTCG  
8-5 ATCTGTATTTCCCTTCAAGAGGAAGGTTTGTTCGCTCCTA  
8-6 AGATCGGAGTTTTTTTTTTTTTCGGGCTGAATTTTTTTTTTTT  
9-1 TTAGCACTAGTTTTTTTTTTTTGCGTTCGTTTTTTTTTTTT  
9-2 GGGATGGCCGACTGTTTAACCAGGGCAGTTAGAAGCCAGC  
9-3 GATTGCGGTAGTGGACCTCCTCTAGGGCGTTTAACAAGCG  
9-4 ATGTTACAGCGGCTCATGACTGTGACCACTGGACAGTAT  
9-5 CAAACCTTCCCAGGACTATTAAGGAGTGCAGGCTGCCTT  
9-6 ATTCAGCCCCTAGGAGCGAACCTTGGATCCCACACCAAAT  
10-1 ACAACGACGCGCTGGCTTCTTTGTGAGCGATGCAGCGATC  
10-2 AACTGCCCTGCGCTTGTTAATCGCAATTGGCAGTCCCATA  
10-3 ACGCCCTAGAATACTGTCCAATGGGATGAAGCGTCCCATT  
10-4 GTGGTCACAGAAGGCAGCCTGCCTACTCGCACGACAAAAGT  
10-5 GCACTCCTTAATTTGGTGTGCATCGTCTGCAGACGAAGCG  
10-6 GGATCCAAGGTTTTTTTTTTTTTTCGCTCACTTTTTTTTTTTT  
11-1 TCGCTCACAATTTTTTTTTTTT  
11-2 CCAATTGCGAGATCGCTGCA  
11-3 TTCATCCCATTATGGGACTG  
11-4 GCGAGTAGGCAATGGGACGC  
11-5 GCAGACGATGACTTTGTTCGT  
11-6 AGTGAGCGAACGCTTCGTCT

Motif 4.3 (10H×11T)

| Name | Sequence                                             |
|------|------------------------------------------------------|
| 1-1  | CGGACTGTGCTTTTTTTTTTTTTTTT                           |
| 1-2  | CGGCTAACCATCTCCTCTCGAGGG                             |
| 1-3  | GTGAGTCAAGCCCTTTAATGAGCG                             |
| 1-4  | TTTACGGACCTGGGCCAGGCGTCT                             |
| 1-5  | CCTCTGCCACTGTGATCCGAGCAA                             |
| 1-6  | GTCCCAGCATCCGCGCGTCACTGC                             |
| 2-1  | AAGCACAGTCCGCCCTCGAGAGGACACTTTAAGATGCGTTTAGGGCAT     |
| 2-2  | GATGGTTAGCCGCGCTCATTAAAGCCACCATGGGAATTAGTAAACCCA     |
| 2-3  | GGCTTGACTCACAGACGCTGGCCCAGAACCCTCGCGGATGATCTCTTT     |
| 2-4  | CAGGTCCGTAAATTGCTCGGATCAGGTGCAGGACCATGTACAGGCAGC     |
| 2-5  | CAGTGGCAGAGGGCAGTGACGCGCCATGGATTGTCAGTGCATCAACCG     |
| 2-6  | GGATGCTGGGACTTTTTTTTTTTTTTGTGTCCCTCTTTGTTTTTTTTTTTT  |
| 3-1  | CATCTTAAAGTGTTTTTTTTTTTTTATGTCGGGCGGCTTTTTTTTTTTTTT  |
| 3-2  | TTCCCATGGTGGATGCCCTAAACGGAGGTCTATATGCTCTTCCCTGGG     |
| 3-3  | CGCGAGGTTCTGTGGGTTTACTAATGGGCCGGATAACTACGCCCAAGG     |
| 3-4  | TGGTCCTGCACCAAAGAGATCATCGTTGCTAGAGTGTAAAGCAAAGAC     |
| 3-5  | TGACAATCCATGGCTGCCTGTACATGCCCAAGAGCTTGGAGCGAACGT     |
| 3-6  | CAAAGAGGACACCGGTTGATGCACGAACACTTCGCAAGGTGAGAAAGA     |
| 4-1  | GCCGCCCGACATCCCAGGGAAGAGCCTGTATTTACGGTACCCTCGTAT     |
| 4-2  | CATATAGACCTCCCTTGGGCGTAGTCGCGAGGGTCAAAGGCCGCATTG     |
| 4-3  | TTATCCGGCCCAAGTCTTTGCTTAAACATGCGGACAATCTTCCCTGAGC    |
| 4-4  | CACTCTAGCAACACGTTTCGCTCCATAAAATTGCCCTGGCGCTTAAAGCA   |
| 4-5  | AGCTCTTGGGCATCTTTCTCACCTCATCGTGAATACGGGTGGCGAAC      |
| 4-6  | TGCGAAGTGTTCTTTTTTTTTTTTTTTCAGGTAGTGGATTTTTTTTTTTTTT |
| 5-1  | CGTAAATACAGGTTTTTTTTTTTTTACAACGGGCACTTTTTTTTTTTTTT   |
| 5-2  | TGACCCTCGCGAATACGAGGGTACGGACCTCGCTGCGAGAAGAAACCG     |
| 5-3  | TTGTCCGCATGTCAATGCGGCCCTTCGATGCAGTCTGACTGGCGATGCC    |
| 5-4  | CAGGGCAATTTAGCTCAGGGAAGAATGGTCGTAAGCAGCAGGCCAGTG     |
| 5-5  | TATTACACGATGTGCTTTAAGCGCTATACTTCATTAGATGGAAAGAGC     |
| 5-6  | TCCACTACCTGAGTTCGCCACCCGCTTTATAGCTAGTTCATAGTCTC      |
| 6-1  | AGTGCCCGTTGTCGGTTTTCTTCTCGGGACTCTCGAAGCGACAAGCGTC    |
| 6-2  | GCAGCGAGGTCCCGCATCGCCAGTGTTAACCGCTTCGTCTAAGATCAA     |
| 6-3  | ACGACTGCATCGCACTGGCCTGCTAGTCGGGTGCTGAAGCTGCACGA      |
| 6-4  | GCTTACGACCATGCTCTTTCCATCTTGGCCCATACTTAACTGAATCC      |
| 6-5  | TAATGAAGTATAGAGACTATGGAAGGCGTGTATTGCTTGATGATCG       |
| 6-6  | CTAGCTATAAAGTTTTTTTTTTTTTATCTTGAGTGTGTTTTTTTTTTTTT   |
| 7-1  | TTTCGAGAGTCCCTTTTTTTTTTTTTTAGAGTCGGGCAGTTTTTTTTTTTTT |
| 7-2  | GAAGCGGTTAACGACGCTTGTCGCACTTGTTCATTGATTGCGGCTTACA    |
| 7-3  | AGCAACCCGACTTTGATCTTAGACCTTAGTTCCAAGTTTGACAATTTA     |

7-4 AGTATGGGCCAATCGTGCAGCTTCAAACGTCTTCACGTTCGACAACCT  
7-5 AATAAACACGCCGGATTCAGGTAAACGTATGTAGCATACTTACTAAC  
7-6 CACACTCAAGATCGATCATCAAGCTCGACTTACGTGAGCTGGGAGTGA  
8-1 CTGCCCGACTCTTGTAAGCCGCAATGCGCTCACGATAGGGCGTGGAGT  
8-2 TCAATGACAAGTTAAATTGTCAAAGACGGATTACTGAGCAGACTCCCA  
8-3 CTTGGAACTAAGAGGTTGTGCGAACTGGTAGTCTCTGTGATTTAGCCCT  
8-4 GTGAAGACGTTTGTAGTAAGTATCGACTAGGGAAAGTGGGACATAGA  
8-5 GCTACATACGTTTCACTCCAGCTGACGTTAGGTGCGCCTCTTTCGCA  
8-6 CACGTAAGTCGATTTTTTTTTTTTTTACTCGAGTAGGTTTTTTTTTTTTT  
9-1 ATCGTGAGCGCATTTTTTTTTTTTTTCTGAATCCGGGCTTTTTTTTTTTTT  
9-2 CAGTAATCCGCTCACTCCACGCCCTTTAAACACCAGGATTATACAACT  
9-3 CAGAGACTACCATGGGAGTCTGCTTTATCATCAGTCCGCGGCCATCAG  
9-4 TTTCCCTAGTCGAGGGCTAAATCAATGTGGTAAAGGAAACTGCTCTTA  
9-5 GCACCTAACGTCTCTATGTCCCACCTGCGTTCAGCATGAGTGGCATCC  
9-6 ACCTACTCGAGTTGCGAAAGAGGCTCCGCTTGGTCCCGCACGAGTTGG  
10-1 GCCCGGATTCAGAGTTTGTATAATGCAGTCGGTCCCTTCGTTTGATTAC  
10-2 CCTGGTGTTTAACTGATGGCCGCGAAATTAGCCGTGCGGGCTCATCTA  
10-3 GACTGATGATAATAAGAGCAGTTTACTCTTCAGTTCGGGCGGGAGAAA  
10-4 CCTTTACCACATGGATGCCACTCACAACATCCTTTAAATGATCGGAGT  
10-5 TGCTGAACGCAGCCAACCTCGTGCGAACAGTTGAACACAGATAGGAAGC  
10-6 GGACCAAGCGGATTTTTTTTTTTTTTGGACCAGGCAATTTTTTTTTTTTT  
11-1 AGGACCGACTGCTTTTTTTTTTTTT  
11-2 CACGGCTAATTTGTAATCAAACGA  
11-3 GAACTGAAGAGTTAGATGAGCCCG  
11-4 TAAAGGATGTTGTTTCTCCCGCCC  
11-5 TGTTCAACTGTTACTCCGATCATT  
11-6 TTGCCTGGTCCAGCTTCCTATCTG

Motif 4.4 (10H×11T)

| Name | Sequence                                         |
|------|--------------------------------------------------|
| 1-1  | CAACCTCTGCGTTTTTTTTTTTT                          |
| 1-2  | TTAACGGACGTAGGTACCTCCG                           |
| 1-3  | CGTAGGCACTGTTCGACCTAGT                           |
| 1-4  | CAGAACCATCCATCCTCTTGAA                           |
| 1-5  | CATTTTCGTGCACAGAAGGGTCC                          |
| 1-6  | ATTTATAACCGCTAACATCGGCC                          |
| 2-1  | CGCAGAGGTTGCGGAGGTACCTATGCTGAGCTAATCGTATCCAA     |
| 2-2  | ACGTCCGTTAAACTAGCTGCGAATATAGTCAGCCGTGAACAAGC     |
| 2-3  | CAGTGCCTACGTTCAAGAGGATAAAAGGAACACCCCTATTATTGGC   |
| 2-4  | GGATGGTTCTGGGACCCCTTCTGAACGACGGCCCTTGCTGGAGGA    |
| 2-5  | TGCACGAAATGGGCCGATGTTATATTACAGATTGCGGTAGGTTG     |
| 2-6  | GCGGTATAAATTTTTTTTTTTTTTAGTCAGATAGTTTTTTTTTTTTT  |
| 3-1  | TAGCTCAGCATTTTTTTTTTTTTTACACGGACTTTTTTTTTTTTTT   |
| 3-2  | GCTGACTATATTTGGATACGATTTGGATGCTATGAGGGCTACCC     |
| 3-3  | GGTGTTCCTTTGCTTGTTTCACGGTCTATCTTCAAGTCGCCAGGC    |
| 3-4  | GGGCCGTGCTTGCCTAATAATAGCCTGGTCCGCTGACTAAGAGG     |
| 3-5  | AATCTGTAATATCCTCCAGCAAGAGGCTTCCATAGGGCGGACCG     |
| 3-6  | ACTATCTGACTCAACCTACCGCACGCAAGACTTCCGGCCTGCTG     |
| 4-1  | AGTCCGTGTAAGGGTAGCCCTCGCGGCAAAGGTCGTTAATACGA     |
| 4-2  | ATAGCATCCAAGCCTGGCGACTCGAAGATCGCACGTACAACAGG     |
| 4-3  | TGAAGATAGACCCCTTAGTCATCAGTAAGCAAGTGATGTCGCA      |
| 4-4  | GACGGACCAGGCGGTCCGCCCTGGTTGGGTAGCACACTTGTAGA     |
| 4-5  | ATGGAAGCCTCCAGCAGGCCGGACGGCTTACGCCGTGATCTTCC     |
| 4-6  | AAGTCTTGCGTTTTTTTTTTTTTCTATGTGATGATTTTTTTTTTTTT  |
| 5-1  | ACCTTTGCCGCTTTTTTTTTTTTTTACGTGACAGTTTTTTTTTTTTT  |
| 5-2  | TGCGATCTTCGTGCTATTAACGCTTATTACATTTGTTGTAGATT     |
| 5-3  | TTGCTTACTGACCTGTTGTACGTCCCATTCATACGTGGCCGAGT     |
| 5-4  | GCTACCCAACCTGCGACATCACATCGCGATGCAAACATAAGGCC     |
| 5-5  | GCGTAAGCCGTTCTACAAGTGTGCGGATGCTTAAAGACTATCTT     |
| 5-6  | TCATCACATAGGGAAGATCACGATGAGGCTACCGCAAATCTCCA     |
| 6-1  | ACTGTCACGTAAATCTACAACAGACAAAGATCCCTACGAGAAAG     |
| 6-2  | AATGTAATAAGACTCGGCCACGGCTGAAGCCAGTGAGTTGCGC      |
| 6-3  | TATGAATGGGAGGCCCTTATGTTGCAGAGCCAAAGAGGCGGTCTA    |
| 6-4  | TGCATCGCGATAAGATAGTCTTCCCTTCGCAGCAGTAACGATGAT    |
| 6-5  | TAAGCATCGCGTGGAGATTTGCTCGTTATACGGGCCAGTTGGTC     |
| 6-6  | GGTAGCCTCATTTTTTTTTTTTTTATAACCCCTCATTTTTTTTTTTTT |
| 7-1  | GGATCTTTGTCTTTTTTTTTTTTTTCTAGCTAGTGTTTTTTTTTTTTT |
| 7-2  | TGGCTTCAGCCCTTCTCGTAGTAATAACCTACTATCCACCGCT      |
| 7-3  | TTTGGCTCTGCGGCAACTCACCCCTCGAGACGGCGATGGTCATG     |

7-4 TGCTGCGAAGGTAGACCGCCTCTGGACTCACCGAATGCCGACGG  
7-5 CCGTATAACGAATCATCGTTACAACTAACAAGCTGCATGACTT  
7-6 TAGAGGGTTATGACCAACTGGCACAGTCTATAACTGTATATGGC  
8-1 CACTAGCTAGAAGCGGTGGATAGCCACACTTCGGTGGGCAGCTC  
8-2 GTAGGTTATTACATGACCATCGTGAACGTATTGCTACTGCTGTC  
8-3 CCGTCTCGAGGCCGTCCGCATTAATGCCACCCTTGCTACTATAC  
8-4 CGGTGAGTCCAAAGTCATGCAGCGGGCCGATTTACACACTCCGC  
8-5 CTTGTTAGTTTTGCCATATACAGAGGCAACACCATCCGAAACCGC  
8-6 TTATAGACTGTTTTTTTTTTTTTTCAGGCAAGGCGTTTTTTTTTTTT  
9-1 CGAAGTGTGGCTTTTTTTTTTTTTAAAGGTCGTGTTTTTTTTTTTT  
9-2 CAATACGTTTCAGAGCTGCCCCACTGCCAGGTTAATTATAGAGTTC  
9-3 GGGTGGCATTGACAGCAGTAGCGCTTGGCTGATTACTTCCAGA  
9-4 AAATCGGCCCGGTATAGTACAACCGAGAAATCACAGTCTGTAAA  
9-5 TGGTGTGCTGCGGAGTGTGTGCTGCTTTTCGATCTTTAATGTA  
9-6 CGCCTTGCCCTGGCGGTTTTTCGGAAGCTACGCATCAGCCGGCAGA  
10-1 ACACGACCTTTGAACTCTATAATTCCATATCTATGGCCTTTGCG  
10-2 TTAACCTGGCATCTGGAAGTAACTCGTAGTTTGCACCTATCCAT  
10-3 TCAGCCAAGCGTTTACAGACTGTGCTACTCCGCGAATGTACGTG  
10-4 TGATTTCTCGGTACATTAAGAACCTCCTCTCTCCTGCCCTATT  
10-5 TCGAAAGCACGTCTGCCGGGCTAGATCAAATAGATCTGTATGCG  
10-6 GATGCGTAGCTTTTTTTTTTTTTCTTTATGGTTCTTTTTTTTTTTT  
11-1 TAGATATGGAATTTTTTTTTTTT  
11-2 CAAACTACGAGCGCAAAGGCCA  
11-3 GCGGAGTAGCAATGGATAGGTG  
11-4 AGAGAGGAGGTCACGTACATTC  
11-5 CTATTTGATCTAATAGGGCAGG  
11-6 GAACCATAAAGCGCATAACAGAT

Motif 4.5 (10H×11T)

| Name | Sequence                                                |
|------|---------------------------------------------------------|
| 1-1  | TTGCATTGGCTCGTTTTTTTTTTTTTTT                            |
| 1-2  | AATAGGCAATACACCACGCGCTGCTC                              |
| 1-3  | ACACACTAACCCTGACATGGCACCC                               |
| 1-4  | AATCAACATTAGCGACCGTTTCAGTA                              |
| 1-5  | GTTAGCCGCGTTAGGGCCCATCGGG                               |
| 1-6  | GACCCTTTATGGATGTGGAGTCTAAG                              |
| 2-1  | CGAGCCAATGCAAGAGCAGCGGTGGTTGATCGTTAGGTATCGTGAAACTGC     |
| 2-2  | TGTATTGCCTATTGGGTGCCATGTCAGACGAAGATCGATATGGTTTACAGCT    |
| 2-3  | GTGGTTAGTGTGTTACTGAAACGGTCTCACGTTGAGGAGCTAATAATTCGTA    |
| 2-4  | GCTAATGTTGATTCCCGATGGGCCCTGGTCCCAGGAAATGATCTGTATAAAC    |
| 2-5  | AACGGCGGCTAACCTTAGACTCCACAAGATTGTCTAAGGGCGGTTCGTACCCCT  |
| 2-6  | TCCATAAAGGGTCTTTTTTTTTTTTTTTCGTTACTGCCAGCTTTTTTTTTTTTTT |
| 3-1  | ACCTAACGATCAATTTTTTTTTTTTTTGCTATTTGACTCGTTTTTTTTTTTTTTT |
| 3-2  | ATCGATCTTCGTCGCAGTTTCACGATCAAGTCAGCCGGTTTCGGCCAAGGCA    |
| 3-3  | CTCCTCAACGTGAAGCTGTAAACCATGCTCCAAGGCGCCTCTTCGAAAGAAG    |
| 3-4  | ATTTCCCTGGGACCTACGAATTATTAGACCATCAGGTACCTGACTCGCGACTG   |
| 3-5  | CCTTAGACAATCTGTTTATAACAGATCAATTTGAGACGGACTCGCGTACAACA   |
| 3-6  | GCTGGCAGTAACGAGGGTACGACCCGAGGCTGGAATCGAACACATATAATAC    |
| 4-1  | CGAGTCAAATAGCTGCCTTGGCCGAATTTGCGAGTCTGAGGATGGTCTTGAC    |
| 4-2  | ACCGGCTGACTTGCTTCTTTTGAAGAGACCCTAGCTACACGATGCAAATAGA    |
| 4-3  | GGCGCCTTGGAGCCAGTCGCGAGTCAAGAACACACGGGTCCTAGATGGATAG    |
| 4-4  | GGTACCTGATGGTTGTTGTACGCGAGCGCCCTTAGTTGCATGGACGCTCCTT    |
| 4-5  | TCCGTCTCAAATTTGTATTATATGTGTAGTCACCGCTCCTGCGAAATAGGATC   |
| 4-6  | TCGATTCCAGCCTTTTTTTTTTTTTTAAAGTTGAGTGGCTTTTTTTTTTTTTT   |
| 5-1  | TCAGACTCGCAAATTTTTTTTTTTTTTATGGAGGCTTCATTTTTTTTTTTTTT   |
| 5-2  | TGTAGCTAGGGTCGTCAAGACCATCCTGCTAATCGAGGCTATACCCCTTCCC    |
| 5-3  | ACCCGTGTGTTCTTCTATTTGCATCGAGACATACTCACACATGTCCAAGACT    |
| 5-4  | GCAACTAAGGGCGCTATCCATCTAGGGCGATTCTGCCACGCCTGTGTTGGAA    |
| 5-5  | AGGAGCGGTGACTAAGGAGCGTCCATAGGCAGAGGGACCCTAACAAGGAGTA    |
| 5-6  | GCCACTCAACTTTGATCCTATTTTCGCCCTTAGGGCCGTCAGTTCTTTCAAG    |
| 6-1  | TGAAGCCTCCATAGGGAAAGGGTATAACCAGGGCCAGGTGTCGATGCATGAGA   |
| 6-2  | GCCTCGATTAGCAAGTCTTGGACATGTCTATTTGATGATAGAGACGCGGTAGA   |
| 6-3  | TGTGAGTATGTCTTTCCAACACAGGCTATTGCAGTAGACCAGAGCTATCCCT    |
| 6-4  | GTGGCAGAATCGCTACTCCTTGTAGCCTGCTACCAATCATACCCCTGTATAG    |
| 6-5  | GGTCCCTCTGCCTCTTGAAGAAACTTTAGATCACCCCTCCGTTTGCATAAGG    |
| 6-6  | GACGGCCCTAAGGTTTTTTTTTTTTTATTACAACCCTTCTTTTTTTTTTTTTT   |
| 7-1  | CACCTGGCCCTGGTTTTTTTTTTTTTCAAGAGCTCCTGCTTTTTTTTTTTTTT   |
| 7-2  | CTACTACAATAGATCTCATGCATCGAATTACCCCTCAACGTAGTGGTAGGCTT   |
| 7-3  | GTCTACTGCAATATCTACGCGCTCTGGGTCCTAAGGCGGGAAGTAGATTAA     |

7-4 GATTGGTAGCAGGAGGGATAGCTCTGCATAGCGTACGCCGGGCGCCAGACC  
7-5 GAGGGTGATCTAACTATAACAGGGTATTTCTGCTAGGACGTCGAGCATGGGAT  
7-6 GAAGGGTTGTAATCCTTATGCAAACGCCGCTGCCTGGCAGATCAATCGGACC  
8-1 GCAGGAGCTCTTGAAGCCTACCACTAGACACTAACGTATTTTCAGAGTTACGA  
8-2 CGTTGAGGGTAATTTAATCTACTTCCCTTCTACGGGTGTTCAACGGATTGCT  
8-3 CGCCTTAGGACCCGGTCTGGCGCCCGTAGTCCGACCGACTGCTAAGTGATTG  
8-4 GCGGTACGCTATGATCCCATGCTCGACATCAGTGCTAAATGAAAGCCCTCTG  
8-5 CGTCCTAGCAGAAGGTCCGATTGATCTAGCCGTCCAATGGTCCCATAGACCG  
8-6 TGCCAGGCAGCGGTTTTTTTTTTTTTAAAGACGGCTCGGTTTTTTTTTTTTT  
9-1 ATACGTTAGTGTCTTTTTTTTTTTTTTGTGTGAGAAAAGATTTTTTTTTTTTTT  
9-2 ACACCCGTAGAAGTCGTAACCTCTGAACAAGTCTGTTTCGACCGCTTGTCACG  
9-3 GTCGGTCGGACTAAGCAATCCGTTGAAACGATTGCCACCTCACTCGGCGCGA  
9-4 TTTAGCACTGATGCAATCACTTAGCACGTCAGGCCCTTCAAACCTTGCGTGGC  
9-5 CATTGGACGGCTACAGAGGGCTTTCAGCATTTAGTGGGAATGCTCGTCGGTG  
9-6 CCGAGCCGTCTTTCGGTCTATGGGACCACTGATTGGGTCTACACGTGGAAGT  
10-1 TCTTTCTCACAACCGTGACAAGCGGTATGGGATCGTGATCTCTTCGTCATTT  
10-2 CGAAACAGACTTGTGCGCCGAGTGAATATGGTCATACGCTCGAATAGATTC  
10-3 GGTGGCAATCGTTGCCACGCAAGGTTTCGTAAACTTGTTAGTAATCCGAGCCT  
10-4 TGAAGGCCTGACGCACCGACGAGCATCACCTACCCTCTACACCATGGGATA  
10-5 TCCCCTAAATGCACTTCCACGTGTAGATAAAATTTGGGCCATAGATTCGAGTC  
10-6 GACCCAATCAGTGTTTTTTTTTTTTTTCCAAATGTGAGGCTTTTTTTTTTTTTT  
11-1 ATCACGATCCCATTTTTTTTTTTTTTT  
11-2 CGTATGACCATATAAATGACGAAGAG  
11-3 TAACAAGTTTACGGAATCTATTCGAG  
11-4 AGAGGGTAGGGTGAGGCTCGGATTAC  
11-5 GGCCCAATTTATCTATCCCATGGTGT  
11-6 GCCTCACATTTGGGACTCGAATCTAT

Motif 4.6 (10H×11T)

| Name | Sequence                               |
|------|----------------------------------------|
| 1-1  | GAGCCCAAATTTTTTTTTT                    |
| 1-2  | CCCGTTAGCGCGAAGCGC                     |
| 1-3  | TCCCATTTCGGAATCATCG                    |
| 1-4  | CCTATCGCAACCAGTGTA                     |
| 1-5  | CTTTACCTTTGTTTAGTG                     |
| 1-6  | GGCACCTAGGTTGTATCG                     |
| 2-1  | TTTGGGCTCGCGCTTCGCTGAGCTAGGCGCCATTT    |
| 2-2  | GCTAACGGGCGATGATTTCGAATTGTCGGGTAGAAGC  |
| 2-3  | CGAATGGGATACACTGGTTTAACTGCCGTCGTCTTT   |
| 2-4  | TGCGATAGGCACTAAACAAATTTGGCGTTAAGCGTT   |
| 2-5  | AAGGTAAAGCGATACAACAACCAACATGAATCTTA    |
| 2-6  | CTAGGTGCCCTTTTTTTTTTGCTCTCTCCTTTTTTTTT |
| 3-1  | CTAGCTCAGTTTTTTTTTTTATCAGCGCTTTTTTTTTT |
| 3-2  | CGACAATTCAAATGGCGCGAAGATGTGTGAAATGTA   |
| 3-3  | GGCAGTTAAGCTTCTACCTATCGAGTCTCATGTTCAT  |
| 3-4  | CGCCAAATTAAGACGACATACGTAACCCAGAGGAG    |
| 3-5  | TGTTTTGGTTAACGCTTAAGATAACCACCAGTGTCGCG |
| 3-6  | GGAGAGAGCTAAGATTCATTGTTGCAATCGCGCCCT   |
| 4-1  | GCGCTGATATACATTTTCAGGCGATCTTCGCTTGACC  |
| 4-2  | CACATCTTCATGACATGACTAGTTGAGGTATTAGGA   |
| 4-3  | GACTCGATACTCCTCTGGCCTGCCACCTCTGAGTGG   |
| 4-4  | GTTACGTATGCGGACACTTGAGGTACCTTACTCTGG   |
| 4-5  | GGTGGTATCAGGGCGCGACGAGCGATGCTACCGAGA   |
| 4-6  | TTGCAACAATTTTTTTTTTCAAGTTGTTTTTTTTTTTT |
| 5-1  | AAGATCGCCTTTTTTTTTTCCAGTACGATTTTTTTTTT |
| 5-2  | CTCAACTAGGGTCAAGCGTGCCGCGTTATCGTGTGA   |
| 5-3  | GGTGGCAGGTCCTAATACCTGCTTGACACGCCGTAG   |
| 5-4  | GGTACCTCACCCTCAGAAATACACTTCTGCGCGA     |
| 5-5  | CATCGCTCGCCAGAGTAACACCCTAATCTGACTCGT   |
| 5-6  | AACAACCTGTCTCGGTAGACGATTGCAGGCGCTACA   |
| 6-1  | TCGTACTGGTCACACGATTGCGGCCGAACGTCGAAC   |
| 6-2  | AACGCGGCACTACGGCGTATATATGCCGTCTAGGGC   |
| 6-3  | GTCAAGCAGTCGCGCAGGGCTCCGCGTGCTAGCGAG   |
| 6-4  | AAGTGTATTACGAGTCAGTCAGTGGAAAGTGAGGCTG  |
| 6-5  | ATTAGGGTGTGTAGCGCCGTAAGTCTCGACTTTGGC   |
| 6-6  | TGCAATCGTTTTTTTTTTTGGCTTCAGATTTTTTTTTT |
| 7-1  | TCGGCCGCATTTTTTTTTTCTCCTAGTCTTTTTTTTTT |
| 7-2  | GGCATATATGTTTCGACGTAGCCGTTACTCAGTCAGT  |
| 7-3  | ACGCGGAGCGCCCTAGACCCTCGACCAGGCTAATGG   |

7-4 TTCCACTGACTCGCTAGCACTTTGCCAGTTTAACTA  
7-5 GAGACTTACCAGCCTCACTCTTAGAGTATTCCTCC  
7-6 TCTGAACGCGCCAAAGTCGACTTAATGCCCATAGCA  
8-1 GACTAGGAGACTGACTGATATTGCGAGGCTATACCA  
8-2 GTAACGGCTCCATTAGCCGCTACAATTCTTGCTGTG  
8-3 TGGTCGAGGTAGTTAAACGGTTAGACGTGTCTCGGA  
8-4 TGGCAAAGTGGAGGGAATCTACTGAAACTTTGCCCT  
8-5 ACTCTAAGATGCTATGGGCCTCAGCCAGCCACAG  
8-6 CATTAAGTCTTTTTTTTTTATGCAGGGATTTTTTTTTT  
9-1 CTCGCAATATTTTTTTTTTACGTAAGTTTTTTTTTT  
9-2 AATTGTAGCTGGTATAGCGTATTCGTTGGAGTGATA  
9-3 CGTCTAACCCACAGCAAGGCTCTAGTCACGCCTCAG  
9-4 TTTTCAGTAGTCCGAGACACTGCCTGGGCGTCCCGTT  
9-5 GGCTGGAGGAGGGCAAAGTTAGGGCCCTCATGGTTA  
9-6 TCCCTGCATCTGTGGCTGAACGTTTATTTATGCGTA  
10-1 ACTTACGTGTATCACTCCCAATTCCTTATTTCTCCTCC  
10-2 AACGAATACCTGAGGCGTTTGAATAATAAGGAGCGG  
10-3 GACTAGAGCAACGGGACGGAGCGACACCGACGCCGC  
10-4 CCCAGGCAGTAACCATGATAGCCCACCACACCTGAA  
10-5 GGGCCCTAATACGCATAATAATGGACACGTTTCGGA  
10-6 ATGAACGTTTTTTTTTTTTTCAACTACATTTTTTTTTT  
11-1 AAGGAATTGTTTTTTTTT  
11-2 ATTATTCAAGGAGGAAAT  
11-3 GTGTCGCTCCCGCTCCTT  
11-4 GGTGGGCTAGCGGCGTCG  
11-5 TGTCCATTATTCAGGTGT  
11-6 TGTAGTTGATCCGAAACG

Motif 5.1 (10H×11T)

| Name | Sequence                                         |
|------|--------------------------------------------------|
| 1-1  | GCCAATCACAGTTTTTTTTTTTTTTTTTTTTTTTTTTTTTTGCTCAAC |
| 1-2  | AGAATTGTCGGTTTTTTTTTTTTTTTTTTTTTTTTTTCAAGAGTTCG  |
| 1-3  | TTCCGCTCTTATTTTTTTTTTTTTTTTTTTTTTTTTTTGACGACCGTC |
| 1-4  | GCGAGCACCTTTTTTTTTTTTTTTTTTTTTTTTTTTGCTGAAGAAA   |
| 1-5  | TCTTTATACGTTTTTTTTTTTTTTTTTTTTTTTTTTAAAGTACAT    |
| 1-6  | GATCCTGTGGGTTTTTTTTTTT                           |
| 2-1  | AGAATGGAAGACGTTGAGGCAATTTTTTTTTTTTTTTTTTTTTT     |
| 2-2  | GACAATATTCATCGAACTCTTGCTGTGATTGGTAAAGTCGTA       |
| 2-3  | CCGTAGGCACCAGACGGTCGTCCCGACAATTCGGGTGCGACC       |
| 2-4  | AGAGACGTGCTCTTCTTCAGCTAAGAGCGGATTGTGGAGCT        |
| 2-5  | GACTTGGATTTAATGTACTTTAAAGGTGCTCGCGTGACGTGA       |
| 2-6  | CTAGCAGGGATCCACAGGATCACGTATAAAGGTGTCTGGCA        |
| 3-1  | GACGCTCAGTTACGACTTTATCTTCCATTCTGAACTACCGAC       |
| 3-2  | ATGGACCAACGGTCGCACCGTGAATATTGTCTCTTCCGAAAG       |
| 3-3  | AGTGAGGGTGAGCTCCACAAGGTGCCTACGGTTCATATGCTTA      |
| 3-4  | CCGCTGCCTATCACGTCACGAGCACGTCTCTTCCCTTGTGTA       |
| 3-5  | AAGGTGAAAGTGCCAGACACAAATCCAAGTCGTAGATGGTAC       |
| 3-6  | TTTTTTTTTTTTTTTTTTTTTTTTATCCCTGCTAGGACCTGAGTCA   |
| 4-1  | GCCAAAGAGCAGTCGGTAGTCTTTTTTTTTTTTTTTTTTTTTT      |
| 4-2  | CAGATGCTGGTCTTTCGGAAGAAGTGGTCCATATGCAAATAG       |
| 4-3  | CTGTTGTAAATTAAGCATAGAAGTTGGTCCATATGCAAATAG       |
| 4-4  | GTTAGAGTATGTCAACAAGGGACACCCCTCACTTTGTGTAGCA      |
| 4-5  | TAGGGTCGATCGTACCATCTACTAGGCAGCGGGTCATGCCTG       |
| 4-6  | AGACGCAATTATGACTCAGGTCCCTTTCACCTTGAACAGCGTC      |
| 5-1  | CGGTGTTTTCACGAACGACCTTGCTCTTTGGCACACCTAAAGT      |
| 5-2  | GGGAAATTCCTATTTGCATAACCAGCATCTGTAATCGTATGC       |
| 5-3  | TATAATGAAATGCTACACAAATTTACAACAGCTCCGGCATAA       |
| 5-4  | CGAAACAAATCAGGCATGACCATACTCTAACTCGTTGGCAAT       |
| 5-5  | GCGGAGCCTGGACGCTGTTTCGATCGACCCCTACGCTGATAATA     |
| 5-6  | TTTTTTTTTTTTTTTTTTTTTTAATTGCGTCTCTCTGCTATAA      |
| 6-1  | AAGGTAGCTGCACTTTAGGTGTTTTTTTTTTTTTTTTTTTTTT      |
| 6-2  | GCACAAGGATCGCATAACGATTATGAAACACCGCGCCTTATGA      |
| 6-3  | ACAGAAGGTCCCTTATGCCGGAGGGAATTTCCCTATTCTCGAG      |
| 6-4  | CCCTTTAATGAATTGCCAACGATTTCAATTATATAACCTGTAG      |
| 6-5  | CATAGTAGGTATATTATCAGCGATTTGTTTCGTGGATCGTTG       |
| 6-6  | CTTCTTTAGCTTATAGCAGAGCAGGCTCCGCTGAACACGTA        |
| 7-1  | TGCAGTCGAGTCATAAGGCGGCAGCTACCTTTAAGGAACCGA       |
| 7-2  | CAGGCACTGCCTCGAGAATAGATCCTTGTGCGATTTCGTCATA      |
| 7-3  | TTGTGACCATCTACAGGGTAGGACCTTCTGTACACACGGCGC       |

7-4 CGTTGTGAAACAACGATCCATCATTAAAGGGCCAAGTTTATG  
7-5 ACGGGATACCTACGTGTTTCATACCTACTATGTTTACCATGCC  
7-6 TTTTTTTTTTTTTTTTTTTTTTTGCTAAAGGAAGCACGGCCAAGA  
8-1 TTTGAATGTTATCGGTTCCCTTATTTTTTTTTTTTTTTTTTTT  
8-2 AATTAGCGCGGTATGACGAATCCTCGACTGCAAACGTCCCTT  
8-3 TAACCGCTGTAGCGCCGTGTGTGCAGTGCCTGAAGGTCGTTT  
8-4 AAGCTGATCTCCATAAACTTGGATGGTCACAACCTTCCACTCG  
8-5 GAGCAACGATCGGCATGGTAAATTTACAACGCCACTCGCAC  
8-6 TACTTACTAGTTCTTGGCCGTGGGTATCCCGTAAGAGTCGTG  
9-1 AAGTGGTTTTGAAAGGACGTTTAAACATTCAAACATGCCTGAAG  
9-2 GTAGGTATGTAAACGACCTTCCGCGCTAATTATATTGTATTG  
9-3 TCAACAATTCAGAGTGGAAGTACAGCGGTTAGAGATTGTAAT  
9-4 CCATGTAGACGTGCGAGTGGGAGATCAGCTTGCATTTTCACG  
9-5 AACTTCGTTTTACGACTCTTGATCGTTGCTCCCTTTGGTCCCT  
9-6 TTTTTTTTTTTTTTTTTTTTTTACTAGTAAGTAAGTGCAACAAG  
10-1 CAGAAATCCGCCTTCAGGCATGTTTTTTTTTTTTTTTTTTTTT  
10-2 GCTCATCTTGTCAATACAATATCAAACCACTTCGGTACTCAT  
10-3 ATTCACTAGTTATTACAATCTCACATACCTACGCGTCCACTC  
10-4 CCGAATCGGCGCGTGAAATCGCGAATTGTTGAGGGCTCTGAG  
10-5 AGTCCAGAACCAGGACCAAAGGGTCTACATGGTAGAAAACCGC  
10-6 TTTCTGGAACCTCTTGTGCACTAAACGAAGTTGAGCTGCGCA  
11-1 TTTTTTTTTTTTTATGAGTACCGGCGGATTTCTGTTTTTTTTTTT  
11-2 TTTTTTTTTTTTTGAGTGGACGCACAAGATGAGCTTTTTTTTTTT  
11-3 TTTTTTTTTTTTTCTCAGAGCCCAACTAGTGAATTTTTTTTTTTT  
11-4 TTTTTTTTTTTTTGCGGTTTCTACGCCGATTCGGTTTTTTTTTTT  
11-5 TTTTTTTTTTTTTTGCGCAGCTCGGTTCTGGACTTTTTTTTTTTT  
11-6 TTTTTTTTTTTAGTTCCAGAAA

Motif 5.2 (10H×11T)

| Name | Sequence                                      |
|------|-----------------------------------------------|
| 1-1  | GAAGAAGCAGATTTTTTTTTTTTTTTTTTTTTTTTGTCAACTCTT |
| 1-2  | TTTTTTTTTTTGACACAAAGCGTGGCAGTATATTTTTTTTTTTT  |
| 1-3  | ACTGCCCGCCTTTTTTTTTTTTTTTTTTTTTTTAATGACGCTC   |
| 1-4  | TTTTTTTTTTTCAATTGTAAAGATCGGCCCTCTTTTTTTTTTTT  |
| 1-5  | CCACTGCAAGCTTTTTTTTTTTTTTTTTTTTTTTTCGATFGT    |
| 1-6  | GCTTGCTATGATTTTTTTTTTTT                       |
| 2-1  | GTACCAGGTAACAAGAGTTGACTTTTTTTTTTTTTTTTTTTTTT  |
| 2-2  | TCTGCTTCTTACATGTCCGATCACTCATAATCGCTTTGTGTC    |
| 2-3  | AAGAGTGGCACTGAGCGTCATTTATACTGCCAACGCCCTTGC    |
| 2-4  | AGGCGGGCAGCGGGCTTCGAGAGACAGTTTCCTTTACAATTG    |
| 2-5  | CGTTGTGGCCGACAATCGAAAGAGGGCCGATGTCAAGCATT     |
| 2-6  | GCTTGCACTGACTTATATATACCAGAACGGATCATAGCAAGC    |
| 3-1  | CCAAGGCGCCTCGGACATGTTTACCTGGTACCTGTCGTTTAC    |
| 3-2  | ATTATGAGTGAACGTGCTCTATGCGTCGCGCAGCAAGGGCGT    |
| 3-3  | GCCGGCACTATCGAAGCCCGGTGCCACTCTTCCAGAAATGTGG   |
| 3-4  | GAAACTGTCTCACACGTTTAGTGGATACTATTAATGCTTGAC    |
| 3-5  | GTAAAGGCAAAATATATAAGTGGCCGACAACGGCAATCACCTT   |
| 3-6  | TCCGTTCTGGTTACCACACCCATTTTTTTTTTTTTTTTTTTTTT  |
| 4-1  | CGTGCGAGGATGTAAACGACAGTTTTTTTTTTTTTTTTTTTTT   |
| 4-2  | GGCGCCTTGGCGAAAGGACCGGTGCATGTATATAGAGCACGT    |
| 4-3  | TATTTCAAACCTCCACATTCTGGTGCAGCGACGCGCACCGGTAG  |
| 4-4  | TAGTGCCGGCGAAACTATAGTTGTCAGGGAGACTAAACGTGT    |
| 4-5  | AGGTATGTTCAAAGGTGATTGCAATAGTATCCGAGTCATGTT    |
| 4-6  | TTGCCTTTACGGTAACCGTCGCTTTCCACTATGGGTGTGGTA    |
| 5-1  | AGCTGTTGTGGGTCCCTTTCGATCCTCGCACGCTGCATTTAAAG  |
| 5-2  | ATACATGCACCGCTGCCTCGCGTACGTCAATTTCTACCGGTGC   |
| 5-3  | GGGCTTCGCCCTATAGTTTCAGTTTGAAAATACATCAGAGTGG   |
| 5-4  | CTCCCTGACAAGTTGGCACCTACGGCGTTATAACATGACTC     |
| 5-5  | TCCAGATCGGGACGGTTACCTGAACATACTGCTTAGCCCTC     |
| 5-6  | TAGTGGAAAGCTCAGTGCCTTTTTTTTTTTTTTTTTTTTTTTT   |
| 6-1  | ACGAACAAGGACTTTAATGCAGTTTTTTTTTTTTTTTTTTTTTT  |
| 6-2  | CACAACAGCTATATGGTCCCATATCGCCAGACGCGAGGCAGC    |
| 6-3  | CGGTAACCTAACCCTCTGATGAAATGACGTAAAGTTATGCT     |
| 6-4  | GGCGAAGCCCGGAACTAGACAAAATATAGTCAGGGTGCCAAC    |
| 6-5  | GCCGTACACACGAGGGCTAAGCATAACCCGTCTTAAACGCT     |
| 6-6  | CCGATCTGGATCGTTGACTTCGCCATAAGAGGAGCGCACTGA    |
| 7-1  | CACACGGTTTGGGACCATATTCCTTGTTCGTGCAGAGGAATA    |
| 7-2  | TCTGGCGATATCGTTTGGAGTGGTCTCCTCCATAGCATAAATT   |
| 7-3  | AGAACAACACTCTAGTTCCTTAAAGTTACCGAGGCTATAAG     |

7-4 GACTATATTTGGAAACTACAGACGTGTTGGGCAGCGTTAAGG  
7-5 GTAGAATACTAAGTCAACGAGTGTGTACGGCGAAAGACAAGG  
7-6 CTCTTATGGCGGTAGTATTCCCTTTTTTTTTTTTTTTTTTTTT  
8-1 TTTATGTCAGATATTCCTCTGCTTTTTTTTTTTTTTTTTTTTT  
8-2 AAACCGTGTGCCATATATATTCAGGGCTTGACCACTCAAACG  
8-3 CTGGGTGCCTGCTTATAGACCTATGGAGGAGATATGACCAAC  
8-4 GTGTTGTTCTTGTTCCCGAGCATCTGTTCCGTCTGTAGTTTC  
8-5 TCTTTTCGTGAGCCTTGTCTTTTCGCCAACACGGAACACCCTT  
8-6 AGTATTCTACGGCACGGGCGGTTTGATATTAGGAATACTAC  
9-1 CTTGCAGCTAATATATATGGTCTGACATAAAGTCAGTCGATC  
9-2 TCAAGCCCTGACGTTTAACTGCATTACATAAAGTTGGTCATA  
9-3 GTAAGATCTACTCGGGAACACAGGCACCCAGCTGCTGGTGCG  
9-4 CGGAACAGATGAGGTTAACACAGCCTTATTTCAAGGGTGTTTC  
9-5 AGAGAGACTACGCCCGTGCCCTCACGAAAAGAGTGTCCGAGAG  
9-6 TAATATCAAACGATTTTCACCTATTTTTTTTTTTTTTTTTTTTT  
10-1 GGGTATATAACGATCGACTGACTTTTTTTTTTTTTTTTTTTTT  
10-2 TAGCTGCAAGAGAGTGTCCAATCTCCTCGCAGCAGTTAAACG  
10-3 GATTTGTGCTCCGCACCAGCAGTTTATGTAATCCGACTTACG  
10-4 TAGATCTTACTGCAGCGGAAACACAACGTACTGTGTTAACCT  
10-5 AATACGGGCAACTCTCGGACACGAAATAAGGCCCATAGGTCT  
10-6 TAGTCTCTCTGGTAGTATTCATCTCTTTCAATAGGTGAAATC  
11-1 GTTATATAACCTTTTTTTTTTTTTTTTTTTTTTTGGACTCT  
11-2 TTTTTTTTTTTCGTAAGTCGGTGCAGGAGATTTTTTTTTTTTT  
11-3 GAGACAAAATCTTTTTTTTTTTTTTTTTTTTTTTCCGCTGCA  
11-4 TTTTTTTTTTTAGACCTATGGGTACGTTGTGTTTTTTTTTTTT  
11-5 TTGCCCGTATTTTTTTTTTTTTTTTTTTTTTTTGAATACTACC  
11-6 TTGAAAGAGATTTTTTTTTTTTT

Motif 5.3 (10H×11T)

| Name | Sequence                                          |
|------|---------------------------------------------------|
| 1-1  | TGCAGTTTTTTTTTTTTTTTTTTTTTTTTTTTTTTCCTCCTATGCCAAT |
| 1-2  | TAGGCATTTTTTTTTTTTTTTTTTTTTTTTTTCTACTGGAACAACCA   |
| 1-3  | CTATTGTTTTTTTTTTTTTTTTTTTTTTTTTAAATCCGGAGTGCAGC   |
| 1-4  | CACTTATTTTTTTTTTTTTTTTTTTTTTTTTTGTGAATCGGCGCTTA   |
| 1-5  | CCTAGGTTTTTTTTTTTTTTTTTTTTTTTTTTTCAAGGGCGCGGA     |
| 1-6  | AACATTGGAGGTTTTTTTTTTTT                           |
| 2-1  | AGCCTGGCATAGGAGGATTTTTTTTTTTTTTTTTTTTTTTGTAAAG    |
| 2-2  | CATGAGTGTTCAGTAGACTGCAATTGAAGAGTTTGTACACCT        |
| 2-3  | CAGATACTCCGGATTTGCTATGGTGGCTACCAGATCCTT           |
| 2-4  | CTCAGACGCCGATTCACCAATAGGCTGTGCACGCTGGCGTCA        |
| 2-5  | TCATACCGCCCTTGAAATAAGTGAAGAGATCAATAATATGA         |
| 2-6  | TTCCGGTCCCAATGTTCCTAGGTCCGGTGC GGCCGATGAGG        |
| 3-1  | CGGTGGACAAACTCTTCAGGCTCTTACGTTGAGAGCGAGTTA        |
| 3-2  | CAGCCATCTGGTAGCCCTCATGAGGTGCCGTACGGCGCAGAT        |
| 3-3  | AAACGACCAGCGTGCATATCTGAAGGATGGAAAAGCAAACCGG       |
| 3-4  | TAAGGATTATTGATCTTCTGAGTGACGCGAGTAACCCGGAGA        |
| 3-5  | CCCTGCTCGGCCGCACGTATGATCATATGTACCCTCTAAACG        |
| 3-6  | TTTTTTTTTTTTTTTTTACC GAACCTCAATCCGGA ACTTTTTT     |
| 4-1  | ACTAATTCGCTCTCAACTTTTTTTTTTTTTTTTTTTTTTAAGG       |
| 4-2  | TCCCGAGCGCCGTACGGCCACCGTAACGCAACGACGGTCTTC        |
| 4-3  | TTACGTTTTGCTTTCCATGGCTGATCTAGTAGTACGTACCTC        |
| 4-4  | CACTCTCGGGTTACTCGTCGTTTTCCGGTGCCGGGCTCGAAAAG      |
| 4-5  | CGAAGTTAGAGGGTACATCCTTATCTCGGCATAAAAGAAATTA       |
| 4-6  | CGCCAGAAGTTCCGGATGCAGGGCGTTAAGCATGACGGGTG         |
| 5-1  | CATTACCCGTCGTTGCATTAGTCCTTATAAATGCTGGTAGAA        |
| 5-2  | GGGATAACGTACTACTTCGGGAGAAGACCTTCAGTGACTGCC        |
| 5-3  | TTACACGAGCCCGGCACGTGAAGAGGTGCCCTAGCTCGCGGC        |
| 5-4  | AAGGCGTCTTTATGCCAGAGTGCTTTCGCGGCTGGACATCCT        |
| 5-5  | TGAAATGTCATGCTTAACTTCGTAATTACCTCCGAGCAGAAG        |
| 5-6  | TTTTTTTTTTTTTTTTTCTGGCGCACCCCTTACTGCAATGTTTT      |
| 6-1  | CAGTGAACCAGCATTTATTTTTTTTTTTTTTTTTTTTTTCCACA      |
| 6-2  | CGCTCTGTCACTGAAGGGTAATGTTCTGCCGCTTAAGCTAT         |
| 6-3  | TGGTCACGAGCTAGGGCTATCCCGCAATGTCACCCAGGACT         |
| 6-4  | ATGTGTTGTCCAGCCGCTGTAAGCCGCTCTCTCCGGAAAAGA        |
| 6-5  | TGTAACTGCTCGGAGGTCGCCCTTAGGATGCACCTTATCCCTT       |
| 6-6  | CGCCACCATTGCAGTAAATTTCACTTCAGGTAAACACAAAAGA       |
| 7-1  | AGGGCGTTAAGGCGGCTCACTGTGTGGGCATTGCAATTCATC        |
| 7-2  | AACGGTTGGGTGACATAGAGCGATAGCCTAGACATGCTACGG        |
| 7-3  | TTGAACCCGGAGAGAGTGACCAAGTCCCTATGACCTCTCACT        |

7-4 CATGACATAAGGTGCAACACATTCTTTTCGCAATCCGTTGAGA  
7-5 TATACGGTGTTTACCTGTTACAAAGGGCCGACTCGGTACGAG  
7-6 TTTTTTTTTTTTTTTTTTGTGGCGTCTTTCATTCACGCCTTTTT  
8-1 AGATACAATTGCAATGCTTTTTTTTTTTTTTTTTTTTAGCA  
8-2 GCGCACAGCATGTCTAGCGCCCTGATGCTCAAACGATGCTAC  
8-3 TAGCTCAGAGGTCATAGACCGTTCCGTCGTGCGGCCCGGGAG  
8-4 TAAAGTAACGGATTGCGGTTCAAAGTGCCTCCGTCCGCTTG  
8-5 GTCGCTTACCGAGTCGGGTCATGTCTCCTGTACAATAGAGGC  
8-6 GAGCCTAGGCGTGAATGCGTATACTCGGAATAGGCCACAAGT  
9-1 TCACAGATCGTTTTGAGGTATCTTGCTAAAAGAGAGCGTTACTG  
9-2 GTTATCGGGCCGCACGGTGCCTGCTAGCTACAGGCAAGCGGTA  
9-3 GTCGCGGGACGGAGCGGAGCTACTCCCTTTACCTGGGTTCCA  
9-4 ATCCCTTATTGTACAGACTTTACAAGCATGCTGCCCTGGCCA  
9-5 TCCCTCTGGCCTATTCAGCGACGCTCGCAGCTCAAGAATGG  
9-6 TTTTTTTTTTTTTTTTTTAGGCTCACTTGCTAGCTGACATTTTT  
10-1 ACCGTGAACGCTCTCTTTTTTTTTTTTTTTTTTTTTTTGTAAT  
10-2 GTGAAAGCTTGCCGTACTGTGACAGTCAACCGCGCTCCTAC  
10-3 ACCAGGACCCAGGTAAAGATAACTACCTGGGCGCGCTGGTAT  
10-4 ACAATGCAGGGCAGCATCGCGACTGGAAGCTCATGGGTTCAA  
10-5 TGTACTTCTTGAGCTGCAGGGATTGGCCTTAAAAGGCCTTGCT  
10-6 GGGTAGATGTCAGCTAGGAGGGACCATGGGCCCTTGATTTCC  
11-1 TTTTTTAGCGCGGTTGCACGGTATTACTTTTTTTTTTTTTTTT  
11-2 TTTTTTAGCGCGCCCATTTACGTAGGTTTTTTTTTTTTTTTTT  
11-3 TTTTTTCCCATGAGCTCCTGGTATACCTTTTTTTTTTTTTTTTT  
11-4 TTTTTTGGCCTTTAAGCATTGTTTGAATTTTTTTTTTTTTTTTT  
11-5 TTTTTTTCAAGGGCCAGTACAAGCAATTTTTTTTTTTTTTTTT  
11-6 TTTTTTTTTTCTACCCGAAA

Motif 6.0 (10H×11T)

| Name | Sequence                                      |
|------|-----------------------------------------------|
| 1-1  | AGTTGTGTGTCTGCACTAATA                         |
| 1-2  | CTATAGGTAACGAGACCGGAA                         |
| 1-3  | AGGCAGTCCGTAACGCCTACC                         |
| 1-4  | CACTGAAGGGTTTGCGTTCGT                         |
| 1-5  | TGCATCTCTCCGTGTCGTATA                         |
| 1-6  | TACGTATAGGCTTTTTTTTTTT                        |
| 2-1  | TTTTTTTTTTTCAAGCACACGTGACACACAACTTTTTTTTTTTT  |
| 2-2  | GTTACCTATAGTATTAGTGCAGCAGTGAATAAGAAATATCCT    |
| 2-3  | GCCTCACATTCCGGCCCGAGCCACGGACTGCCTTTCCGGTCTC   |
| 2-4  | ACCCTTCAGTGGGTAGGCGTTCAATAAGCATTGAAGGGCCC     |
| 2-5  | TCACTTTAGAACAGCCCATTCCGGAGAGATGCAACGAACGCAA   |
| 2-6  | GCCTATACGTATATACGACACGCCTGATTAGTCCGATATTTA    |
| 3-1  | AGTAGGATAGCGTCAAAGACGTATTCACTGCACGTGTGCTTG    |
| 3-2  | AATGTGAGGCAGGATATTTCTACTTTCAGCCTCGCACTTTGT    |
| 3-3  | CACGAAGGGCAACCTCGATAAATGCTTATTGGGCTCGGGCCG    |
| 3-4  | TCTAAAGTGAGGGCCCTTCAACAGAGTCTCGAAAGCAACCT     |
| 3-5  | CGACTTGCGTAGTTCCGTTATCTAATCAGGCGAATGGGCTGT    |
| 3-6  | TTTTTTTTTTTTAAATATCGAAAGGCTCCCTCTTTTTTTTTTT   |
| 4-1  | TTTTTTTTTTTTCGCTCCCTACTGCTATCCTACTTTTTTTTTTTT |
| 4-2  | AGGCTGAAAGTCGTCTTTGACTAGATAGAGGTAGAGCATGGA    |
| 4-3  | TGGCGTATATCTACTTTGCGATGCCCTTCGTGACAAAAGTGCG   |
| 4-4  | CCGAGACTCTGTTATCGAGGTTACCCGCCGTTTCCCTCATAAC   |
| 4-5  | GTCCTAGAGAGCATATTGAAAGTACGCAAGTCGAGGTTGCTTT   |
| 4-6  | GAGGGAGCCTTATAACGGAAGTCAAGTTCATCGGATTCA       |
| 5-1  | TCTGGACGGGCTTTACTTAGACCTCTATCTAAGTAGGGAGCG    |
| 5-2  | ATATACGCCATCCATGCTCTATCGGATATCGAATCTTTAAGC    |
| 5-3  | CGACTCGAGGGCAGTTAGTGTACGGCGGGTATCGCAAAGTAG    |
| 5-4  | TCTCTAGGACGTATGAGGAAAATATTCGAACTTGCTCTTGGT    |
| 5-5  | CAAGGACTGCTGGAGGAACTAAACTTTCTCACTTCAATATGC    |
| 5-6  | TTTTTTTTTTTTGAATCCGATGAATGGGCAGCATTTTTTTTTTT  |
| 6-1  | TTTTTTTTTTTTGTCTTATTTAGGCCCGTCCAGATTTTTTTTTTT |
| 6-2  | TCGATATCCGATCTAAGTAAACCAGGTATGTGCATAGAACAT    |
| 6-3  | CGTAATGTTTAAAGGCGGTCGGCCCTCGAGTCGGCTTAAAGAT   |
| 6-4  | AGTTCGAATATACACTAACTGTTGCTTTACAGGCTCATCATC    |
| 6-5  | GGTGTGCAATGGAACCTGCCAGCAGTCCCTTGACCAAGAGCA    |
| 6-6  | TGCTGCCCATTTAGTTCCCTCCTCGTGGGAGACCCGGAGTGAA   |
| 7-1  | CGCCTATAACATGCGATCGTTACATACCTGGCTAAATAAGAC    |
| 7-2  | AAACATTACGATGTTCTATGCAGCGCAGGCTTTGGCACTAGT    |
| 7-3  | TTAACCACATTCGCGCTGGGCTGTAAAGCAACCGACCGCCTT    |

7-4 ATTGCACACCGATGATGAGCCTCGTTGGTGAGTAGCCCTGGT  
7-5 TATGGTCTGACGTTTAGATGGTCTCCCACGAGGGCAGGTTC  
7-6 TTTTTTTTTTTTCACTCCGGGTGGGTCCAAGCTTTTTTTTTT  
8-1 TTTTTTTTTTTTCAATTATTTGTGTTATAGGCGTTTTTTTTT  
8-2 AAGCCTGCGCTAACGATCGCAACTGCTCCGAAGCTATAAGG  
8-3 CCCGCTAGATCGTCTCACGAATGTGGTTAAACTAGTGCCA  
8-4 CTCACCAACGAGCCCAGCGCGTGAATCCGGCCAGAACTGTCT  
8-5 TGGTGCTGCAGTGAATCTGACGTCAGACCATAACCAGGGCTA  
8-6 GCTTGGACCCACCATCTAAACCAACTCAGCGTGTTCGGAAGA  
9-1 GATTGCTATCGATTTAGGTCGTCGGAGCAGTCAAATAATTGA  
9-2 CTAGTGCGGGCCTTATAGCCTTCTATAGTAGAGGATCCTAG  
9-3 GTAAGATGAGAGATGCGTACGGCCGGATTACGTCGAGACGAT  
9-4 TGCAGCACCAAGACAGTTCTGCCCATACACCTGGTCGAAGCG  
9-5 AGGAGGCATTACCCACCACAACGCTGAGTTGGTCAGATTCAC  
9-6 TTTTTTTTTTTTCTCCGAACAACGACGATAATTTTTTTTTTT  
10-1 TTTTTTTTTTTTAAATGCATGTCCGATAGCAATCTTTTTTTTTT  
10-2 CTA CTACTATAGAACGACCTAAATTC CCGGTTTGCCCTCTACAAG  
10-3 GACGCTGGGATTAATCTACCCTCTCATCTTACCTAGGATCCT  
10-4 AGGTGTATGGGCGTACGCATCGAGTGCAAGCCTTG GACCGGA  
10-5 CTGGCGCCTAAGGGCCTAGTCTAATGCCTCCTCGCTTCGACC  
10-6 ATTATCGTCGTTTGTGGTGGGTGCTGCTAACCTAGTATCCAT  
11-1 CAAACCGGGAGACATGCATTA  
11-2 TCCCAGCGTCCTTGTAGAGGG  
11-3 GCTTGCACTCGGGTAGATTAA  
11-4 TAGGCGCCAGTCCGGTCCAAG  
11-5 GTTAGCAGCAGACTAGGCCCT  
11-6 TTTTTTTTTTTTATGGATACTAG

Motif 6.1 (10H×11T)

| Name | Sequence                                     |
|------|----------------------------------------------|
| 1-1  | GTACCTACTTAAAGCGGTACC                        |
| 1-2  | AGCATTGGCAGGAGGCGGTGC                        |
| 1-3  | CTTGGAAGCCGTAGCCACGCC                        |
| 1-4  | AGTTAGTGCGCAGAATGGTCC                        |
| 1-5  | GTTCCCTTCCAGGGACGATTTA                       |
| 1-6  | TCACACCCACTTTTTTTTTTTT                       |
| 2-1  | TTTTTTTTTTTTCTAAAGCTAGTTAAGTAGGTACTTTTTTTTTT |
| 2-2  | CCTGCCAATGCTGGTACCGCTCCGATGGGCCCTAAAGTATCC   |
| 2-3  | TGGCAAAGATAGATTCAAACGACGGCTTCCAAGGCACCGCCT   |
| 2-4  | TGCGCACTAACTGGCGTGGCTGGATATTTGCGCAAAGTGTTT   |
| 2-5  | AAACATTGCCGCGCTGTATTTCTTGGAAAGGAACGGACCATTC  |
| 2-6  | AAGTGGGTGTGATAAATCGTCAAAGCGTGTTCGATGTCATCCC  |
| 3-1  | AGGGCATATCGGAGGTCCCTTGGGCCCATCGGCTAGCTTTAG   |
| 3-2  | TATCTTTGCCAGGATACTTTAATAACCGTCTTAGCAGATAGC   |
| 3-3  | GGAACGCCTAAAGTACCATTCCGCAAAATATCCCGTTTGAATC  |
| 3-4  | CGGCAATGTTTTAAACACTTTGGTACACTAATGGGACACAAGC  |
| 3-5  | CCTCCCGCTACCGACAAAAGGTCGACACGCTTTAAAATACAGCG |
| 3-6  | TTTTTTTTTTTTGGGATGACATTTAAGGATTAGATTTTTTTTTT |
| 4-1  | TTTTTTTTTTTTCAACCTGACTCCGATATGCCCTTTTTTTTTTT |
| 4-2  | TAAGACGGTTATAAGGGACCTAACAGTGACGCAAGGTGCCTC   |
| 4-3  | AGACGACATCAAATAAAGAAATTTAGGCGTTCCGCTATCTGC   |
| 4-4  | CCATTAGTGTACGAATGGTACGTGTATTGATCGGGACCAGCG   |
| 4-5  | CGTAGAAACTGAGTATTGGGCGGTAGCGGGAGGGCTTGTGTC   |
| 4-6  | TCTAATCCTTAAACCTTTGTCTTCGATGATATAACTGCGCT    |
| 5-1  | TATAGAAGAAGCCGCAGCAGCGCTCACTGTTAGTCAGGTTG    |
| 5-2  | TGATGTCTGCTGAGGCACCTTAAAGAGGACGAAACTCCAATT   |
| 5-3  | AGGCTAGCCCTCGTGCCCATCGATCAATACACTTTCCTTTATT  |
| 5-4  | CAGTTTCTACGCGCTGGTCCCTTCCGACGTTGTCGCAGACTT   |
| 5-5  | CAACCCGCGTCACACGCATGTTATCATCGAAGGCCCAATACT   |
| 5-6  | TTTTTTTTTTTTAGCGCAGTTAGCGAGCGCCGAGTTTTTTTTT  |
| 6-1  | TTTTTTTTTTTTTAACGGCGTGGCTTCTTCTATATTTTTTTTTT |
| 6-2  | TTTCGTCTCTTTGCTGCTGCGGTCTTTAAATATGTAGGTGGT   |
| 6-3  | AACTAGACGTTGGTAACTGGTGGAGGGCTAGCCTAATTGGAGT  |
| 6-4  | ACAACCTGCGGAAGATGGGCACACCGCTATAAAATCACATACGC |
| 6-5  | ACTCCCTACTGACGTTAGAACTGACGCGGGTTGAAGTCTGCG   |
| 6-6  | CTCGGCGCTCGCACATGCGTGCCGGGTACGCCTAGTTGGGC    |
| 7-1  | TCCACATTAACAGCGGAGATCTATTTAAAGACCACGCCGTTA   |
| 7-2  | AACGTCTAGTTACCACCTACAACCAAATATTCATTAAACTAT   |
| 7-3  | TCAGACCCATAGCCTTTGAACTTTATAGCGGTACCAGTTACC   |

7-4 CAGTAGGGAGTGCGTATGTGAAAAGCAGCACCAAGGCGCGTCG  
7-5 GTTGGGCGACGGACCAACGTAGCGTAGCCCGGGTTCTAACGT  
7-6 TTTTTTTTTTTTGGCCAACTAGTTCTGTGCGACAGTTTTTTTTTT  
8-1 TTTTTTTTTTTTGGCCGATTATGTAAATGTGGATTTTTTTTTTT  
8-2 TGAATATTTGGTGATCTCCGCGTGGTTGCTAGCAGTAAAGAG  
8-3 ATCTTTGCCACCCAAGAGAGGCTATGGGTCTGAATAGTTTAA  
8-4 TTGGTGCTGCTTGTTCAAAGGCGGTGACACGATCGGAGCTGC  
8-5 TGGAATAGCGCGGCCACGCACCGTCGCCAACCGACGCGCC  
8-6 CTGTGCGACAGAATACGTTGGTTTGAGCTTGTTCGCGGCTTAT  
9-1 ATTTGGGCGGAGCGTTTACCGTCTAGCAACCACTAATCCGGGC  
9-2 GTGGCAAAGATCTCTTTACTGAAAGTTAATCACCGTCCGATT  
9-3 CCAATCCTTGACAAACGGGCGTTCGTGTCACCGCCTCTCTTGG  
9-4 GCGCTATTCCAGCAGCTCCGACGGCATGGCTACTCCTCCCAT  
9-5 ATGATACAATTGGCGGACCTGAACAAGCTCAATGCGTGGGCC  
9-6 TTTTTTTTTTTTATAAGCCGCGTTACGCCTCCATTTTTTTTTTT  
10-1 TTTTTTTTTTTTATTTAACCCTGCTCCGCCCAATTTTTTTTTTT  
10-2 GTGATTAACTTTACGGTAAACCCTTCGGCGGCCTACCCGCAT  
10-3 ACACCGACATAGGAGGTCTTCGTCAAGGATTGGAATCGGACG  
10-4 GTAGCCATGCCGCGCCCGTTTATGACATGGAAACATAACCCG  
10-5 CCCGCATGCGCTGTGAGGTGACAATTGTATCATATGGGAGGA  
10-6 TGGAGGCGTAACCAGGTCCGCTCATCCAGTAATAACTTCCCT  
11-1 GCCGCCGAAGGAGGGTTAAAT  
11-2 TATGTCGGTGTATGCGGGTAG  
11-3 TTCCATGTCATGAAGACCTCC  
11-4 GCGCATGCGGGCGGGTTATGT  
11-5 TTACTGGATGATCACCTGACA  
11-6 TTTTTTTTTTTTAGGGAAGTTA

Motif 6.2 (10H×11T)

| Name | Sequence                                       |
|------|------------------------------------------------|
| 1_1  | TTTTTTTTTGGCGCAATCTAGT                         |
| 1_2  | TACGCCCTGGTCACGTA CTG                          |
| 1_3  | ACGGGAACGCCGGTCTATAAA                          |
| 1_4  | GGGCACCCGAGGTAGGTCTCA                          |
| 1_5  | GCCGACACAAGTGCATGGCTG                          |
| 1_6  | TAGACAATGCTGACACGGTCTG                         |
| 2_1  | TTTTTTTTTTTTTTTTTCGCAGCGATTGTTGTCCAACCTGCGCCA  |
| 2_2  | TTCCCGTCGAGTACGTGACCAGGGCGTAACTAGATGATACAC     |
| 2_3  | CAGCTAACTTTGTACGACCCGACTATCACCACGATACCGGCG     |
| 2_4  | TGTCGGCTGAGACCTACCTCGGGTGCCCTTTATAGTGAGGCG     |
| 2_5  | CCCTAAGTAACGTTGGACGAGAAACGTCCGCGTTTGC ACTTG    |
| 2_6  | TTTTTTTTTTTTTTTTTGT CAGCATTGTCTACAGCCATAGTCTGA |
| 3_2  | TTTTTTTTTTTATATCTTGTTACTATTTCTCTAACGTACAAAG    |
| 3_3  | CTTAGGGCGCCTCAATCGTGGTGATAGTCGGGTCGTCTATAG     |
| 3_4  | GAAAGTACTATGCTACATAATGATGTGGAAGACCCAACGTTA     |
| 3_5  | TTTTTTTTTCAGACTAAACGCGGACGTTTCTCGTCCGCTCTAG    |
| 3_6  | TAATTAAGATCTAGTTTAATATTGGCGTCCCTAGCTTTTTTTT    |
| 3_1  | TTAGCTGGTGTATCGGTTGGACAACAATCGCTGCGTTTTTTTT    |
| 4_1  | TTTTTTTTTTTTTTTTTATAATTGACCAGGTAGTGAGCATATAAA  |
| 4_2  | TACTTTCCTATAGACGTTAGAGAAATAGTAACAAGTCGCCTT     |
| 4_3  | AGGTGGGCGTTCTGGTGCCTGGCTCGTTCGTCTGTAGCATAG     |
| 4_4  | TTAATTACTAGAGCGGGTCTTCCACATCATTATGTCGTTTCAT    |
| 4_5  | TATTCGTAAGAATGGCGTTAATACCTAGCTTGCAGCTAGATC     |
| 4_6  | TTTTTTTTTTTTTTTTTGCTAGGGACGCCAATATTAAACGTGCAT  |
| 5_2  | TTTTTTTCCCGTAGACCTGGGAACCTGGTGAGTTACAGAACG     |
| 5_3  | ACGAATAATGAACGACAGACGAACGAGCCAGGCACCTACACG     |
| 5_4  | TGTCGAGATTGACTCTATCCTGGCAGTTATGCGGACATTCTT     |
| 5_5  | TTTTTTTTATGCACGCTGCAAGCTAGGTATTAACGCCGAGCGG    |
| 5_6  | TGGATCTCAGCCTTTACCCGGTGTATTACTTGGCCTTTTTTTTT   |
| 5_1  | CCCACCTAAGGCGAGCTCACTACCTGGTCAATTATTTTTTTTT    |
| 6_1  | TTTTTTTTTTTTTTTTTAATCAATGACACAACCGGTACCTACGGG  |
| 6_2  | CTCGACACGTGTAGTA ACTCACCAGGTTCCAGGTACGGTGT     |
| 6_3  | TGGTTCGCTGGAACGGCCCGTATCTCTAAAGTAGCAGTCAAT     |
| 6_4  | AGATCCACCGCTCGTCCGCATAACTGCCAGGATAGAAGGAGC     |
| 6_5  | TTACAAGCTCCGAGAGAAGCCTGGATGCCGGCGTTAAGGCTG     |
| 6_6  | TTTTTTTTTTTTTTTTTGGCCAAGTAATACACCGGGTAACTGCCA  |
| 7_2  | TTTTTTTTAAATAATCACTCGCAGCAAATGTGGCGAGTTCCAG    |
| 7_3  | CTTGTAAGCTCCTTGCTACTTTAGAGATACGGGCCTGTCCGA     |
| 7_4  | CTGAACAAAGCAGGGCCCTACCTGAGTCGTTTGGTCTCGGAG     |

7\_5 TTTTTTTTTGGCAGTAACGCCGGCATCCAGGCTTCTTCCCTAG  
7\_6 TACCACTGAGACAAAGGACAATGTCTGGCCGGGTGTTTTTTTT  
7\_1 CGAACCAACACCGTGTACCGGTTGTGTCATTGATTTTTTTTT  
8\_1 TTTTTTTTTTTTTTCAAGTTTATACGTCTGACTTAATTATTT  
8\_2 TGTTTCAGTCGGACATCGCCACATTTGCTGCGAGTGCTGTGCT  
8\_3 GGACTGCTGCAAGTGTGGGCTCCCGGATACGCACCCTGCTT  
8\_4 AGTGGTACTAGGGAACCAAACGACTCAGGTAGGGCAGAGTGT  
8\_5 GCTATGGCCCTAGAATACATAGAAGAACACTGGTGTGTCTC  
8\_6 TTTTTTTTTTTTTTTCACCCGGCCAGACATTGTCCTCACTCTG  
9\_2 TTTTTTTACTTTAAGCAGGAACCTTCTATGGGTAACTTGCA  
9\_3 CCATAGCACACTCTGTGCGTATCCGGGAGGCCACTTTCGGG  
9\_4 CTTTGGCCGTAATAGAGCCCTGTAGGTAGCGTTTGTCTAGGG  
9\_5 TTTTTTTCAGAGTGCACCAGTGTCTTCTATGTATCTGTATA  
9\_6 TGATTCGGATGGAATCCGACCAAATATCTGTGCTTTTTTTTT  
9\_1 GCAGTCCAGCACAGTAAGTCAGACGTATAAACTTGTTTTTTTT  
10\_1 TTTTTTTTTTTTTTTTTAAGCGAACCCCTTCGTCATTTAAAGT  
10\_2 GCCAAAGCCCGAAATAACCCATAGAAGGTTCCCTGCCTTGCTC  
10\_3 CAGGTGCGAAGGAGACTCCACCGCTGCAGATTCTATATTACG  
10\_4 GGAATCATATACAGCAAACGCTACCTACAGGGCTCTTTCTTA  
10\_5 TTCAAATTTAGTGCGACTGAACGAGGCTCAGGGCCTTCCATC  
10\_6 TTTTTTTTTTTTTTTAGCGACAGATATTTGGTCGGATAATATT  
11\_3 TGCAGCGGTGGAGTCTCCTTC  
11\_4 ATTTGAATAAGAAATAGAATC  
11\_5 AGCCTCGTTCAGTCGCACTAA  
11\_6 TTTTTTTAATATTAGGCCCTG  
11\_1 AGGGTTCGCTTAAATTTTTTTT  
11\_2 GCACCTGGAGCAAGATGACGA

Motif 6.3 (10H×11T)

| Name | Sequence                                      |
|------|-----------------------------------------------|
| 1_1  | TTTTTTTTTGTGCGACCTATT                         |
| 1_2  | GTTCTAGGACCACGTCGTTGT                         |
| 1_3  | TCTGGACGAGGATTGGGCGTA                         |
| 1_4  | ATGTCATTCCAATTTATGACT                         |
| 1_5  | TCAACCGGGTCACCCACTGCC                         |
| 1_6  | GCTAAACATTTTATGGATCGAG                        |
| 2_1  | TTTTTTTTTTTTTTTTAGGTACGTCCTCCTTACTCCTGCGACA   |
| 2_2  | CGTCCAGAACAACGACGTGGTCC TAGAACAATAGGTTTGGCA   |
| 2_3  | GTCGCAGACGCTTAGGTATAACCC TGGCCACTGAACAATCCT   |
| 2_4  | CCGGTTGAAGTCATAAATTGGAATGACATTACGCCACCTAGC    |
| 2_5  | CCGTCCGAATTTGATGTGATTCCGCTATCGCCCTTGGGTGAC    |
| 2_6  | TTTTTTTTTTTTTTTTTCATAAATGTTTAGCGGCAGTCTGAAGG  |
| 3_2  | TTTTTTTTTTTGTACCATGAGTTTAATATGCTTTAACTAAGCG   |
| 3_3  | TCGGACGGGCTAGGTTTCAGTGGCCAGGGTTATACTGGGTCC    |
| 3_4  | GGCTAGTCACCCACAATGACGGCCCGCTTCTTCATATCAAAT    |
| 3_5  | TTTTTTTTTCCTTCAGAAGGGCGATAGCGGAATCACGGCAAAC   |
| 3_6  | GGATAGCAGGTCTCGTCGGCACGGCCATTCCCTTTTTTTTTT    |
| 3_1  | CTGCGACTGCCAAAGGAGTAAGGAGGACGTACCTATTTTTTTT   |
| 4_1  | TTTTTTTTTTTTTTTTTAAGCTCGTAGACATCCGGTGGGTACAA  |
| 4_2  | GACTAGCCGGACCCATTAAAGCATATTAAACTCATATGATTA    |
| 4_3  | AGGAGAGGTGTACCGCTCGAGGTTCGTCTACCCTATGTGGGT    |
| 4_4  | TGCTATCCGTTTGCCATGAAGAAGCGGGCCGTCATCGGACCT    |
| 4_5  | GTAGATTGCCTAATTT CAGGTGCTTCACTCGTGACCGAGACC   |
| 4_6  | TTTTTTTTTTTTTTTTTAAGGGAATGGGCCGTGCCGAGGAGTAC  |
| 5_2  | TTTTTTTTTTCGGGCGGGCACTTCCCTTAAACTGGACGGTACA   |
| 5_3  | CAATCTACAGGTCCGTAGGGTAGACGAACCTCGAGCTGCGTT    |
| 5_4  | GATCCGATTCCCTACCCGCCACAGCACCAAGAGCAAATTAGG    |
| 5_5  | TTTTTTTTTGTACTCCGTCACGAGTGAAGCACCTGAACGCACT   |
| 5_6  | CATTGTTTGTAGAGATT C GAGCGGGTATGCCTCTGTTTTTTTT |
| 5_1  | CTCTCCTTAATCATCACCGGATGTCTACGAGCTTCTTTTTTTT   |
| 6_1  | TTTTTTTTTTTTTTTTTCCCTGTAACAGGCTGGCAGTACGCCCGA |
| 6_2  | ATCGGATCAACGCAGTCCAGTTTAAGGGAAGTGCCCTCGGGT    |
| 6_3  | TAGACCATGTCAAGGCAGCTAACCAGTTCACGAGTGTAGGGA    |
| 6_4  | AAACAATGAGTGC GTTGTCTCTTGGTGTGTGGCGGGCGGAAT   |
| 6_5  | AGGTACATCCACACTACAGCCACATATTTAGTGTTCTCTAC     |
| 6_6  | TTTTTTTTTTTTTTTTTTCAGAGGCATACCCGCTCGAATGCGTGC |
| 7_2  | TTTTTTTTTGAGGCAAAGCCGTACGAAGGCCGTTCTCCTTGAC   |
| 7_3  | ATGTACCTATTCCGCACTCGTGAAC TGGTTAGCTGATTTGCA   |
| 7_4  | GTCC TGGGCACGGGACCTTGGTGATCACTCAGAATGTGTGGG   |

7\_5 TTTTTTTTCGACGCAACACTAAATATGTGGCTGTAGGAGGGT  
7\_6 TACCAGCACGTATTCTCGACCAAATGTATCGTCCCTTTTTTTT  
7\_1 TGGTCTAACCCGAGTACTGCCAGCCTGTTACAGGGTTTTTTTT  
8\_1 TTTTTTTTTTTTTTTTTTCCACCCTATAACTCCTGCCTTGCCTC  
8\_2 CCCAGGACTGCAAATAGAACGGCCTTCGTACGGCTATGCGTC  
8\_3 GCTTATTAGACTTCTGAGTTACCGGTTGAGAACGCTCCCGTG  
8\_4 TGCTGGTAACCCCTCATTCTGAGTGATCACCAAGGTAACCTC  
8\_5 TTAGACGCCTATCAGTGTGTTCTGCGTCCACTGCGGAATACG  
8\_6 TTTTTTTTTTTTTTTTTTGGGACGATACATTTGGTCGACAAAGCT  
9\_2 TTTTTTTTCCTTGGTCCTCTAAACACGAATCGGTCAGAAGTC  
9\_3 GCGTCTAAGAAGTTAGCGTTCTCAACCGGTAACCTCACGACAT  
9\_4 AGTCAAGGCTTGAGGGCGTCAGTAACAGATACGGTCTGATAG  
9\_5 TTTTTTTTAGCTTTGCGCAGTGGACGCAGAACACAAAGGGAA  
9\_6 CGTATATCATGGTGGTTAACGTACCTTGTTGGCTTTTTTTTTT  
9\_1 AATAAGCGACGCATGGCAGGAGTTATAGGGTGGAGTTTTTTTTT  
10\_1 TTTTTTTTTTTTTTTTTTATAGTGATGGGCTGCCCAACGACCAAGG  
10\_2 CCTTGACTATGTCGTGACCGATTTCGTGTTTAGAGGCATCCAC  
10\_3 TAACGTCGAGTAGTCTCACGAAATAGAAAGATTTACCTCAAG  
10\_4 GATATACGTTCCCTTACCGTATCTGTTACTGACGCGGTATAC  
10\_5 AGCCCTCAGTAGGTAGGATGCACTATTGGTGGTAACCACCAT  
10\_6 TTTTTTTTTTTTTTTTTTAAGCCAACAAGGTACGTTAACCCAGTC  
11\_3 TTTCTATTTTCGTGAGACTACT  
11\_4 TGAGGGCTGTATACCTAAATC  
11\_5 CCAATAGTGCATCCTACCTAC  
11\_6 TTTTTTTTACTGGGTTACCA  
11\_1 CAGCCCATCACTATTTTTTTTT  
11\_2 GACGTTAGTGGATGCGTTGGG

Motif 7.1 (10H×11T)

| Name | Sequence                                       |
|------|------------------------------------------------|
| 1-1  | AGCCCACTCGGGCGGGACGG                           |
| 1-2  | TCAGCGATATTAGGCTGTTAA                          |
| 1-3  | ATCTCGACGATCGCATGCAGC                          |
| 1-4  | CAACGCTCCTAGTCATCTTTC                          |
| 1-5  | GATATAGCACCCGATTACCT                           |
| 2-1  | TTTTTTTTTTTTTTTTTTTTTTTTTACTTTCTCTCGCAACTTAGTA |
| 2-2  | TTTTTTTTTTTTTTTTTTTTTTTTTCCGTCCGCGCCCGAGTGGGCT |
| 2-3  | TTAACAGAAGACAGGTGATAACCCTGGCACACCTCGATTAAC     |
| 2-4  | GAGTTTACCTAATATCGCTGAGCTGCATGCGATCGTCGAGAT     |
| 2-5  | GAAAGATGAAGGCGGGCGAGCCGGCTCACTAACGTCGGTTCG     |
| 2-6  | TTTAGCAGACTAGGAGCGTTGAGGTGAATCGGGTGCTATATC     |
| 3-1  | TTATCACCTGTCTTTAAACTCTACTAAGTTGCGAGGTGCCGA     |
| 3-2  | TAGCAATGGATGACCCGGGATCATTCGGATTAGACAGAAAAGT    |
| 3-3  | GCTCGCCCGCCTTCTGCTAAAGTTAATCGAGGTGTAAATTGT     |
| 3-4  | ACGTGTTTGTACGACCGTTGATGTGTCTGTGAGTTGCCAGGG     |
| 3-5  | TTTTTTTTTTTTTTTTTTTTTTTTTCGAACCGACGTTAGCATAGTC |
| 3-6  | TTTTTTTTTTTTTTTTTTTTTTTTTCATTCCCTGTGGTCTGAGCCG |
| 4-1  | TTTTTTTTTTTTTTTTTTTTTTTTTGCCACCCCTCCCTTCAAGATC |
| 4-2  | TTTTTTTTTTTTTTTTTTTTTTTTTCGGCACGTCTAATCCGAATG  |
| 4-3  | ATCCCGGCCATTGAGGTACCGTCGAAGCAGCGACCCAAGCTT     |
| 4-4  | TCAATCTGTATCCATTGCTAAACAATTTAACTCACAGACACA     |
| 4-5  | TCAACGGCAATGGTCACTACAGTACATGGTTGACAGGTGGT      |
| 4-6  | GGAGCACTCGTACAAACACGTGACTATGGACCACAGGGAATG     |
| 5-1  | CGGTACCTCAATGGAGATTGAGATCTTGAAGGGAGTCTGAAG     |
| 5-2  | CAGGATCCACGGTAAAGCTATTCCCTCTTCGAACAGGTGGGC     |
| 5-3  | TGTAGTGACCATTGGTGCTCCAAGCTTGGGTCGCTAGCTGGT     |
| 5-4  | CGAGTGTTTAAACGAGCCCTAATCTCGAGTATCCCTGCTTCGA    |
| 5-5  | TTTTTTTTTTTTTTTTTTTTTTTTTACCAACCTGTCAACTTTAGCG |
| 5-6  | TTTTTTTTTTTTTTTTTTTTTTTTTCTCTACGGTGGGTACATGTAC |
| 6-1  | TTTTTTTTTTTTTTTTTTTTTTTTTACGGCGAAAGATGCATATACG |
| 6-2  | TTTTTTTTTTTTTTTTTTTTTTTTTCTTCAGATGTTCGAAGAGGGA |
| 6-3  | ATAGCTTGAATAGGGCGTTAATCTGGAAGGGATACCCTGACA     |
| 6-4  | CGTTAAATACCGTGGATCCTGACCAGCTAGGGATACTCGAGA     |
| 6-5  | TTAGGGCAAATTCCTCGAGCAGCCAGAGATCATGTCTCTAGA     |
| 6-6  | TCCAGTTTCGTTAAACACTCGCGCTAAATACCCACCGTAGAG     |
| 7-1  | TTAACGCCCTATTCTTTAACGCGTATATGCATCTTTAATTGT     |
| 7-2  | TGTTACCCGTTATCATCGTATGGTCTACTCGGATTCGCCGT      |
| 7-3  | TGCTCGAGGAATTTAACTGGATGTCAGGGTATCCCAGGTTAA     |
| 7-4  | GCGCTTTCGCTTGTGAATTAGACGAGACATCGAGCTTCCAGA     |

7-5 TTTTTTTTTTTTTTTTTTTTTTTTTTTTTTTTTCTAGAGACATGATAAAGGCAG  
7-6 TTTTTTTTTTTTTTTTTTTTTTTTTTTTTTATACTGCCGGTGAGCTCTGGC  
8-1 TTTTTTTTTTTTTTTTTTTTTTTTTTTTTTACTGCCGGAACGCTGCCCT  
8-2 TTTTTTTTTTTTTTTTTTTTTTTTTTTACAATTAAATCCGAGTAGACC  
8-3 ATACGATCGATTTCTTAGCAGGCCAAAGGAGCGTTGGTCACA  
8-4 GCTATTGGATAACGGGTAACATTAACCTGCTCGATGTCCTCGT  
8-5 CTAATTCGATATACGGGTTGCTGGCATTATACGAACTTGATT  
8-6 TGGGCCACAAAGCGAAAGCGCCTGCCTTCTCACCGGCAGTAT  
9-1 CTGCTAAGAAATCGCAATAGCAGGGCAGCGTTCCGGCTAAAT  
9-2 TGTCGTGTATGGTGCAAAGACACTGAAGCTGGGCCGAGTAA  
9-3 GCAACCCGTATATCGGGCCCATGTGACCAACGCTCTTGGGTT  
9-4 GACAAGGTCTAGCGTTACTTGGTACTGTGTGTACTTTGGC  
9-5 TTTTTTTTTTTTTTTTTTTTTTTTTTAATCAAGTTCGTATAGCTCAG  
9-6 TTTTTTTTTTTTTTTTTTTTTTTTTTCTACGGACGCTCCAATGCCA  
10-1 TTTTTTTTTTTTTTTTTTTTTTTTTTGGGCTACCGAGGGTCTGGGCC  
10-2 TTTTTTTTTTTTTTTTTTTTTTTTTTATTTAGCGGCCAGCTTCAGT  
10-3 GTCTTTGGGTCCGCAGGGCTCGGAACGCTATGCCGCCCTCTA  
10-4 GGTTCATCACCATACACGACAAACCAATACACACACAGTAC  
10-5 CAAGTAATCCGGCGCTCCC GCGCACATGGGCATACGCCTG  
10-6 TATCGCGCGCTAGACCTTGTCTTGAGCTGGAGCGTCCGTAGA  
11-1 GGCCCAGACCCTCGGTAGCCC  
11-2 GAGCCCTGCGGACCATGAACC  
11-3 TAGAGGGCGGCATAGCGTTCC  
11-4 GCGGGAGCGCCGGACGCGATA  
11-5 CAGGCGTATGCCCATGTGCGC

Motif 7.2 (10H×11T)

| Name | Sequence                                     |
|------|----------------------------------------------|
| 1-1  | GTGCAGTAAGTCTGCCGAAGA                        |
| 1-2  | ATATGACTTCGGTCAACAACA                        |
| 1-3  | GGATCTTTGTGGGACAGAAGG                        |
| 1-4  | CCACAGATGCCGGGACCCGAT                        |
| 1-5  | AGAGGAGAGCATGATATGCTC                        |
| 1-6  | TTTTTTTTTTTTTTTTCCTTTCG                      |
| 2-1  | TTTTTTTTTTTTTTTCTTCGGCACCCGCACCACCGTTCCACG   |
| 2-2  | TTTTTTTTTTTTTTTGGGATTCAGACTTACTGCACTGTTGTT   |
| 2-3  | GACCGAAGTCATATCCTTCTGTGCGTTTGGTCGGAATTTGC    |
| 2-4  | GCCAGTAGCAGAAGCCGTTGATCCACAAAGATCCATCGGGT    |
| 2-5  | CCCGGCATCTGTGGGAGCATAACGTCTGTTGAGTTATCTGAG   |
| 2-6  | CTTGCGGCTCTTAGACCCAAGTCATGCTCTCCTCTCGAAAGG   |
| 3-1  | CTTCTGCTACTGGCCGTGAAACTAAACCTCTCGAAACCGTC    |
| 3-2  | TTCACGAGATTGATAGCGTAACGGTGGTGCGGGTGAAATCCC   |
| 3-3  | CTAAGAGCCGCAAGGCAAATTGCCCTCTTACATACGCCAATA   |
| 3-4  | GGCATGCGATTGCGGTAGGGCCGCGACCAAACGCATCAACGG   |
| 3-5  | TTTTTTTTTTTTTTTCTCAGATGACGTCTCATTCATCGCACTG  |
| 3-6  | TTTTTTTTTTTTTTTCTAAGTAACTCAACAGACGTCTTGGGT   |
| 4-1  | TTTTTTTTTTTTTTTGACGGTTAATCTCTCTCGCCACCCTCC   |
| 4-2  | TTTTTTTTTTTTTTTGTACCTATCGAGAGGTTTAGTTTACGCT  |
| 4-3  | ATCAATCTCGTGAATATTGGCGATAATTACTTTAATTGATTT   |
| 4-4  | ATGGAGGGTCTGTCCGGGCTGGTATGTAAGAGGGCGCCCTAC   |
| 4-5  | GCGAATCGCATGCCAGTGCGTCCCTCGCTTCCGGCGCTGTTCG  |
| 4-6  | GAGCAAAGAGCGATGTCCGATATGAATGAGACGTCACCTAGA   |
| 5-1  | GACAGACCCTCCATGGAGGGTATCTTAGGTCATTTATTCCCG   |
| 5-2  | TTTACTTGATCCCATCTAGATGGCGAGAGAGATTATAGGTAC   |
| 5-3  | ATCGCTCTTTGCTCAAATCAATCCGCATTGAACTGAAGCGGA   |
| 5-4  | CTCTGTTTCTATATTAAGCTATTAAAGTAATTATCCAGCCCG   |
| 5-5  | TTTTTTTTTTTTTTTTCGACAGCCATTTATGTACATCAATACGA |
| 5-6  | TTTTTTTTTTTTTTTGGCCGATGCCGGAAGCGAGGAATCGGAC  |
| 6-1  | TTTTTTTTTTTTTTTTCGGGAATCTAGACACGCCCGGAGACTTA |
| 6-2  | TTTTTTTTTTTTTTTGTAGGTCGAAATGACCTAAGATATCTAGA |
| 6-3  | TGGGATCAAGTAAATCCGCTTGAAGTTAATTCGATTGCGTCA   |
| 6-4  | CCGAATCGAACATAGTTAGCTCAGTTCAATGCGGATAGCTTA   |
| 6-5  | ATATAGAAACAGAGTCGTATTCATCATCCTCAGTTCAACTTC   |
| 6-6  | CCCGATTAAGCGTCCGCTATCGATGTACATAAATGATCGGCA   |
| 7-1  | TATGTTTCGATTTCGGTAAGTCTGGCACCTTGTGATGGGCGAGG |
| 7-2  | TCAAGCGAGCTCTTTGCCATGCCGGGCGTGTCTAGCGACCTA   |
| 7-3  | GACGCTTAATCGGGTGACGCAACCTTTGCACTTCGGCTGCGA   |

7-4 ACATCGAGTCGACCGCAATCTATCGAATTAAC TTCAGCTAAC  
7-5 TTTTTTTTTTTTTTTGAAGTTGTTCCCTGCCTGGATTCGGCTG  
7-6 TTTTTTTTTTTTTTTATCAGTAACTGAGGATGATGGATAGCG  
8-1 TTTTTTTTTTTTTTTCCTCGCCCTACTCATATAGTGTGCGG  
8-2 TTTTTTTTTTTTTTGTATCGTCATCACAAAGGTGCCCATGGCA  
8-3 AAGAGCTCGCTTGATCGCAGCATGACACCCTAAGATTCTGGT  
8-4 ACGATATAGACGACGGACGTACGAAGTGCAAAGGTAGATTGC  
8-5 GGTGACTCGATGTCAGCCGATAACACTTCATACACTTCGCA  
8-6 CTATACAGTTTTCGAGGACGGATCCAGGCAGGGAAACTGATA  
9-1 GTCGTCTATATCGTCCGCAAAGAGAACGATTAGCGACGTAAG  
9-2 CATTTGTTTCAGCGGACCGCGCACTATATGAGTAGACGATAC  
9-3 CGCAAACGTATAGACCAGAACGTCTATGTGGCCCTTGGGTC  
9-4 CCGACTCTTACCGCTGAATTTCTTAGGGTGTATTACGTCC  
9-5 TTTTTTTTTTTTTTTGCGAAGGTGGTTTGACGTCCTAAGGAA  
9-6 TTTTTTTTTTTTTTTACTGGTATGTATGAAGTGTACCGTCCT  
10-1 TTTTTTTTTTTTTTCTTACGTCGGCACACTAACATGGCCATA  
10-2 TTTTTTTTTTTTTTTACCACACCGCTAATCGTTCTCCGCGGTC  
10-3 CGCTGAAACAAATGGACCCAATAATAGTTTAGGACTAAATTC  
10-4 TAGGTATAGGATCCAAGGGTGGGCCACATAGACGAATTCAG  
10-5 CCGGTAAGAGTCGGTTCCTTAACTTAATCTATTAGGCCAGAT  
10-6 TTTCTAGCCAAACAGTGCCGCAGACGTCAAACCACTACCAGT  
11-1 ATGTTAGTGTGCCGGTGTGGT  
11-2 GAATCCTATACCTATATGGCC  
11-3 GTCCTAAACTATTAACCCTTG  
11-4 TGTTTGGCTAGAAAGAATTTA  
11-5 CTAATAGATTAAGTGCGGCAC  
11-6 TTTTTTTTTTTTTTTATCTGGC

Motif 8 (10H×11T)

| Name | Sequence                                      |
|------|-----------------------------------------------|
| 1-1  | TTTTTTTTTTTGGACGATGAGCG                       |
| 1-2  | ACTAGGTCTAGCTACCCGGGT                         |
| 1-3  | TTATGGCCGCTCGTGTGCACC                         |
| 1-4  | CGTCTGGGTCCGGTCCGCCTC                         |
| 1-5  | GACACGATCTTAAGCCGAATG                         |
| 1-6  | CGGACGTATGGCCCAACGTTG                         |
| 2-1  | CCACGCCATACCGGCGGATACTAGACCTAGTCGCTCATCGTC    |
| 2-2  | ACGCGACAATCACCCCTATTGGGCGGCCATAAACCCGGGTAGC   |
| 2-3  | TAATAGCGTACGTGGGAAAGAGACCCAGACGGGTGCACACGA    |
| 2-4  | ATTACCGGAACGGAAGATCACAGATCGTGTGCGAGGCGGACCC   |
| 2-5  | CGATGCTACTTGACGACGCATCATACGTCCGCATTCGGCTTA    |
| 2-6  | ATTTACCGGACTTTTTTTTTTTTTTTTTTTTCAACGTTGGGC    |
| 3-1  | GTGTGCGCCATCAGTCGTTCTGTATGGCGTGGTTTTTTTTTTTT  |
| 3-2  | CACAATGAATTAAGACTTGGCGATTGTCGCGTGTATCCGCCG    |
| 3-3  | GCAAAGCACGTCAGTATTGGAGTACGCTATTACCAATAGGGT    |
| 3-4  | AGGGCTTACGTTCTCCAAGGCGTCCGGTAATCTTTCCAC       |
| 3-5  | GCCGCTACCCTCCATAGCGGCAAGTAGCATCGGTGATCTTCC    |
| 3-6  | TTTTTTTTTTTTTACCAGCGAGTGTCCGGTAAATATGCGTCGTC  |
| 4-1  | TTTTTTTTTTTTTAGAACGACTGAAGGTAGCCGATCCCAGTCAC  |
| 4-2  | ATGGGCGACACGCCAAGTCTTCATCGTTGAATGAGGTACATT    |
| 4-3  | AATTCATTGTGTCCAATACTGTAAATGCCCAATCGGCGCTAA    |
| 4-4  | ACGTGCTTTGCGCCTTGGAGATCTCGATTGTTGAGCCGGA      |
| 4-5  | ACGTAAGCCCTGCCGCTATGGCATTCCTCAAGGACAAGGCTATC  |
| 4-6  | AGGGTAGCGGCACTCGCTGGTTTTTTTTTTTTCTATGAACAGA   |
| 5-1  | TTTTTTTTTTTTGTGACTGGGATAACAACAACCGTATACACGTGT |
| 5-2  | CGGCTACCTAATGTACCTCACAGAGGGCTCCCTCAAAGCGC     |
| 5-3  | TTCAACGATGTTAGCGCCGATATCGCGGGCACGCGCCGCGGA    |
| 5-4  | TGGGCATTTATCCGGCTCAAATTCGTCAGTGTTCATTAAGGAC   |
| 5-5  | CGAATCGAGAGATAGCCTTGTGATGTCGCGGGCTTGGGAAT     |
| 5-6  | CCTTGGAATGTCTGTTTCATAGCACGACATAGTTTTTTTTTTTT  |
| 6-1  | CGGGCTCTCCCATAGTGGCCACGGTTGTTGTTTTTTTTTTTTTT  |
| 6-2  | GCTGGCCGCCACAACCACCGGAGCCCTCTGACACGTGTATA     |
| 6-3  | AGCCGATTAAGAATGACGCACTGCCCCGCGATGCGCTTTGAGG   |
| 6-4  | CCTCCACTTTCTACATTGGGTCACTGACGAATCCGCGGCGCG    |
| 6-5  | AGAATAAAGGTTGTGTATGAACGCGACATCAGTCCCTAATGA    |
| 6-6  | AGGTAGGATGATTTTTTTTTTTCTATGTCGTGATTCCCAAGCC   |
| 7-1  | TTGGTGTTCGCCTACATAGAAGGGAGAGCCCGTTTTTTTTTTTT  |
| 7-2  | CTCGGCGATTTCGTGACACTGAGGGCGGCCAGCTGGCCACTAT   |
| 7-3  | ACCTCCCTAAGATGGTTCGCGCTTAATCGGCTCGGTGGTTGT    |

7-4 CAAGACTGACGTATCCCGGAGGAAAAGTGGAGGGTGCGTCATT  
7-5 GATAGCGAGTACCTTCTTTACACCTTTATTTCTACCCAATGTA  
7-6 TTTTTTTTTTTTCCAAGGTTTCATCATCCTACCTTTCATACACA  
8-1 TTTTTTTTTTTTTTCTATGTAGTTTCGACTAGAAACAAGAGCG  
8-2 GCGAACACCAATCAGTGTCACTATCCAGGCGGTATCGATGTA  
8-3 GAATCGCCGAGCGCGAACCATGGTGAACCGCCAAGAAGAAAAC  
8-4 CTTAGGGAGGTCTCCGGGATAAAGGGCCTAAGGAGGGAGGCT  
8-5 CGTCAGTCTTGGTAAAGAAGGAGCATATACGTTGAGGCGGGC  
8-6 TACTCGCTATCTGAACCTTGGTTTTTTTTTTTTTAGCCTCCTGT  
9-1 TTTTTTTTTTTCGCTCTTGTATCTTTCGGTTGGTCCCATGGG  
9-2 CTAGTGCGAATACATCGATAACCGAAAGTAACAAGAAGGTACG  
9-3 CGCCTGGATAGTTTCTTCTTGGAGAAAATTACGAATCTGAAAAG  
9-4 GCGGTTACACCAGCCTCCCTCCTGACAAGACGACACTGAGCGA  
9-5 TTAGGCCCTTGCCCGCCTCAAATCTTTAAGGTGACATAAGAT  
9-6 CGTATATGCTACAGGAGGCTACCCCTCAGTAGTTTTTTTTTTTT  
10-1 CAGCTACATTATCGGTTGCCTAACCGAAGATTTTTTTTTTTTT  
10-2 TCGTACTGAACAAAGAGACTAGTTACTTTTCGCCCATGGGACC  
10-3 GTCACCTGTTACACTCTAGTGTAATTTCTCCGTACCTTCTT  
10-4 TATACTGCGCCCTAAAGCAACCGTCTTGTCACTTTCAGATTC  
10-5 CGCGGTAATTTGCTGTACCGTCTTAAAGATTCGCTCAGTGT  
10-6 AAGTGCACAGATTTTTTTTTTCTACTGAGGGATCTTATGTCA  
11-1 TAATGTAGCTGTTTTTTTTTTT  
11-2 GTTCAGTACGAAGGCAACCGA  
11-3 GAACAGGTGACTAGTCTCTTT  
11-4 GCGCAGTATAACTAGAGTGT  
11-5 AAATTACCGCGGTTGCTTTAG  
11-6 TCTGTGCACTTACGGTACAGC

Motif 9 (10H×11T)

| Name | Sequence                                        |
|------|-------------------------------------------------|
| 1-1  | TAGAGTGTGCACGACAACACG                           |
| 1-2  | CTGGGCTAGTTTAACGCTAGT                           |
| 1-3  | GCGTGTCTGGGCAGTCCACCCA                          |
| 1-4  | ATGTGATCACAACCACGCTAT                           |
| 1-5  | GGAATCATAGTACAAATGCAA                           |
| 1-6  | TTTTTTTTTTTCTGGATATGAC                          |
| 2-1  | TTTTTTTTTTTTCGTGTTGTCGTGAAAAGTTTGTGATGGCTCGTC   |
| 2-2  | GCACACTCTAACTAGCGTTAATGGCTTCTGCACCGATAATCG      |
| 2-3  | ACTAGCCCAGTGGGTGGACTGGTACTTCTTTGTCAGATGTGA      |
| 2-4  | CCCGACACGCATAGCGTGGTTCGCAGAACAGACCAGATTAAG      |
| 2-5  | GTGATCACATTTGCATTTGTAACGCTGTGCCCGTATCACAAAT     |
| 2-6  | CTATGATTCCGTCATATCCAGCGTCTCCGATTTTTTTTTTTTTT    |
| 3-1  | TTTTTTTTTTTATCGAAAAGAAAACAAACTTTTCTTTTTTTTTTTTT |
| 3-2  | TACCTTATTCAAGTTGTCTGAGGCAGAAGCCAGACGAGCCATC     |
| 3-3  | ACCACACCGAGTTTACAGATTAAGAAGTACCGATTATCGGT       |
| 3-4  | TGTTCCACCTAATGGGCCCACCTGTTCTGCGTCACATCTGAC      |
| 3-5  | CGTTCCGGCTCCCTATAGCCAGGGCACAGCGTCTTAATCTGGT     |
| 3-6  | CTGATGAGACACTACAACCACATCGGAGACGATTGTGATACG      |
| 4-1  | TGAATAAGGTATTCTTTTCGATGATGGCGGCGGTTTTTTTTTTTT   |
| 4-2  | CTCGGTGTGGTCTCGACAACCTTAAGGATCTTCGAGCTCCGAG     |
| 4-3  | TAGGTGGAACAAATCTGTAAAGGCCCGAACAACTAAATGGGC      |
| 4-4  | GGAGCCGAACGGTGGGCCCATGAACAGGGCTCAGCGGACACA      |
| 4-5  | TGTCTCATCAGCTGGCTATAGTCGGCTTACTTCTGCAAGGGC      |
| 4-6  | TTTTTTTTTTTTTGTGGTTGTAGAATCATGGTTACACCAATCTG    |
| 5-1  | CCCATTTATTCAAGGTGGACACCCGCCATCCTCGGAGCTC        |
| 5-2  | CACAAGTCCATGGGCCAGCGTGAAGATCCTTAGCCCATTTAG      |
| 5-3  | TTTAGACTGTACACTCAACGGTTGTTCCGGCCGTGTGTCCGCT     |
| 5-4  | GGAGAATTTGGGAGCGGTTAGAGCCCTGTTCCGCCCTTGCAG      |
| 5-5  | TTCCGGCATGTCTGGAGACCTCAAGTAAGCCGACAGATTGGTG     |
| 5-6  | TTTTTTTTTTTTGAAATAGGTGATAACCATGATTTTTTTTTTTTT   |
| 6-1  | TTTTTTTTTTTTTGTCCACCTTGTGATCAGGCCGCTGGACACCG    |
| 6-2  | AATAAATGGGACGCTGGCCCAAGACGTGCGGCACCCTTTAAG      |
| 6-3  | TGGACTTGTGCCGTTGAGTGTATACCTTCAGCTAGACTCCAG      |
| 6-4  | ACAGTCTAAATAACGCGCTCCTTGGCTAGGTGGGCTTAACTA      |
| 6-5  | CAAATTCCTCCGAGGTCTCCGACGTCTAACAGTATTCAGATCC     |
| 6-6  | CATGCCGAATCACCTATTTCTGATTTAGCTTTTTTTTTTTTT      |
| 7-1  | TTTTTTTTTTTTTCATGTACTACGGCCTGATCATTTTTTTTTTTTT  |
| 7-2  | ACTAACGTAGTTTATTCTATCCCGCACGTCTCGGTGTCCAGC      |
| 7-3  | TCACGCATAAAGTCCAAGCCTCTGAAGGTATCTTAAAGGGTG      |

7-4 ATGCTCGTTATATAAAGGACAACCTAGCCAACCTGGAGTCTAG  
7-5 GGGCATTATGATCAGAATTGTCTGTTAGACGTAGTTAAGCCC  
7-6 GGACGTGGGCCTTTAGATCGAGCTAAATCAGGGATCTGAATA  
8-1 ACTACGTTAGTGTAGTACATGAAAGTCCAGGATTTTTTTTTT  
8-2 TTTATGCGTGAGATAGAATAAAGCAGAAGAAGTTCATGGGCG  
8-3 ATAACGAGCATAGGCTTGGACGCACAGCGACAACCGATGCGT  
8-4 TCATAATGCCCTGTCCCTTTATGTTCAAGGGTCCTAACCTCGG  
8-5 GGCCACGTCCACAATTCTGATTATGAAACGGCTTTGCATAG  
8-6 TTTTTTTTTTTTTTCGATCTAAAGATAGGTCTGCCAACTCCCAT  
9-1 CTGAGCGTACACCTCCCAAAGTCTTGGACTTTTCGCCCATGAA  
9-2 GAAGCAGCCGGTTCACGTGGACTTCTTCTGCTACGCATCGGT  
9-3 GTTAACGCGCCGCTGAGCGCATGTCGCTGTGCCCGAGGTTAG  
9-4 CATCGATCTGTAGAGTAAATCGACCCCTGAACTATGCAAAG  
9-5 GGGTAAGAATCGGGCTCATGGCCGTTTCATAAATGGGAGTTG  
9-6 TTTTTTTTTTTCAGTGTTTCGACGCAGACCTATCTTTTTTTTTT  
10-1 TTTTTTTTTTCTTTGGGAGGTTGTCTGAAATGCAAAGAGCAT  
10-2 GTACGCTCAGTCCACGTGAACGTCTTTGCACCTAGCACACCG  
10-3 CGGCTGCTTCTGCGCTCAGCGGACTCGGCTGCGGGTGCCATT  
10-4 GCGCGTTAACGATTTACTCTAGGATGCGGGATGGCAAAGTCA  
10-5 CAGATCGATGCCATGAGCCCGCGCCAGGCGCGCTTACAGTGC  
10-6 ATTCTTACCCGTCGAACACTGTATAACTCGATTTTTTTTTTT  
11-1 TATTTTCAGACTTTTTTTTTTTTT  
11-2 GTGCAAAGACATGCTCTTTGC  
11-3 CAGCCGAGTCCGGTGTGCTAG  
11-4 TCCCGCATCCAATGGCACCCG  
11-5 GCGCCTGGCGTGACTTTGCCA  
11-6 TCGAGTTATAGCACTGTAAGC

Motif 10 (10H×11T)

| Name | Sequence                                      |
|------|-----------------------------------------------|
| 1-1  | CCGGCTTAGACTGAGCAGCTC                         |
| 1-2  | AATCGCCGAGTATAGACTGAC                         |
| 1-3  | CTAAGCGGTCGTGGATGGTAG                         |
| 1-4  | GAAGTAATCTGACTACGGCCC                         |
| 1-5  | GTATGACTGTAAAGGCACTTA                         |
| 1-6  | AGCTAGACCTTTTTTTTTTTTT                        |
| 2-1  | CTCGGCGATTGAGCTGCTCAGCTGTTCTCCCTTTTTTTTTTTTT  |
| 2-2  | TTCTGTCTGGAAACTATGACGTCTAAGCCGGTTTTTTTTTTTTTT |
| 2-3  | AGATTACTTCTACCATCCACTCGGGATTAAAGAAGTTGCGC     |
| 2-4  | CGTGAAGCTATGACCAGCCCAGACCGCTTAGGTCAGTCTATA    |
| 2-5  | AGGTCTAGCTTAAAGTGCCTTAGCTCCGTCACACCTGGCTTTA   |
| 2-6  | GGAAACACTCTGTAGGCCGTTACAGTCATACGGGCCGTAGTC    |
| 3-1  | GGGAGAACAGCGTCATAGTTTCTAGGAGCTACCGTATTTGAC    |
| 3-2  | TCGCATTATCCCGCCGGCTACCCAGACAGAAGCGCAACTTCT    |
| 3-3  | TTAATCCCGATGGGCTGGTCAATTTTCGGATAAAAGGGTAGGCC  |
| 3-4  | GGCCGGAGGAGCAGCGATGAATAGCTTACGTAAAGCCAGGT     |
| 3-5  | GTGACGGAGCAACGGCCTACAAATAGCACAGATTCCGGGAAG    |
| 3-6  | TTTTTTTTTTTTTGATTCTCAATGAGTGTTCCTTTTTTTTTTTTT |
| 4-1  | TTTTTTTTTTTTTGTCAAATACGAGTGAAAGGGCGGCTGTGGTG  |
| 4-2  | TTTTTTTTTTTTTTCGCCGTTCAGTAGCTCCTAGGTAGCCGGCG  |
| 4-3  | GGATAATGCGAGGCCCTACCCTATCAATGCTATCAACCGGCTT   |
| 4-4  | TTTCCCTCACTGGCCCTAGGCTTATCCGAAATTTTCATCGCTG   |
| 4-5  | CTCCTCCGGCCCTTCCCAGAAATACACTTAGTATTTACTCCTT   |
| 4-6  | CAACACGCTTAAACATAAGGGTCTGTGCTATTATTGAGAATC    |
| 5-1  | TCAACATACGTTATATGCTCGGCCCTTTCACTTGAACGGCGA    |
| 5-2  | AGTGAGGGAAACACCACAGCCCGTGGTGGTCAGTAGACTTTA    |
| 5-3  | AGCTAACACTCCTGTCTGTCGTCATAGCATTGATGCC TAGGGCC |
| 5-4  | TAAGCGTGTGAAAGCCGGTTGCCTGTTTGTATGTATCCGTC     |
| 5-5  | GCTGGTCAGAGGGTACTGCCATACTAAGTGTACCCCTTATGTT   |
| 5-6  | TTTTTTTTTTTTTAAGGAGTAAATTTGTGATGGTTTTTTTTTTTT |
| 6-1  | GACCACCACGCGAGCATATAATTATACGCTTTTTTTTTTTTTTT  |
| 6-2  | AGTCGCTCTCCCTCGTTCATCCGTATGTTGATTTTTTTTTTTTT  |
| 6-3  | AACAAACAGGGCCACGACAGGGCTTAGTATTATCCGACGAGG    |
| 6-4  | CTAGTACCCACAGGGCAGCAGAGTGTAGCTTAAAGTCTACT     |
| 6-5  | CCATCACAAATGGCAGTACCCGTTTGGGAAGCACGCAAATTA    |
| 6-6  | CGATTTACAGCGGCTAAATCTCTGACCAGCGACGGATACAT     |
| 7-1  | AAGCGTATAAGATGAACGAGGTCTTATAACCCCTGTATTAAT    |
| 7-2  | CAGCGAAAGTGTACTCGCGTGGAGAGCGACTCCTCGTCGGAT    |
| 7-3  | AATACTAAGCCTGCTCGCCTGTCAGACCAAGTAGCACAGGTG    |

7-4 AGGGCCGATCCCATAGTCTAATGGGTACTAGTAATTTGCGTG  
7-5 CTTCCCAAACGATTTAGCCGCGTTCGAAACTATTTGAACTAT  
7-6 TTTTTTTTTTTTACCCGATGGTGTGAAATCGTTTTTTTTTTTT  
8-1 TTTTTTTTTTTTATTAATACAAATGCGACATAATCGACTGTGA  
8-2 TTTTTTTTTTTTCTAGCTAGAGGGTTATAAGACACGCGAGTA  
8-3 CACTTTCGCTGCACCTGTGCTGTCCGATTTGACTGATFCCGT  
8-4 TAACGCATTCGAGGTACGTTTACTTGGTCTGATTAGACTATG  
8-5 GGATCGGCCCTATAGTTCAAATTGCCTGTCTTCTATFGAAA  
8-6 TGGAGCGTGGAGCTCTCGGTATAGTTTCGAACCCATCGGGTG  
9-1 ACGTAACCGACATAGGCGGTTTATGTGCGCATFCTAGCTAGA  
9-2 CGAATGCGTTATCACAGTCGACCCTACCCGAGACTTCTCGCG  
9-3 TCTACATAGGCCAGTATTTACTCAAATCGGACAAAACGTACCT  
9-4 TCCACGCTCCAACGGAATCAGACTAGGCGTAAATFCTCAACG  
9-5 AATGCAATCTGTTGTAACCTAAGGACAGGCAATACCGAGAGC  
9-6 TTTTTTTTTTTTTTTCAATAGAAGAATTTATGTTTTTTTTTTTT  
10-1 TCGGGTAGGGACGCGCCTATGGAAGCCGTCTTTTTTTTTTTTT  
10-2 ACTTCCTATAAACATGCACCGTCGGTTACGTTTTTTTTTTTTTT  
10-3 TACGCCTAGTGTGAATACTGGAGCTTCGCACCACCACGCACT  
10-4 ATGTGAATGTCGTATCTGCGCCCTATGTAGACGCGAGAAGTC  
10-5 CATAAATTTCTTAGGTTACAACAGTTCTAGTATTTGTGCGGTAG  
10-6 ATTATAAAGCTAATGAAACTAAGATTGCATTCGTTGAGAATT  
11-1 GGACGGCTTCCGGTGCATGTT  
11-2 ATAGGAAGTAGTGCGTGGTGA  
11-3 GTGCGAAGCTGCGCAGATACG  
11-4 CATTACATCTACCGCACAAT  
11-5 TACTAGAACTTAGTTTCATTA  
11-6 GCTTTATAATTTTTTTTTTTTTTT

Motif 11.1 (10H×11T)

| Name | Sequence                                                                 |
|------|--------------------------------------------------------------------------|
| 1-1  | TCCGCCGTCCGGCGTCTCGGGA                                                   |
| 1-2  | ACTTGTACCAAGAGGCCAGTG                                                    |
| 1-3  | GTCTGTGCCCTAGCTGCATCG                                                    |
| 1-4  | CGTAGACGTTAAGACCTCGGA                                                    |
| 1-5  | AGGTGGTTTATACGGACTGTA                                                    |
| 1-6  | TTTTTTTTTTTTTTAATACCCA                                                   |
| 2-1  | TTTTTTTTTTTGCCCAATGCGTTTTTTTTTTTTTTTTTTTTTTTTTTTTTCCGACGGCGGATTTTTTTTTTT |
| 2-2  | GTGCAGCAAGTCCGTTAACCATTTTTTTTTTTTTTTTTTTTTTTTTTTTTTGGTACAAGTCCCGAGACG    |
| 2-3  | GAATGAACTAGGGATAATAAGTTTTTTTTTTTTTTTTTTTTTTTTTTAGGGCACAGACCACTGGCCTC     |
| 2-4  | ACCGACTAAATGATTGAGTCCTTTTTTTTTTTTTTTTTTTTTTTTTAACTCTACGCGATGCAGCT        |
| 2-5  | TACAAAGTTCAACCATAGACGTTTTTTTTTTTTTTTTTTTTTTTTTATAAAACCACCTTCCGAGGTCT     |
| 2-6  | TGGGATAGTAGACACCTGCCCTTTTTTTTTTTTTTTTTTTTTTTTTTACGCATAGTCCCTACAGTCCGT    |
| 3-1  | AGTTATCCCTCATCGGTTACTTTTTTTTTTTTTTTTTTTTTTTTTCTTGCTGCACACGCATGGGGC       |
| 3-2  | TAGAAGGGCCCTCAAGATGCATTTTTTTTTTTTTTTTTTTTTTTTTTAGTTCATTCTGGTTAACGGA      |
| 3-3  | ATGCGGGCCTAGCATGTAAGCTTTTTTTTTTTTTTTTTTTTTTTTTTAGTCGGTCTTATTATCCC        |
| 3-4  | TCCGTAAATTTAGTTTAGGACTTTTTTTTTTTTTTTTTTTTTTTTTTGAACTTGTAGGACTCAATCA      |
| 3-5  | GTTTACTGCACCAACTTGAAGTTTTTTTTTTTTTTTTTTTTTTTTTACTATCCCACGTCATGGTT        |
| 3-6  | ACTCGCAGCACTTTTTTTTTTTTTTTTTTTTTTTTTTTTTTTTTTTTTTTTTTGGGCAGGTGTC         |
| 4-1  | TTTTTTTTTTTTCACGTGGGCATTTTTTTTTTTTTTTTTTTTTTTTTTGAGGGATAACTTTTTTTTTTTT   |
| 4-2  | CGAGTCCGCGAGGTCCGAATCTTTTTTTTTTTTTTTTTTTTTTTTTTGGGCCCTCTAAGTAACCGAT      |
| 4-3  | CGCGCCAACGGGTGGAGCTGTTTTTTTTTTTTTTTTTTTTTTTTTTAGGCCCGCATTGCATCTTGA       |
| 4-4  | CCATCGCGCCCTAAGTGTATGTTTTTTTTTTTTTTTTTTTTTTTTTAAATTTACGGAGCTTACATGC      |
| 4-5  | GGTACCGGACCGTGGTCACCGTTTTTTTTTTTTTTTTTTTTTTTTTGTGCAGTAAACGTCCTAAACT      |
| 4-6  | AGGTAATCTAATAGCAGCAGTTTTTTTTTTTTTTTTTTTTTTTTTGTGCTGCGAGTCTTCAAGTTG       |
| 5-1  | ACATAGCGAGTCAAACGGTGATTTTTTTTTTTTTTTTTTTTTTTTTTCGCGGACTCGATGCCACGTG      |
| 5-2  | ATGGGCGGGCCGGTCACAAGTTTTTTTTTTTTTTTTTTTTTTTTTCGTTGGCGCGGATTCGGACCT       |
| 5-3  | CCGGAGCCCTAAGTCCGAGGTTTTTTTTTTTTTTTTTTTTTTTTTTGGCGCGATGGACAGCTCCACC      |
| 5-4  | AAGGATCTGGAGGAAGTTCATTTTTTTTTTTTTTTTTTTTTTTTTTGTCCGGTACCATAACACTTAG      |
| 5-5  | TTAGGGAAATAAAGGATTGACTTTTTTTTTTTTTTTTTTTTTTTTTTATAGATTACCTCGGTGACCACG    |
| 5-6  | TCAGCGCTTCATTTTTTTTTTTTTTTTTTTTTTTTTTTTTTTTTTTTTTTTTTACTGCTGCTAT         |
| 6-1  | TTTTTTTTTTTGTATCTGCACATTTTTTTTTTTTTTTTTTTTTTTTTTACTCGCTATGTTTTTTTTTTT    |
| 6-2  | CCGCATGATCCGCAAGAGCTTTTTTTTTTTTTTTTTTTTTTTTTTTGGCCCGCCATTCACCGTTTG       |
| 6-3  | AGTGCTTATGACCCTAAATTGTTTTTTTTTTTTTTTTTTTTTTTTTTAGGGCTCCGGACTTGTGACC      |
| 6-4  | CGTCAGAAAGATAAAGAGGGCTTTTTTTTTTTTTTTTTTTTTTTTTTCCAGATCCTTACCCTCGGACT     |
| 6-5  | CATACGCTGTCCCTAACGTTATTTTTTTTTTTTTTTTTTTTTTTTTTATTTCCCTAATGGAAC TTC      |
| 6-6  | GCCAATCCAGGTTTAAAGAGATTTTTTTTTTTTTTTTTTTTTTTTTTTGAAGCGCTGAGTCAATCCTT     |
| 7-1  | TATTTGGCATCTGACTATAGGTTTTTTTTTTTTTTTTTTTTTTTTTGTATCATGCGGTGTGCAGATAC     |
| 7-2  | GTACGCCCTGACCCACCGATGTTTTTTTTTTTTTTTTTTTTTTTTTCATAAGCACTAAGCTCTTGCG      |
| 7-3  | GTTAAAGGCGTTCGCGAAATTTTTTTTTTTTTTTTTTTTTTTTTCTTTCTGACGCAATTTAGGGT        |

7-4 CCTTTGACTTTCACTGAACAGTTTTTTTTTTTTTTTTTTTTTTTTTTTACAGCGTATGGCCCTCTTTAT  
7-5 GCCCTGACGGGAGCTGCGGGCTTTTTTTTTTTTTTTTTTTTTTTTTTCTGGATTGGCTAACGTTAGGG  
7-6 GACGTTGAATTTTTTTTTTTTTTTTTTTTTTTTTTTTTTTTTTTTTTTTTTCTCTTTAAAC  
8-1 TTTTTTTTTTACAGAAAGGTCTTTTTTTTTTTTTTTTTTTTTTTTGATGCCAAATATTTTTTTTTTT  
8-2 TGGCGGTTGGATTAATTAGGCTTTTTTTTTTTTTTTTTTTTTTTTTCAGGGCGTACCCTATAGTCA  
8-3 AATCCCTGTGGCTACCGAGGCTTTTTTTTTTTTTTTTTTTTTTTTACGCCTTAACCATCGGTGGG  
8-4 AACTGAAGCGGCTTGGCCACTTTTTTTTTTTTTTTTTTTTTTTTAAAGTCAAAGGAATTTTCGCGA  
8-5 ACCGTGACGCAACTAAACAATTTTTTTTTTTTTTTTTTTTTTTTCCCGTCAGGGCCTGTTTCAGTG  
8-6 GGACTCTATCCCTACGGAACCTTTTTTTTTTTTTTTTTTTTTTTAATTCAACGTCGCCCGCAGCT  
9-1 GGGACCCTTCACTAACGACCATTTTTTTTTTTTTTTTTTTTTTTCCAACCGCCAGACCTTTCGT  
9-2 GCCTGATATTGCAATCACTCCTTTTTTTTTTTTTTTTTTTTTTTTTCACAGGGATTGCCTAATTAAT  
9-3 GGGTACCGACTCCCTTTACGGTTTTTTTTTTTTTTTTTTTTTTTCGCTTCAGTTGCCTCGGTAGC  
9-4 CTTCCGAGAAGTCATTTGGAATTTTTTTTTTTTTTTTTTTTTTTTGCCTCACGGTAGTGGCCAAGC  
9-5 GTCTCAGGCGCTTGAGAATGATTTTTTTTTTTTTTTTTTTTTTTTGATAGAGTCCATTGTTTAGTT  
9-6 TCGAACACTTCTTTTTTTTTTTTTTTTTTTTTTTTTTTTTTTTTTTTTTTTTTTTGGTTCCGTAGG  
10-1 TTTTTTTTTTTCACATAGGCCGTTTTTTTTTTTTTTTTTTTTTTTGAAGGGTCCCTTTTTTTTTTTT  
10-2 CCCACCTAGAAGAAGAAAGGGTTTTTTTTTTTTTTTTTTTTTTTCAATATCAGGCTGGTCGTTAG  
10-3 TAGAACTGAGAGACAGGGCTATTTTTTTTTTTTTTTTTTTTTTTTAGTCGGTACCCGGAGTGATTG  
10-4 TATAGCGCTCTGTGGCGCATTTTTTTTTTTTTTTTTTTTTTTCTTCTCGGAAGCCGTAAAGGG  
10-5 CTGGCGGTACCATAAACTCGCTTTTTTTTTTTTTTTTTTTTTTTTGCCTGAGACTTCCAAATGA  
10-6 ATTTCCCTGACCTTGAGGGAGTTTTTTTTTTTTTTTTTTTTTTTGAAGTGTTTCGATCATCTCAA  
11-1 TCTAGGTGGGCGGCTATGTG  
11-2 CTCAGTTCTACCCTTTCTTCT  
11-3 ACGCGCTATATAGCCCTGTCT  
11-4 GTACCGCCAGTCGCGCCACAG  
11-5 TCAGGGAAATGCGAGTTTATG  
11-6 TTTTTTTTTTCTCCCTCAAGG

Motif 11.2 (10H×11T)

| Name | Sequence                                                       |
|------|----------------------------------------------------------------|
| 1-1  | TCCGCCGTCGGCGTCTCGGGA                                          |
| 1-2  | ACTTGTACCAAGAGGCCAGTG                                          |
| 1-3  | GTCTGTGCCCTAGCTGCATCG                                          |
| 1-4  | CGTAGACGTTAAGACCTCGGA                                          |
| 1-5  | AGGTGGTTTTATACGGACTGTA                                         |
| 1-6  | TTTTTTTTTTTTTTAATACCCA                                         |
| 2-1  | TTTTTTTTTTTGCCCAATGCGTTGGAAGGGATGGAGGATCCGACGGCGGATTTTTTTTTTT  |
| 2-2  | GTGCAGCAAGTCCGTTAACCATGGAAGGGATGGAGGATTTGGTACAAGTCCCGAGACG     |
| 2-3  | GAATGAACTAGGGATAATAAGTGAAGGGATGGAGGATAGGGCACAGACCACTGGCCCT     |
| 2-4  | ACCGACTAAATGATTGAGTCCCTGGAAGGGATGGAGGATTAACGTCTACGCGATGCAGCT   |
| 2-5  | TACAAAGTTCAACCATAGACGTGGAAGGGATGGAGGATATAAACACCTCCGAGGTCT      |
| 2-6  | TGGGATAGTAGACACCTGCCCTGGAAGGGATGGAGGATACGCATAGTCCCTACAGTCCGT   |
| 3-1  | AGTTATCCCTCATCGGTTACTTGAAGGGATGGAGGATCTTGCTGCACACGCATTGGGC     |
| 3-2  | TAGAAGGGCCCTCAAGATGCATGGAAGGGATGGAGGATTAGTTCATTCTGGTTAACGGA    |
| 3-3  | ATGCGGGCCTAGCATGTAAGCTGGAAGGGATGGAGGATTTTAGTCGGTCTTATTATCCC    |
| 3-4  | TCCGTAATAATTTAGTTTAGGACTGGAAGGGATGGAGGATGAACTTTGTAGGACTCAATCA  |
| 3-5  | GTTTACTGCACCAACTTGAAGTGAAGGGATGGAGGATTAATATCCCACGCTATGGTT      |
| 3-6  | ACTCGCAGCACTTTTTTTTTTTTGAAGGGATGGAGGATTTTTTTTTTTGGGCAGGTGTC    |
| 4-1  | TTTTTTTTTTTTCACGTGGGCATTGGAAGGGATGGAGGATGAGGGATAACTTTTTTTTTTTT |
| 4-2  | CGAGTCCGCGAGGTCCGAATCTGGAAGGGATGGAGGATGGGCCCTTCTAAGTAACCGAT    |
| 4-3  | CGCGCCAACGGGTGGAGCTGTTGGAAGGGATGGAGGATTAGGCCCGCATTGCATCTTGA    |
| 4-4  | CCATCGCGCCCTAAGTGTATGTGGAAGGGATGGAGGATAAATTTACGGAGCTTACATGC    |
| 4-5  | GGTACCGGACCGTGGTCACCGTGAAGGGATGGAGGATGTGCAGTAAACGTCCATAACT     |
| 4-6  | AGGTAATCTAATAGCAGCAGTTGGAAGGGATGGAGGATGTGCTGCGAGTCTCAAGTTG     |
| 5-1  | ACATAGCGAGTCAAACGGTGATGGAAGGGATGGAGGATCGCGGACTCGATGCCACGTCG    |
| 5-2  | ATGGGCGGGCCGGTCACAAGTTGGAAGGGATGGAGGATCGTTGGCGCGGATTCGGACCT    |
| 5-3  | CCGGAGCCCTAAGTCCGAGGTTGGAAGGGATGGAGGATGGCGCGATGGACAGCTCCACC    |
| 5-4  | AAGGATCTGGAGGAAGTTCCATGGAAGGGATGGAGGATGTCCGGTACCCATACACTTAG    |
| 5-5  | TTAGGGAAATAAAGGATTGACTGGAAGGGATGGAGGATTAGATTACCTCGGTGACCACG    |
| 5-6  | TCAGCGCTTCATTTTTTTTTTTTGAAGGGATGGAGGATTTTTTTTTTTACTGCTGCTAT    |
| 6-1  | TTTTTTTTTTTGTATCTGCACATGGAAGGGATGGAGGATACTCGCTATGTTTTTTTTTTTT  |
| 6-2  | CCGCATGATCCGCAAGAGCTTTGGAAGGGATGGAGGATGGCCCCGCCATTCACCGTTTG    |
| 6-3  | AGTGCTTATGACCCTAAATTGTGGAAGGGATGGAGGATTAGGGCTCCGGACTTGTGACC    |
| 6-4  | CGTCAGAAAGATAAAGAGGGCTGGAAGGGATGGAGGATTCAGATCCTTACCTCGGACT     |
| 6-5  | CATACGCTGTCCCTAACGTTATGGAAGGGATGGAGGATTAATTTCCCTAATGGAACCTCC   |
| 6-6  | GCCAATCCAGGTTTAAAGAGATGGAAGGGATGGAGGATGAAGCGCTGAGTCAATCCTT     |
| 7-1  | TATTTGGCATCTGACTATAGGTGGAAGGGATGGAGGATGATCATGCGGTGTGCAGATAC    |
| 7-2  | GTACGCCCTGACCCACCGATGTGGAAGGGATGGAGGATCATAAGCACTAAGCTCTTGCG    |
| 7-3  | GTTAAAGGCGTTCCGCAAAATTTGGAAGGGATGGAGGATCTTCTGACGCAATTTAGGGT    |

7-4 CCTTTGACTTTCACTGAACAGTGGAAAGGGATGGAGGATACAGCGTATGGCCCTCTTTAT  
7-5 GCCCTGACGGGAGCTGCGGGCTGGAAGGGATGGAGGATCTGGATTGGCTAACGTTAGGG  
7-6 GACGTTGAATTTTTTTTTTTTTTTTGGAAAGGGATGGAGGATTTTTTTTTTTTCTCTTTAAAC  
8-1 TTTTTTTTTTACAGAAAGGTCTGGAAGGGATGGAGGATGATGCCAAATATTTTTTTTTTT  
8-2 TGGCGGTTGGATTAATTAGGCTGGAAGGGATGGAGGATTCAGGGCGTACCCTATAGTCA  
8-3 AATCCCTGTGGCTACCGAGGCTGGAAGGGATGGAGGATACGCCTTTAACCATCGGTGGG  
8-4 AACTGAAGCGGCTTGGCCACTTGGAAAGGGATGGAGGATAAAGTCAAAGGAATTTTCGCGA  
8-5 ACCGTGACGCAACTAAACAATTGGAAGGGATGGAGGATCCCGTCAGGGCCTGTTTCAGTG  
8-6 GGACTCTATCCCTACGGAACCTGGAAGGGATGGAGGATAATTCAACGTCGCCCCGAGCT  
9-1 GGGACCCTTCACTAACGACCATGGAAGGGATGGAGGATCCAACCGCCAGACCTTCTGT  
9-2 GCCTGATATTGCAATCACTCCTGGAAGGGATGGAGGATCACAGGGATTGCCAATTAAT  
9-3 GGGTACCGACTCCCTTTACGGTGGAAAGGGATGGAGGATCGCTTCAGTTGCCCTCGGTAGC  
9-4 CTTCCGAGAAGTCATTTGGAATGGAAGGGATGGAGGATGCGTCACGGTAGTGGCCAAGC  
9-5 GTCTCAGGGCCTTGAGAATGATGGAAGGGATGGAGGATGATAGAGTCCATTGTTTAGTT  
9-6 TCGAACACTTCTTTTTTTTTTTTTTGGAAAGGGATGGAGGATTTTTTTTTTTTGGTTCCGTAGG  
10-1 TTTTTTTTTTTCACATAGGCCGTGGAAGGGATGGAGGATTGAAGGGTCCCTTTTTTTTTTTT  
10-2 CCCACCTAGAAGAAGAAAGGGTGGAAAGGGATGGAGGATCAATATCAGGCTGGTCGTTAG  
10-3 TAGAACTGAGAGACAGGGCTATGGAAGGGATGGAGGATAGTCGGTACCCGGAGTGATTG  
10-4 TATAGCGGTCTGTGGCGCGATGGAAGGGATGGAGGATCTTCTCGGAAGCCGTAAAGGG  
10-5 CTGGCGGTACCATAAACTCGCTGGAAGGGATGGAGGATGCGCCTGAGACTTCCAAATGA  
10-6 ATTTCCCTGACCTTGAGGGAGTGGAAAGGGATGGAGGATGAAGTGTTCGATCATTTCTCAA  
11-1 TCTAGGTGGGCGGCCCTATGTG  
11-2 CTCAGTTCTACCCTTTCTTCT  
11-3 ACGCGCTATATAGCCCTGTCT  
11-4 GTACCGCCAGTCGCGCCACAG  
11-5 TCAGGGAAATGCGAGTTTATG  
11-6 TTTTTTTTTTCTCCCTCAAGG

Motif 11.3 (10H×11T)

| Name | Sequence                                                 |
|------|----------------------------------------------------------|
| 1-1  | TCCGCCGTCCGGCGTCTCGGGA                                   |
| 1-2  | ACTTGTACCAAGAGGCCAGTG                                    |
| 1-3  | GTCTGTGCCCTAGCTGCATCG                                    |
| 1-4  | CGTAGACGTTAAGACCTCGGA                                    |
| 1-5  | AGGTGGTTTATACGGACTGTA                                    |
| 1-6  | TTTTTTTTTTTTTTAATACCCA                                   |
| 2-1  | TTTTTTTTTTTGCCCAATGCGTTTTTTTTTTTTCCGACGGCGGATTTTTTTTTTT  |
| 2-2  | GTGCAGCAAGTCCGTTAACCATTTTTTTTTTTTTTGGTACAAGTTCCCGAGACG   |
| 2-3  | GAATGAACTAGGGATAATAAGTTTTTTTTTTTAGGGCACAGACCACTGGCCCTC   |
| 2-4  | ACCGACTAAATGATTGAGTCCTTTTTTTTTTTTAACGTCTACGCGATGCAGCT    |
| 2-5  | TACAAAGTTCAACCATAGACGTTTTTTTTTTTTATAAAACCACCTTCCGAGGTCT  |
| 2-6  | TGGGATAGTAGACACCTGCCCTTTTTTTTTTTTACGCATAGTCCACAGTCCGT    |
| 3-1  | AGTTATCCCTCATCGGTTACTTTTTTTTTTTTCTTGCTGCACACGCATTGGGC    |
| 3-2  | TAGAAGGGCCCTCAAGATGCATTTTTTTTTTTTAGTTCATTCTGGTTAACGGA    |
| 3-3  | ATGCGGGCCTAGCATGTAAGCTTTTTTTTTTTTTTAGTCGGTCTTATTATCCC    |
| 3-4  | TCCGTAAATTTAGTTTAGGACTTTTTTTTTTTGAACTTTGTAGGACTCAATCA    |
| 3-5  | GTTTACTGCACCAACTTGAAGTTTTTTTTTTTTACTATCCCACGCTATGGTT     |
| 3-6  | ACTCGCAGCACTTTTTTTTTTTTTTTTTTTTTTTTTTTTTTTGGGCAGGTGTC    |
| 4-1  | TTTTTTTTTTTTCACGTGGGCATTTTTTTTTTTTGAGGGATAACTTTTTTTTTTTT |
| 4-2  | CGAGTCCGCGAGGTCCGAATCTTTTTTTTTTTGGGCCCTTCTAAGTAACCGAT    |
| 4-3  | CGCGCCAACGGGTGGAGCTGTTTTTTTTTTTTTAGGCCCGCATTGCATCTTGA    |
| 4-4  | CCATCGCGCCCTAAGTGTATGTTTTTTTTTTAAATTTACGGAGCTTACATGC     |
| 4-5  | GGTACCGGACCGTGGTCACCGTTTTTTTTTTTGTGCAGTAAACGTCCTAAACT    |
| 4-6  | AGGTAATCTAATAGCAGCAGTTTTTTTTTTTTGTGCTGCGAGTCTTCAAGTTG    |
| 5-1  | ACATAGCGAGTCAAACGGTGATTTTTTTTTTTTCGCGGACTCGATGCCACGTCG   |
| 5-2  | ATGGGCGGGCCGGTCACAAGTTTTTTTTTTTCGTTGGCGCGGATTCGGACCT     |
| 5-3  | CCGGAGCCCTAAGTCCGAGGTTTTTTTTTTTTGGCGCGATGGACAGCTCCACC    |
| 5-4  | AAGGATCTGGAGGAAGTTCATTTTTTTTTTTGTCCGGTACCCATACACTTAG     |
| 5-5  | TTAGGGAAATAAAGGATTGACTTTTTTTTTTTTAGATTACCTCGGTGACCACG    |
| 5-6  | TCAGCGCTTCATTTTTTTTTTTTTTTTTTTTTTTTTTTTACTGCTGCTAT       |
| 6-1  | TTTTTTTTTTTGTATCTGCACATTTTTTTTTTTACTCGCTATGTTTTTTTTTTT   |
| 6-2  | CCGCATGATCCGCAAGAGCTTTTTTTTTTTTTGGCCCGCCATTCACCGTTTG     |
| 6-3  | AGTGCTTATGACCCTAAATTGTTTTTTTTTTTTAGGGCTCCGGACTTGTGACC    |
| 6-4  | CGTCAGAAAGATAAAGAGGGCTTTTTTTTTTTCCAGATCCTTACCTCGGACT     |
| 6-5  | CATACGCTGTCCCTAACGTTATTTTTTTTTTTATTTCCCTAATGGAACCTCC     |
| 6-6  | GCCAATCCAGGTTTAAAGAGATTTTTTTTTTTTGAAGCGCTGAGTCAATCCTT    |
| 7-1  | TATTTGGCATCTGACTATAGGTTTTTTTTTTGATCATGCGGTGTGCAGATAC     |
| 7-2  | GTACGCCCTGACCCACCGATGTTTTTTTTTTTCATAAGCACTAAGCTCTTGCCG   |
| 7-3  | GTAAAGGCGTTCGCGAAATTTTTTTTTTTTCTTCTGACGCAATTTAGGGT       |

7-4 CCTTTGACTTTCACTGAACAGTTTTTTTTTTTACAGCGTATGGCCCTCTTTAT  
7-5 GCCCTGACGGGAGCTGCGGGCTTTTTTTTTTCTGGATTGGCTAACGTTAGGG  
7-6 GACGTTGAATTTTTTTTTTTTTTTTTTTTTTTTTTTTTTTTTTCTCTTTAAAC  
8-1 TTTTTTTTTTACAGAAAGGTCTTTTTTTTTTGGATGCCAAATATTTTTTTTTT  
8-2 TGGCGGTTGGATTAATTAGGCTTTTTTTTTTTCAGGGCGTACCCTATAGTCA  
8-3 AATCCCTGTGGCTACCGAGGCTTTTTTTTTTACGCCTTAACCATCGGTGGG  
8-4 AACTGAAGCGGCTTGGCCACTTTTTTTTTTTAAAGTCAAAGGAATTTTCGCGA  
8-5 ACCGTGACGCAACTAAACAATTTTTTTTTTCCCGTCAGGGCTGTTTCAGTG  
8-6 GGACTCTATCCCTACGGAACCTTTTTTTTTTTAATTCAACGTCGCCCCGAGCT  
9-1 GGGACCCTTCACTAACGACCATTTTTTTTTTCCAACCGCCAGACCTTCTGT  
9-2 GCCTGATATTGCAATCACTCCTTTTTTTTTTTCACAGGGATTGCCTAATTAAT  
9-3 GGGTACCGACTCCCTTTACGGTTTTTTTTTTCGCTTCAGTTGCCTCGGTAGC  
9-4 CTTCCGAGAAGTCATTTGGAATTTTTTTTTTTCGCTCACGGTAGTGGCCAAGC  
9-5 GTCTCAGGCGCTTGAGAATGATTTTTTTTTTGGATAGAGTCCATTGTTTAGTT  
9-6 TCGAACACTTCTTTTTTTTTTTTTTTTTTTTTTTTTTTTTTTTTTGGTTCCGTAGG  
10-1 TTTTTTTTTTTCACATAGGCCGTTTTTTTTTTTGAAGGGTCCCTTTTTTTTTTT  
10-2 CCCACCTAGAAGAAGAAAGGGTTTTTTTTTTCAATATCAGGCTGGTCGTTAG  
10-3 TAGAACTGAGAGACAGGGCTATTTTTTTTTTTAGTCGGTACCCGGAGTGATTG  
10-4 TATAGCGGTCTGTGGCGCGATTTTTTTTTTCTTCTCGGAAGCCGTAAAGGG  
10-5 CTGGCGGTACCATAAACTCGCTTTTTTTTTTTGCGCCTGAGACTTCCAAATGA  
10-6 ATTTCCCTGACCTTGAGGGAGTTTTTTTTTTGAAGTGTTTCGATCATTTCTCAA  
11-1 TCTAGGTGGGCGGCTATGTG  
11-2 CTCAGTTCTACCCTTTCTTCT  
11-3 ACGCGCTATATAGCCCTGTCT  
11-4 GTACCGCCAGTCGCGCCACAG  
11-5 TCAGGGAAATGCGAGTTTATG  
11-6 TTTTTTTTTTCTCCCTCAAGG

Motif 11.4 (10H×11T)

| Name | Sequence                                        |
|------|-------------------------------------------------|
| 1-1  | TCCGCCGTCCGGCGTCTCGGGA                          |
| 1-2  | ACTTGTACCAAGAGGCCAGTG                           |
| 1-3  | GTCTGTGCCCTAGCTGCATCG                           |
| 1-4  | CGTAGACGTTAAGACCTCGGA                           |
| 1-5  | AGGTGGTTTATACGGACTGTA                           |
| 1-6  | TTTTTTTTTTTTTTAATACCCA                          |
| 2-1  | TTTTTTTTTTTGCCCAATGCGTTTCCGACGGCGGATTTTTTTTTTT  |
| 2-2  | GTGCAGCAAGTCCGTTAACCATTTTGGTACAAGTTCCCGAGACG    |
| 2-3  | GAATGAACTAGGGATAATAAGTTAGGGCACAGACCACTGGCCTC    |
| 2-4  | ACCGACTAAATGATTGAGTCCTTTAACGTCTACGCGATGCAGCT    |
| 2-5  | TACAAAGTTCAACCATAGACGTTATAAAACCACCTTCCGAGGTCT   |
| 2-6  | TGGGATAGTAGACACCTGCCCTTACGCATAGTCCCTACAGTCCGT   |
| 3-1  | AGTTATCCCTCATCGGTTACTTTCTTGCTGCACACGCATTGGGC    |
| 3-2  | TAGAAGGGCCCTCAAGATGCATTTAGTTCATTCTGGTTAACGGA    |
| 3-3  | ATGCGGGCCTAGCATGTAAGCTTTTTTAGTCGGTCTTATTATCCC   |
| 3-4  | TCCGTAAATTTAGTTTAGGACTTGAACTTGTAGGACTCAATCA     |
| 3-5  | GTTTACTGCACCAACTTGAAGTTTACTATCCCACGTCTATGGTT    |
| 3-6  | ACTCGCAGCACTTTTTTTTTTTTTTTTTTTTTTTGGGCAGGTGTC   |
| 4-1  | TTTTTTTTTTTTCACGTGGGCATTTGAGGGATAACTTTTTTTTTTTT |
| 4-2  | CGAGTCCCGGAGGTCCGAATCTTGGGCCCTTCTAAGTAACCGAT    |
| 4-3  | CGCGCCAACGGGTGGAGCTGTTTTAGGCCCGCATTCATCTTGA     |
| 4-4  | CCATCGCGCCCTAAGTGTATGTTAAATTTACGGAGCTTACATGC    |
| 4-5  | GGTACCGGACCGTGGTCACCGTTGTGCAGTAAACGTCCTAAACT    |
| 4-6  | AGGTAATCTAATAGCAGCAGTTTGTGCTGCGAGTCTTCAAGTTG    |
| 5-1  | ACATAGCGAGTCAAACGGTGATTCGCGGACTCGATGCCACGTC     |
| 5-2  | ATGGGCGGGCCGGTCACAAGTTTCGTTGGCGCGGATTCGGACCT    |
| 5-3  | CCGGAGCCCTAAGTCCGAGGTTTGGCGCGATGGACAGCTCCACC    |
| 5-4  | AAGGATCTGGAGGAAGTTCCATTGTCCGGTACCCATACACTTAG    |
| 5-5  | TTAGGGAAATAAAGGATTGACTTTAGATTACCTCGGTGACCACG    |
| 5-6  | TCAGCGCTTCATTTTTTTTTTTTTTTTTTTTTTTACTGCTGCTAT   |
| 6-1  | TTTTTTTTTTTGTATCTGCACATTACTCGCTATGTTTTTTTTTTTT  |
| 6-2  | CCGCATGATCCGCAAGAGCTTTTGGCCCGCCATTCACCGTTTG     |
| 6-3  | AGTGCTTATGACCCTAAATTGTTTAGGGCTCCGGACTTGTGACC    |
| 6-4  | CGTCAGAAAGATAAAGAGGGCTTTCCAGATCCTTACCTCGGACT    |
| 6-5  | CATACGCTGTCCCTAACGTTATTTATTTCCCTAATGGAACCTTCC   |
| 6-6  | GCCAATCCAGGTTTAAAGAGATTTGAAGCGCTGAGTCAATCCTT    |
| 7-1  | TATTTGGCATCTGACTATAGGTTGATCATGCGGTGTGCAGATAC    |
| 7-2  | GTACGCCCTGACCCACCGATGTTTATAAAGCACTAAGCTCTTGCG   |
| 7-3  | GTTAAAGGCGTTCCGCAAAATTTCTTTCTGACGCAATTTAGGGT    |

7-4 CCTTTGACTTTTCACTGAACAGTTACAGCGTATGGCCCTCTTTAT  
7-5 GCCCTGACGGGAGCTGCGGGCTTCTGGATTGGCTAACGTTAGGG  
7-6 GACGTTGAATTTTTTTTTTTTTTTTTTTTTTTTTTTCTCTTTAAAC  
8-1 TTTTTTTTTTACAGAAAGGTCTTGATGCCAAATATTTTTTTTTT  
8-2 TGGCGGTTGGATTAATTAGGCTTTCAGGGCGTACCCATATAGTCA  
8-3 AATCCCTGTGGCTACCGAGGCTTACGCCTTAACCATCGGTGGG  
8-4 AACTGAAGCGGCTTGGCCACTTTAAAGTCAAAGGAATTTTCGCGA  
8-5 ACCGTGACGCAACTAAACAATTTCCCGTCAGGGCTGTTTCAGTG  
8-6 GGACTCTATCCCTACGGAACCTTAATTCAACGTCGCCCGCAGCT  
9-1 GGGACCTTCACTAACGACCATTCCAACCGCCAGACCTTTCTGT  
9-2 GCCTGATATTGCAATCACTCCTTCACAGGGATTGCCTAATTAAT  
9-3 GGGTACCGACTCCCTTTACGGTTCGCTTCAGTTGCCTCGGTAGC  
9-4 CTTCCGAGAAGTCATTTGGAATTGCGTCACGGTAGTGGCCAAGC  
9-5 GTCTCAGGGCGCTTGAGAATGATTGATAGAGTCCATTGTTTAGTT  
9-6 TCGAACACTTCTTTTTTTTTTTTTTTTTTTTTTTTTTGGTTCCGTAGG  
10-1 TTTTTTTTTTTCACATAGGCCGTTTGAAGGGTCCCTTTTTTTTTTT  
10-2 CCCACCTAGAAGAAGAAAGGGTTCAATATCAGGCTGGTCGTTAG  
10-3 TAGAACTGAGAGACAGGGCTATTAGTCGGTACCCGGAGTGATTG  
10-4 TATAGCGCGTCTGTGGCGCGATTCTTCTCGGAAGCCGTAAAGG  
10-5 CTGGCGGTACCATAAACTCGCTTGCGCCTGAGACTTCCAAATGA  
10-6 ATTTCCCTGACCTTGAGGGAGTTGAAGTGTTTCGATCATTTCTCAA  
11-1 TCTAGGTGGGCGGCCCTATGTG  
11-2 CTCAGTTCTACCCTTTCTTCT  
11-3 ACGCGCTATATAGCCCTGTCT  
11-4 GTACCGCCAGTCGCGCCACAG  
11-5 TCAGGGAAATGCGAGTTTATG  
11-6 TTTTTTTTTTCTCCCTCAAGG

Motif 12 (5 square × 5 square)

| Name | Sequence                                                                     |
|------|------------------------------------------------------------------------------|
| 1_1  | TCCGCCGTCGGTTTTTTTTTTTCGTCTCGGGA                                             |
| 1_2  | ACTTGTACCAATTTTTTTTTTTGAGGCCAGTG                                             |
| 1_3  | GTCTGTGCCCTTTTTTTTTTTAGCTGCATCG                                              |
| 1_4  | CGTAGACGTTATTTTTTTTTTTAGACCTCGGA                                             |
| 1_5  | AGGTGGTTATTTTTTTTTTTTACGGACTGTA                                              |
| 1_6  | TTTTTTTTTTTTTTTTTTTTTTTAATACCCA                                              |
| 2_1  | TTTTTTTTTTTTTTTTTTTGCCCAATGCGTTTTTTTTTTTCCGACGGCGGATTTTTTTTTTTTTTTTTTT       |
| 2_2  | GTGCAGCAAGTTTTTTTTTTTCCGTTAACCAATTTTTTTTTTTTGGTACAAGTTTTTTTTTTTTTCCCGAGACG   |
| 2_3  | GAATGAACTATTTTTTTTTTTGGGATAATAAGTTTTTTTTTTTAGGGCACAGACTTTTTTTTTTCACTGGCCTC   |
| 2_4  | ACCGACTAAATTTTTTTTTTTGATTGAGTCCTTTTTTTTTTTAACGTCTACGTTTTTTTTTTTCGATGCAGCT    |
| 2_5  | TACAAAGTTCTTTTTTTTTTTAACCATAGACGTTTTTTTTTTTATAAACACCTTTTTTTTTTTTTCCGAGGTCT   |
| 2_6  | TGGGATAGTATTTTTTTTTTTGACACCTGCCCTTTTTTTTTTTACGCATAGTCCTTTTTTTTTTTACAGTCCGT   |
| 3_2  | AGTTATCCCTCTTTTTTTTTTTCATCGGTTACTTTTTTTTTTCTTGCTGCACCTTTTTTTTTTTACGCATTGGGC  |
| 3_3  | TAGAAGGGCCCTTTTTTTTTTCTCAAGATGCTTTTTTTTTTTAGTTCATTCCTTTTTTTTTTTGGTTAACGGA    |
| 3_4  | ATGCGGGCCTATTTTTTTTTTTAGCATGTAAGTTTTTTTTTTTTTAGTCGGTTTTTTTTTTTTCTTATTATCCC   |
| 3_5  | TCCGTAATTTTTTTTTTTTTTAGTTTAGGATTTTTTTTTTTGAACTTTGTATTTTTTTTTTTGGACTCAATCA    |
| 3_6  | GTTTACTGCACCTTTTTTTTTTTCCAACTTGAATTTTTTTTTTTACTATCCCATTTTTTTTTTTTCGCTATGGTT  |
| 3_1  | ACTCGCAGCACTTTTTTTTTTCTTTTTTTTTTTTTTTTTTTTTTTTTTTTTTTTTTTTTTTTTTTGGCAGGTGTC  |
| 4_1  | TTTTTTTTTTTTTTTTTTTTTTCACGTGGGCATTTTTTTTTTTGAGGGATAACTTTTTTTTTTTTTTTTTTTT    |
| 4_2  | CGAGTCCGCGTTTTTTTTTTTAGGTCCGAATCTTTTTTTTTTTGGGCCCTTCTATTTTTTTTTTTAGTAACCGAT  |
| 4_3  | CGCGCCAACGTTTTTTTTTTTGGTGGAGCTGTTTTTTTTTTTTTAGGCCCGCATTTTTTTTTTTTTGCATCTTGA  |
| 4_4  | CCATCGCGCCTTTTTTTTTTTCTAAGTGTATGTTTTTTTTTTTAAATTTACGGATTTTTTTTTTTGCTTACATGC  |
| 4_5  | GGTACCGGACTTTTTTTTTTTTCGTGGTCACCGTTTTTTTTTTTGTGCAGTAAACTTTTTTTTTTTGCTTAAACT  |
| 4_6  | AGGTAATCTATTTTTTTTTTTATAGCAGCAGTTTTTTTTTTTTGTGCTGCGAGTTTTTTTTTTTTCTTCAAGTTG  |
| 5_2  | ACATAGCGAGTTTTTTTTTTTTCAAACGGTGTTTTTTTTTTTTCGCGGACTCGTTTTTTTTTTATGCCACGTCG   |
| 5_3  | ATGGGCGGGCCTTTTTTTTTTTTCGGTCCAAAGTTTTTTTTTTTCGTTGGCGCGTTTTTTTTTTGATTCGGACCT  |
| 5_4  | CCGGAGCCCTATTTTTTTTTTTAAGTCCGAGGTTTTTTTTTTTTGGCGCGATGTTTTTTTTTTACAGCTCCACC   |
| 5_5  | AAGGATCTGGATTTTTTTTTTTTAGGAAGTTCCTTTTTTTTTTTGTCCGGTACCTTTTTTTTTTTCATACACTTAG |
| 5_6  | TTAGGAAATATTTTTTTTTTTAAAGGATTGATTTTTTTTTTTTAGATTACCTTTTTTTTTTTTCGGTGACCACG   |
| 5_1  | TCAGCGCTTCATTTTTTTTTTTATTTTTTTTTTTTTTTTTTTTTTTTTTTTTTTTTTTTTTTACTGCTGCTAT    |
| 6_1  | TTTTTTTTTTTTTTTTTTTTTGTATCTGCACATTTTTTTTTTTACTCGCTATGTTTTTTTTTTTTTTTTTTTT    |
| 6_2  | CCGCATGATCTTTTTTTTTTTTCGCAAGAGCTTTTTTTTTTTTTGGCCCGCCATTTTTTTTTTTTTTACCCTTG   |
| 6_3  | AGTGCTTATGTTTTTTTTTTTACCCTAAATGTTTTTTTTTTTTAGGGCTCCGGTTTTTTTTTTACTTGTGACC    |
| 6_4  | CGTCAGAAAAGTTTTTTTTTTTATAAAGAGGGCTTTTTTTTTTTTCCAGATCCTTTTTTTTTTTTTACCTCGGACT |
| 6_5  | CATACGCTGTTTTTTTTTTTTCCCTAACGTTATTTTTTTTTTTTATTTCCCTAAATTTTTTTTTTTTGGAACTCC  |
| 6_6  | GCCAATCCAGTTTTTTTTTTTGTAAAGAGATTTTTTTTTTTTGAAGCGCTGATTTTTTTTTTTGTCAATCCTT    |
| 7_2  | TATTTGGCATCTTTTTTTTTTTCTGACTATAGTTTTTTTTTTTGATCATGCGGTTTTTTTTTTTTGTGCAGATAC  |
| 7_3  | GTACGCCCTGATTTTTTTTTTTTACCACCGATTTTTTTTTTTTCATAAGCACTTTTTTTTTTTTAAGCTCTTGCG  |
| 7_4  | GTTAAAGCGTTTTTTTTTTTTTTCGCGAAATTTTTTTTTTTCTTTCTGACGTTTTTTTTTTCAATTTAGGGT     |

7\_5 CCTTTGACTTTTTTTTTTTTTTTTCACTGAACATTTTTTTTTTTTACAGCGTATGTTTTTTTTTTGCCCCTCTTTAT  
7\_6 GCCCTGACGGGTTTTTTTTTTTGGAGCTGCGGGTTTTTTTTTTCTGGATTGGCTTTTTTTTTTTAACGTTAGGG  
7\_1 GACGTTGAATTTTTTTTTTTTTTTTTTTTTTTTTTTTTTTTTTTTTTTTTTTTTTTTTTTTTTTTTTTTTTCTCTTAAAC  
8\_1 TTTTTTTTTTTTTTTTTTTTACAGAAAGGCTTTTTTTTTTTGATGCCAAATATTTTTTTTTTTTTTTTTTTTT  
8\_2 TGGCGGTTGGTTTTTTTTTTTATTAATTAGGCTTTTTTTTTTTTTCAGGGCGTACTTTTTTTTTTCCATATAGTCA  
8\_3 AATCCCTGTGTTTTTTTTTTTGCTACCGAGGCTTTTTTTTTTTACGCCTTAACTTTTTTTTTTTCATCGGTGGG  
8\_4 AACTGAAGCGTTTTTTTTTTTGCTTGCCACTTTTTTTTTTTAAAGTCAAAGGTTTTTTTTTTAATTTTCGCGA  
8\_5 ACCGTGACGCTTTTTTTTTTTAACTAAACAATTTTTTTTTTTCCCGTCAGGGCTTTTTTTTTTCTGTTCAAGT  
8\_6 GGACTCTATCTTTTTTTTTTTCCCTACGGAACCTTTTTTTTTTTAATTCACAGTCTTTTTTTTTTTGCCCGCAGCT  
9\_2 GGGACCTTCATTTTTTTTTTTACTAACGACCTTTTTTTTTTTCCAACCGCCATTTTTTTTTTTGACCTTTCTGT  
9\_3 GCCTGATATTGTTTTTTTTTTTGAATCACTCTTTTTTTTTTTTACAGGGATTTTTTTTTTTTTGCCTAATTAAT  
9\_4 GGGTACCGACTTTTTTTTTTTTCCCTTTACGTTTTTTTTTTTCGCTTCAGTTTTTTTTTTTTGCCTCGGTAGC  
9\_5 CTTCCGAGAAGTTTTTTTTTTTGTCAATTTGATTTTTTTTTTTGCGTCACGGTTTTTTTTTTTTAGTGGCCAAGC  
9\_6 GTCTCAGGCGCTTTTTTTTTTTCTTGAGAATGTTTTTTTTTTGATAGAGTCCTTTTTTTTTTATGTTTAGTT  
9\_1 TCGAACACTTCTTTTTTTTTTTCTTTTTTTTTTTTTTTTTTTTTTTTTTTTTTTTTTTTTTTTTTTGGTCCGTAGG  
10\_1 TTTTTTTTTTTTTTTTTTTTTTTTACATAGGCCGTTTTTTTTTTTGAAGGGTCCCTTTTTTTTTTTTTTTTTTTTT  
10\_2 CCCACCTAGATTTTTTTTTTTAGAAGAAAGGGTTTTTTTTTTCAATATCAGGCTTTTTTTTTTTGGTCGTTAG  
10\_3 TAGAACTGAGTTTTTTTTTTTAGACAGGGCTATTTTTTTTTTTAGTCGGTACCCTTTTTTTTTTTGGAGTGATTG  
10\_4 TATAGCGCGTTTTTTTTTTTCTGTGGCGGATTTTTTTTTTTCTTCTCGGAAGTTTTTTTTTTCCGTAAAGGG  
10\_5 CTGGCGGTACTTTTTTTTTTTTATAAACTCGCTTTTTTTTTTTGCGCCTGAGACTTTTTTTTTTTTTCCAAATGA  
10\_6 ATTTCCCTGATTTTTTTTTTTCCCTGAGGGAGTTTTTTTTTTGAAGTGTTGATTTTTTTTTTTTCATTCTCAA  
11\_3 TCTAGGTGGGTTTTTTTTTTTCGGCCTATGTG  
11\_4 CTCAGTTCTATTTTTTTTTTTCCCTTTCTTCT  
11\_5 ACGCGCTATATTTTTTTTTTTTAGCCCTGTCT  
11\_6 GTACCGCCAGTTTTTTTTTTTCGCGCCACAG  
11\_1 TCAGGGAATTTTTTTTTTTGCGAGTTTATG  
11\_2 TTTTTTTTTTTTTTTTTTTTTTTCTCCCTCAAGG

Motif 13 (3 hexagon × 7 hexagon)

| Name | Sequence                                                          |
|------|-------------------------------------------------------------------|
| 1-2  | GATCCGACCTGTGGTCGTCAC                                             |
| 1-3  | CAGTACACGCAGATGTTGCTT                                             |
| 1-4  | CGTACACCTGAAGTTCAGTTC                                             |
| 1-5  | GAGGCAGTAGAGTACCACACC                                             |
| 1-6  | TACTTGCCTTGTGGGATCCTG                                             |
| 1-7  | TATGCGTCTGGACATCTAACT                                             |
| 1-8  |                                                                   |
| 2-1  | GTGACGACCACAGGTCGGATCTCGCGAGATCATACGTCTGACCATAGGACTCTGCCACGTGCA   |
| 2-2  | AGGCTATGAAACCCATAAGGGGTACAGCGTATGATCTCGCGAAAGCAACATCTGCGTGTACTG   |
| 2-3  | GAAGTGAAGTTCAGGTGTACGTTACGTCAGATGCTTCTTAAGGCACAATACCATGTGTTTCAGA  |
| 2-4  | CCCTCTAACCGAGTGTATAGCTTAAGAAGCATCTGACGTAAGGTGTGGTACTCTACTGCCTC    |
| 2-5  | CAGGATCCCACAAGGCAAGTATTCGCAATCAAGTCTCAAGGAACGGGAAGCCTGACGAGAAT    |
| 2-6  | CCAGCTGCAATTTCCGCACGACCTTGAGAAGTTGATTGCGAAAAGTTAGATGTCCAGACGCATA  |
| 2-7  |                                                                   |
| 3-1  | TATTGGGTCTAGAAGACTCAC                                             |
| 3-2  | TCGAGCTTGCCAGATCAAGATGTGAGTCTTCTAGACCCAATATGCACGTGGCAGAGTCCATG    |
| 3-3  | CCCTTATGGGTTTCATAGCCTGGGCGTCTCGAAGTGGCTGCACAGGAAATCCTGAACCCAAGG   |
| 3-4  | CCGAAAGTTTCAAGTCGGGATTGCAGCCACTTCGAGACGCCCTCTGAACACATGGTATTGTGC   |
| 3-5  | CTATAACACTCGGTTAGAGGGCTTTGAGTACGCTAGCAGCTTTGACTAGCAAAGTGGTCTACG   |
| 3-6  | ACTGCAAAGAGACGACGAGTAAAGCTGCTAGCGTACTCAAAGATTCTCGTCAGGCTTCCCCTT   |
| 3-7  | TCGTGCGGAAATTGCAGCTGGCAGCTCGCCTTGAACAGTGAAGGTTACCTCATTTGGGCTTGTG  |
| 3-8  | TTCCTGTTCAAGGCGAGCTG                                              |
| 4-1  | ATCTTGATCTGGCAAGCTCGACAATCCATTGGCTTATTGAGTTCCGGGATGATTTGACAACCTC  |
| 4-2  | TGTCGTGAAGTCAATCTCGTTACTCAATAAGCCAATGGATTGCCTTGGGTTTCAGGATTTCCCTG |
| 4-3  | ATCCCGACTTGAAACTTTTCGGTGGATGTTTCATCGCACAACTGATACGGCCTGAGTCCATCCCA |
| 4-4  | ATCTGGAAGCAGTGCACCAATCAGTTGTGCGATGAACATCCACGTAGACCACCTTTGCTAGTCA  |
| 4-5  | TACTCGTCTGCTCTTTGAGTTCGCGCTATACAGAAGATGAGCATAACCTATTGCGTGATCGTC   |
| 4-6  | AATAGCCCGACAGTTATCATACTCATCTTCTGTATAGCCGCACACAAGCCCAATGAGGTAACC   |
| 4-7  |                                                                   |
| 5-1  | GGCGCAAGGTGTTAGCATCCC                                             |
| 5-2  | TCCGAACAACAACCCACACGGGGATGCTAACACCTTTCGCGCCGAGTTGTCAAATCATCCCAGG  |
| 5-3  | AACGAGATTGACTTCACGACAGTTAATCCGGAAGCGATGGTCTGGCTATCCTCGAGAACATGC   |
| 5-4  | CTGGAAATACTGCTCAGCTCCGACCATCGCTTCCGGATTAAGTGGGATGGACTCAGGCCGTAT   |
| 5-5  | ATTGGTGCAGTCTTCCAGATAACAATCAGTGGGTGGTAATCCAAGTCTTGAGGAAACGGAAAC   |
| 5-6  | ATGAACTAGTGAACCTCCAAGGGATTACCACCCACTGATTGTGACGATCACGCAATAGGTATG   |
| 5-7  | TATGATAACTGTGCGGCTATTAAGTACACGGACTACGTTACGAACGCTCCCCTGTCCATTTAGG  |
| 5-8  | CGTAACGTAGTCCGTGTAGTT                                             |
| 6-1  | CCGTGTGGGTTGTTGTTTCGGAGATATGCCTATCTGGTCCATGTTCGCAACGCAACCTGGGACAT |
| 6-2  | TGCTCGAAATAGGCTGCGTTCCATGGACCAGATAGGCATATCGCATGTTCTCGAGGATAGCCA   |

6-3 GGAGCTGAGCAGTATTTCCAGTATGCTTATAGACGTTTGTGCACTTTCAACAGTTCTGTCTA  
6-4 CCGACACCATCTGGGAACTAACAAACAAACGTCTATAAGCATAGTTTCCGTTTCCCTCAAGACTT  
6-5 CTTGGGAGTTCACTAGTTCATGTGTATACCTGCAAGATCTATTCAGCTACTTTGTGCTCCCGA  
6-6 GCTAGCCAAGGTAAAGCACATATAGATCTTGCAGGTATACACCCATAAATGGACAGGGAGCGTT  
6-7  
7-1 TCATGGGACCTCGTGATATGA  
7-2 GAAGAGGCACTGGTTAACTCGTCATATCACGAGGTCCCATGAATGTCCCAGGTTGCGTTGCGA  
7-3 GAACGCAGCCTATTTTCGAGCAACGCACTTACAACGTGTAAGGCGTAACAACGATGTGAATGCC  
7-4 AGCTTCACACACCCTGTGTGCGCTTACACGTTGTAAGTGCGTTAGACAGAACTGTTGAAAGTG  
7-5 TTAGTTCCCAGATGGTGTGCGGCTCACCTATATCGGATTGAACGGTAAACGGCCACAGACTCG  
7-6 TTGCCTGATGCTCCAGTCAACGTTCAATCCGATATAGGTGAGTCGGGAGCACAAAGTAGCTGA  
7-7 ATGTGCTTTACCTTGGCTAGCTTCTACTCCGACGTTGGTGGCATCTCGGTACTGAATGGAGGT  
7-8 GCCACCAACGTCGGAGTAGAA  
8-1 CGAGTTAACCAGTGCCTCTTCTTCCATGACGCTTAGATCGTTCTCCGTTAGACAACCATGGAG  
8-2 TTTCCCATAGCGCTGGCTCATAACGATCTAAGCGTCATGGAAGGCATTCACATCGTTGTTACG  
8-3 CGACACAGGGTGTGTGAAGCTGAAGCGTGTCTGAGTAGGGAGTCCCAACGAATGAAGGCAGGT  
8-4 CACCTTATCCTGCTTGTTAGGCTCCCTACTCAGACACGCTTCCGAGTCTGTGGCCGTTTACCA  
8-5 GTTGACTGGAGCATCAGGCAATTAGTGACTCGATGGGATAGAGTTCTAAGAGCACTATGGCTA  
8-6 AGACCAATGCCTTTCTAGTGTCTATCCCATCGAGTCACTAAACCTCCATTCAGTACCGAGAT  
8-7  
9-1 GGACCTTTATGGAGACACTTG  
9-2 CTTTGTACACGCTCTACGGCTACAAGTGTCTCCATAAAAGGTCCCTCCATGGTTGTCTAACGGAG  
9-3 ATGAGCCAGCGCTATGGGAAAATTGCTGCTCTATGTCATGCCGTACGCAAGCACTTCTTGCCG  
9-4 GAATCTACTTACTGCGAATGTGGCATGACATAGAGCAGCAATACCTGCCCTTCATTCGTTGGGA  
9-5 CCTAACAAAGCAGGATAAGGTGCTCAACGACTAGGGCTTCGGTTCACAGCCAAACACAACGGCA  
9-6 CTCAACATGGGTACACTCTCAACCGAAGCCCTAGTCGTTGAGTAGCCATAGTGCTCTTAGAAC  
9-7 ACACTAGAAAGGCATTGGTCTATGTGAGCAAGGAGATTCGTCCTACAACCTTAGCAATCGCCT  
9-8 ACGAAATCTCCTTGCTCACAT  
10-1 TAGCCGTAGAGCGTGACAAAGAGAACCGTTCAGCGAACATAGCATGAGATTCGTCATTCCTAC  
10-2 GAGTGGTAGGATCTGATGTACCTATGTTTCGCTGAACGGTTCTCGGCAAGAAGTGCTTGCGTAC  
10-3 ACATTCGCAGTAAGTAGATTTCGGGTACGTGTGCATGTGCACGCTACAGACGAGCGATCCAATC  
10-4 CCAGCTATTCCCGGGTTGCTACGTGCACATGCACACGTACCCCTGCCGTTGTGTTTGGCTGTGA  
10-5 TGAGAGTGTACCCATGTTGAGTAGGAGTTATTGTAGCCTACGTCCACTCCTTCAGTCCCTCAT  
10-6 CAAAGGTATCAACGTTCTGCGCGTAGGCTACAATAACTCCTAAGGCGATTGCTAAGGTTGTAG  
10-7  
11-1  
11-2 GTAGGAATGACGAATCTCATG  
11-3 GTACATCAGATCCTACCACTC  
11-4 GATTGGATCGCTCGTCTGTAG  
11-5 TAGCAACCCGGGAATAGCTGG  
11-6 ATGAGGGACTGAAGGAGTGGA  
11-7 CGCAGAACGTTGATACCTTTG

Motif 14 (4 hexagon × 6 hexagon)

| Name | Sequence                                                        |
|------|-----------------------------------------------------------------|
| 1-1  |                                                                 |
| 1-2  | CTCCATATTGATGACCCAACTCTACGGCTT                                  |
| 1-3  | GTCCAAATGGTCCTGAACCCAGCGACTTCG                                  |
| 1-4  | GTTGATAGTCTGCAACTTGGCGTTGCTTGG                                  |
| 1-5  | TGCTGCATTAGAAGCACATAACAGTGGGCT                                  |
| 2-1  | TCGCTAGTCCCATCACTCGCTTTTTTTTTTTTTTTTTTTTTTTTTTTTTTTTTAAGCCGTAGA |
| 2-2  | GACATTTCCCGGTAAAGCAGGATTGAACAGCAATATGGAGTTTTTTTTTTTCGAAGTCGCT   |
| 2-3  | ATCACGCACCTTGAGGCGAGGATGGCGATTCCATTTGGACTTTTTTTTTTCCAAGCAACG    |
| 2-4  | GTGGTCGACTCGAAGAGGCACAACCTGGCCAGACTATCAACTTTTTTTTTTTAGCCCACTGT  |
| 2-5  | TTGTCTAGCATAATGCAGCA                                            |
| 3-1  |                                                                 |
| 3-2  | CTAAGCGATACGACAACACCTAGTGTACGCGGACTAGCGAGTTGGGTCATCTGTTCAATC    |
| 3-3  | AAGTCTTCCTAAGTGTCTTGGGATGTGGCTGGGAAATGTCGGGTTTCAGGAAATCGCCATC   |
| 3-4  | TACGCGCACTCTCGTCTGACTGGGAATGCTGGTGCCTGATCCAAGTTGCATGGCCAGTTG    |
| 3-5  | GGACTGTCACTGCACACTGAGATTTCTAGAGAGTCGACCACTATGTGCTTCTGCTAGACAA   |
| 4-1  | GAGGTGACGACGAATGTAGCTTTTTTTTTTTTTTTTTTTTTTTCGAGTGATGGCGTACACTA  |
| 4-2  | GTTTACGTTTACTAGATGCGAACCGCCAGATATCGCTTAGCTGCTTTACCAGCCACATCC    |
| 4-3  | GCAGTCTACAAGTACATGACGGTCTCACGAAGGAAGACTTCTCGCCTCAAAGCATTCCCA    |
| 4-4  | TGTCCGCATGAACTCAACAGCCAATCAAAGAGTGC CGGTATGCCTCTTCGCTCTAGAATC   |
| 4-5  | AAGGTAGGGTGTGACAGTCC                                            |
| 5-1  |                                                                 |
| 5-2  | TACGTTCCCTCACTATGGTAGTGGAGCAATTCGTCACCTCGGTGTTGTCGCTCTGGCGGTT   |
| 5-3  | CTATGCACTGGTTGGCAGCTATCCGGAGTCAAACGTGAACCAAGACACTTTCGTGAGACC    |
| 5-4  | TCCAGTACTAACATCAGGGTAAGAGAGAACTGTAGACTGCGTCAGACGAGCTTTGATTGG    |
| 5-5  | GGATCCAGGAGTACGTGGATAACCGGGTCACATGCGGACATCAGTGTGCAACCCTACCTT    |
| 6-1  | CACGAGGTCAAGTGAAGGAATTTTTTTTTTTTTTTTTTTTGTACATTCGATTGCTCCAC     |
| 6-2  | TACCGCAATTAGGGAGTTTGTAGTCGTGGTTAAGGGAACGTACGCATCTAGTGACTCCGGAT  |
| 6-3  | ATCCATTCTCCTTGTGTGGACGATCAGTATCAGTGCATAGGTCATGTACTGTTCTCTCTT    |
| 6-4  | GTTGGAAACTGAAAGATGAGGTTAGGTTCTTAGTACTGGACTGTTGAGTTTGACCGCGTT    |
| 6-5  | GCTATGTATCTCCTGGATCC                                            |
| 7-1  |                                                                 |
| 7-2  | CTACAGTAGCTAGGCATTGCATGGAACACTGACCTCGTGTACCATAGTGTAACCACGAC     |
| 7-3  | ACGGTTATAGTAGGTAACGTCAAACCCGCTAATTGCGGTAAGCTGCCAACATACTGATCG    |
| 7-4  | AACGGTGAGCATGTCAGTCGGCATAAGTCCGAGAATGGATAACCCTGATGTAGAACCCTAAC  |
| 7-5  | TCCGAAACGACCTATAGCGCCCTGTGAATGAGTTTCCAACATCCACGTACGATACATAGC    |
| 8-1  | AGCGTCAGGTACCCACAGAATTTTTTTTTTTTTTTTTTTTTTCCCTTCACTGTAGTTCAT    |
| 8-2  | AGTGGCACGTGTTCTGTTTAAACGATAGAGGCTACTGTAGTAACTCCCTAGCGGGTTTG     |
| 8-3  | CCATAAAGTCACGGAGATAATGACACCATCTATAACCGTTCCACACAAGGGACTTATGC     |
| 8-4  | TCGACAGACAGGTTTATCGAATCCCGCACAGCTCACCGTTCTCATCTTCCATTCACAGG     |

8-5 GCTCTCATACTCGTTTTCGGA  
9-1  
9-2 AGCAGCGTGTCCCTATTAGCCAGCCTTCGTGACCTGACGCTGCAATGCCTACTCTATCGTT  
9-3 CAAGGGATCAAGAGCGAGCTTTCGAACGAAACGTGCCACTACGTTACCTAGATGGTGTCA  
9-4 ATCACATGGTTTTCTCGCAAACACTCCAAGGGACTTTATGGCGACTGACATTGTGCGGGAT  
9-5 CCTACGTCGATTCCGCGAATATCAGCCGAGTGTCTGTFCGAGCGCTATAGGGTATGAGAGC  
10-1 ACGCAGATATTTTTTTTTTTTTTTTTTTTTTTTTTTTTTTTTTTTTTTTTCTGTGGGTCACGAAGGCT  
10-2 GACTACTTTGTTTTTTTTTTCTACCCGTTTACACGCTGCTAAACAGGAAC TTCGTTTCGAA  
10-3 GGTACAGAGTTTTTTTTTTTTCAATGAAGCTTGATCCCTTGTTATCTCCGTCCTTGGAGTG  
10-4 GGTGAAATACTTTTTTTTTTTTACGCTTGCCACCATGTGATTCGATAAACCCCTCGGCTGAT  
10-5 CGTACCGACATCGACGTAGG  
11-1  
11-2 ATATCTGCGTGGCTAATAGGAAACGGGTAG  
11-3 CAAAGTAGTCAGCTCGCTCTAGCTTCATTG  
11-4 ACTCTGTACCTTTGCGGAGAAGGCAAGCGTA  
11-5 GTATTTACCATTCGCGGAATGTCGGTACG

Motif 0 (24H×28T)

| Name | Sequence                                     |
|------|----------------------------------------------|
| 1-1  | CAGGGTGGTACTATTTATCGT                        |
| 1-2  | CCTCCGGGCACTCAGCTTACT                        |
| 1-3  | CAACCGATCTCTGGATAATAT                        |
| 1-4  | CCCGTCAAAGCTTATATTTCT                        |
| 1-5  | CTATTTAGAACTCCAGGAAGT                        |
| 1-6  | CCAGGCCACCTATATGGATT                         |
| 1-7  | CTTAAAGGCTCTGGTTGAAGT                        |
| 1-8  | CAGATCACGACTAACACACCT                        |
| 1-9  | CGCCTCTATCCTGTGAACACT                        |
| 1-10 | CGGCTGAGAACTTAAGTTTCT                        |
| 1-11 | CGGTCTCGCCCTTAGAATGAT                        |
| 1-12 | CGGGCGCCAACCTGAAGCCCTT                       |
| 1-13 | CGGGACATCCCTTTAGTCGAT                        |
| 1-14 | CGGAGATGCGCTCAGATGTAT                        |
| 2-1  | TTTTTTTTTTTTGGGTGCCCATGTACCACCCTGTTTTTTTTTTT |
| 2-2  | CGGGCTGGTCTCCGAAGGACTGTGCCCGGAGGACGATAAATA   |
| 2-3  | CGAAGTTTCCCTGCATTATGATGAGATCGGTTGAGTAAGCTGA  |
| 2-4  | CTTCAAGTGCTCCCTGCAGCTGCTTTGACGGGATATTATCCA   |
| 2-5  | CGATTTTCAGCTAAAGTTGTGTGTTCTAAATAGAGAAAATATAA |
| 2-6  | CCAATGCGCCTGCACCTGTATGGTGGGCTGGACTTCCTGGA    |
| 2-7  | CATCACATCCTCGTTCGTA CTGAGCCTTTAAGAATCCATATA  |
| 2-8  | CACAGTCTGCTACTGCAGATTGTCGTGATCTGACTTCAACCA   |
| 2-9  | CTTGGATACCTCAGTCTGACTGGATAGAGGCGAGGTGTGTTA   |
| 2-10 | CAACTCTAGCTCCTCCGCACTGTTCTCAGCCGAGTGTTCACA   |
| 2-11 | CTCACATAA ACTTCCCTCTTCTGGGCGAGACCGAGAAACTTAA |
| 2-12 | CTTGCGAGGCTAAAGAATGCTGTTGGCGCCCGATCATTCTAA   |
| 2-13 | CAGCGGACTCTAGTGGGCTATGGGATGTCCCGAAGGGCTTCA   |
| 2-14 | CATCGTGTGCTTATTCCCTCTTGC GCATCTCCGATCGACTAAA |
| 2-15 | CCTATTTGTCTTTTTTTTTTTTTTTTTTTTTTTTATACATCTGA |
| 3-1  | CGCCGCGTGTCTATCGTGGTTGACCAGCCGATGGGCACCCA    |
| 3-2  | CCATTAGGGCCTAAGCAGCCTGGAAACTTCGAGTCCCTTCGGA  |
| 3-3  | CATATATCGACTCGTCAAGGTGCACTTGAAGATCATAATGCA   |
| 3-4  | CGAAAGTTGGCTAAACGACATGCTGAAATCGAGCTGCAGGGA   |
| 3-5  | CATACGGTTTCTAGAAAAGATTGGCGCATTGGACACA ACTTTA |
| 3-6  | CAAGGCTCGGCTTATGCAATTGGATGTGATGATACAGGTGCA   |
| 3-7  | CAACTTAGCTCTGAAAGTCGTGCAGACTGTGAGTACGAACGA   |
| 3-8  | CACTTCCCATCTAAACCAGGTGGTATCCAAGAATCTGCAGTA   |
| 3-9  | CAAGTCCGCGCTCGTTCAGATTGCTAGAGTTGAGTACAGACTGA |
| 3-10 | CGTGTAGAATCTAGAGCTGATGTTATGTGAGAGTGCGGAGGA   |

3-11 CAGCTGAGAGCTTTGGTTCGGTGCCTCGCAAGAGAAGAGGGAA  
3-12 CATCTTAGGGCTGCTGTGTATGAGTCCGCTGAGCATTCCTTA  
3-13 CCTTTCTCGACTCTGAAGTGTGCACACGATGATAGCCCACTA  
3-14 CGCCCTGTTTCTGAGTCCCTTGACAAATAGGAAGAGGAATAA  
4-1 TTTTTTTTTTTGGGAGTGGATGACACGCGCGTTTTTTTTTTT  
4-2 CAGGCTCTACTGGGAGGATATGGCCCTAATGGAACCACGATA  
4-3 CGCGCTAGACTACATTTATATGTTCGATATATGAGGCTGCTTA  
4-4 CTACGCTATCTTTACCATTATGCCAACTTTCGACCTTGACGA  
4-5 CGGAGTAAACTTGTGCCTTGTGAAACCGTATGATGTCGTTTA  
4-6 CAGATAAAGCTACTAGCATTTGCCGAGCCTTGAATCTTTCTA  
4-7 CGCCTCCTTCTCAATAATAATGAGCTAAGTTGAATTGCATAA  
4-8 CCAACTAGGCTGGACCATCGTGATGGGAAGTGACGACTTTCA  
4-9 CTAATGATGCTAATGAACTATGCGCGGACTTGACCTGGTTTA  
4-10 CCGCCAGTACTAAATACCTGTGATTCTACACGAATCTGACGA  
4-11 CGTGGCGTTCTACCATTGTTTGTCTCAGCTGATCAGCTCTA  
4-12 CACTTTATTCTATGAGTTAATGCCCTAAGATGACCGACCAAAA  
4-13 CCCGACCGTCTGCCCTCGCTTGTTCGAGAAAGGATACACAGCA  
4-14 CGGATTTGACTCACAGAGACTGAAAACAGGGCGACACTTCAGA  
4-15 CATGCTCGCCTTTTTTTTTTTTTTTTTTTTTTTAAGGGACTCA  
5-1 CGGACTTCATCTATGGTTTATGTAGAGCCTGATCCACTCCCA  
5-2 CCGTTGATGACTGGGCGGATTGTCTAGCGGATATCCTCCCA  
5-3 CTAATGGGACCTCTGGTCCCTGATAGCGTAGATATAAATGTA  
5-4 CCACTTCCTTCTTGGTTGCGTGTACTCCGATAATGGTAAA  
5-5 CAGTACATAGCTAGGATGCATGCTTTATCTGACAAGGCACAA  
5-6 CGAAGGGAGCCTGGCATTGTGAAGGAGGCGAAATGCTAGTA  
5-7 CGCCAAGTAGCTAGTCCGCATGCCTAGTTGGATTATTATTGA  
5-8 CTAGCAGCATCTAATCCATTTGCATCATTAGACGATGGTCCA  
5-9 CAAGCGCGTACTTACCTGACTGTACTGGCGGATAGTTCATTA  
5-10 CCCTGCGCACCTTCGCCACGTGAACGCCACGACAGGTATTTA  
5-11 CCCTAACCTCTTTAGGTAAGTAAAGTGAACAATGGTA  
5-12 CTGCAAACATCTTACTGACCTGACGGTCGGGATTAATCATA  
5-13 CATGGTACGGCTAACATATCTGTCAAATCCGAAGCGAGGGCA  
5-14 CATGCGGCTGCTACCGGGCATGGCGAGCATGAGTCTCTGTGA  
6-1 TTTTTTTTTTTGGAGGATTCTGATGAAGTCCGTTTTTTTTTTT  
6-2 CCCGTGGTCCTCGCCGAAATGTCATCAACGGATAAACCCATA  
6-3 CTTTATTGGCTTCTCAGTTATGGTCCCATTAGAATCCGCCCA  
6-4 CACTAGAAGCTTAAGGGTAATGAAGGAAGTGGAGGGACCAGA  
6-5 CGCGAGAGCCTTCCTGTTATTGCTATGTACTGACGCAACCAA  
6-6 CGCGTCTTCTACGGCGAGATGGCTCCCTTCGATGCATCCTA  
6-7 CCAGTTAGTCTCAATGCAGTTGCTACTTGGCGACAAATGCCA  
6-8 CCAATACTCCTCGGAGGCAGTGATGCTGCTAGATGCGGACTA  
6-9 CCAATCGGCCTGCAGGCTGTTGTACGCGCTTGAATGGATTA

6-10 CCCTATATTCTCTTGGGCAATGGTGCGCAGGGAGTCAGGTAA  
6-11 CGGTGGCCGCTACAACCAATTGAGGGTTAGGGACGTGGCGAA  
6-12 CTGTTGCTTCTTTAGTTCTTTGATGTTTGCAGAGTACCTAAA  
6-13 CAGCGTTGGCTGAAACTCGCTGCCGTACCATGAGGTCAGTAA  
6-14 CGTGGTCAGCTTGCTCTAGTTGCAGCCGCATGAGATATGTTA  
6-15 CCCTGACGCCTTTTTTTTTTTTTTTTTTTTTTTTATGCCCGGTA  
7-1 CGATTGGTCTCTGAGACTTATGGACCACGGGAGAATCCTCCA  
7-2 CGGGCCGGCTCTATTGACAATGCCAATAAAGATTTGCGGGCGA  
7-3 CAGAGGATGGCTTTCCGATGTGCTTCTAGTGATAACTGAGAA  
7-4 CACCAAAGGGCTCAACAACCTGGCTCTCGCGATTACCCTTAA  
7-5 CTTGTTTCAGACTCGAATTCCTGAAGGACGCGAATAACAGGAA  
7-6 CAGAGCATCCCTACAGATGCTGACTAACTGGATCTCGCCGTA  
7-7 CGTACTGGTTCTGACAGGTCTGGAGTATTGGAAGTGCATTGA  
7-8 CCTCGGACGCCTAACTTCTGTGGCCGATTGGACTGCCTCCGA  
7-9 CCACCAAACCTCTATAGCCCGTGAATATAGGGAACAGCCTGCA  
7-10 CATGAGTGAAGTGTAGGTCTGCGGCCACCGATTGCCCAAGA  
7-11 CTAGAGTACACTACCCGCATTGAAGCAACAGAATTGGTTGTA  
7-12 CGAGAAGTATCTATGCACCCTGCCAACGCTGAAAGAACTAAA  
7-13 CTATTGAGGACTATCCAATCTGCTGACCACGAGCGAGTTTCA  
7-14 CCGACTGCTGCTGCGAATAGTGGCGTCAGGGAAGTACAGCAA  
8-1 TTTTTTTTTTTTTGCTTGGGTTGAGACCAATCGTTTTTTTTTTT  
8-2 CCGCACAGCCTCATACCCTCTGAGCCGGCCCGATAAGTCTCA  
8-3 CTAGGTTCCCTTCCCTTATAATGCCATCCTCTGATTGTCAATA  
8-4 CTATGGCTACTCACAACCGTTGCCCTTTGGTGACATCGGAAA  
8-5 CGTGTGTGCTTATATCACGCTGTCTGAACAAGAAGTTGTTGA  
8-6 CGAGCGTCTCTTGTGCTTTGGGATGCTCTGAGGAATTCGA  
8-7 CTGACGCTCCTCTGGACCTATGAACCAGTACGAGCATCTGTA  
8-8 CACATTTAACTAACTTATCCTGGCGTCCGAGGAGACCTGTCA  
8-9 CAACATACGCTTCGAGCCAGTGAGTTTGGTGGACAGAAGTTA  
8-10 CAATACTTCCCTACACCTATCTGTTCACTCATGACGGGCTATA  
8-11 CTTCCAGCCCTTAAAGCGGATGTGTACTCTAGAGACCTAACA  
8-12 CCCTATCCACTTAGTTTCGACTGATACTTCTCGAATGCGGGTA  
8-13 CTCCAAGCCCTCACGAAACATGTCCTCAATAGAGGGTGCATA  
8-14 CCTACGGATCTGATGCACATTGCAGCAGTCGGAGATTGGATA  
8-15 CCAGCAACGCTTTTTTTTTTTTTTTTTTTTTTTTACTATTCGCA  
9-1 CCTTACCGGACTTTCCGTAATGGCTGTGCGGAACCCAAGCAA  
9-2 CTTACCGCGGCTAGTGCTCATGGGAACCTAGAGAGGGTATGA  
9-3 CTTGATCGAACTTGTGCATATTGTAGCCATAGATTATAAGGAA  
9-4 CTGGTTTGTACTCGTACCAATGGACAACACGAAACGGTTGTGA  
9-5 CCCGTGTTGACTGCATAGTATGAGACGCTCGAGCGTGATATA  
9-6 CCGCTAGATCCTCCTTGTGCTGGAGCGTCAGAAAAGACAACAA  
9-7 CGCAGGCTAGCTTACGTTAGTGTTAAATGTGATAGGTCCAGA

9-8 CTCCGGTCAACTAGTTAGTATGCGTATGTTGAGGATAAGTTA  
9-9 CGGTCTTTAACTGGGATTACTGGAAGTATTGACTGGCTCGAA  
9-10 CAGTTCGTCACTGGCTACCTTGGGCTGGAAGAGATAGGTGTA  
9-11 CATACTGTCTCTAACTGCAATGTGGATAGGGATCCGCTTTAA  
9-12 CTTGGCTTTACTTATCGGCGTGGGCTTGGAGAGTCGAACTAA  
9-13 CGTAAGGGCACTATCGTTTATGATCCGTAGGATGTTTCGTGA  
9-14 CTCGCTTTAGCTGGAGACCGTGCGTTGCTGGAATGTGCATCA  
10-1 TTTTTTTTTTTAGTGCAGAATGTCCGGTAAGGTTTTTTTTTTT  
10-2 CATACTCTCTTAGGTCAATTGCCGCGGTAAGATTACGGAAA  
10-3 CACACCACACTCAGTAGGTTTGTTCGATCAAGATGAGCACTA  
10-4 CCACGCAGTCTGGTCATCACTGATCAAACCAGAATATGACAA  
10-5 CAACGCAAGCTTTCTGATTATGTCAACACGGGATTGGTACGA  
10-6 CGTAGTGGCCTTACTAGGGTTGGATCTAGCGGATACTATGCA  
10-7 CTCGTGGAACCTCAGGGCTCGTGCTAGCCTGCGAGCACAAAGGA  
10-8 CACCGCCCTCTTACGCCCACTGTTGACCGGAGACTAACGTAA  
10-9 CGAATTAAACTAGACGAGTATGTTAAAAGACCGATACTAACTA  
10-10 CATAAGCGACTTTGATCGGCTGTGACGAACTGAGTAATCCCA  
10-11 CATGCAACCCTGTAAGCAAATGAGACAGTATGAAGGTAGCCA  
10-12 CACTACTGGCTTGTAAGCGCTGTAAAGCCAAGATTGCAGTTA  
10-13 CTGTAAGGTCTCGAGATGTGTGTGCCCTTACGACGCCGATAA  
10-14 CCGTCTAACCTATAATATTGTGCTAAAGCGAGATAAACGATA  
10-15 CGGCAACGTCTTTTTTTTTTTTTTTTTTTTTTTTACGGTCTCCA  
11-1 CCTTTGCTTCCTTGACCAAGTGAGAGGTATGATTCTGCACTA  
11-2 CGTGGAGGCGCTCACCCCTCCTGTGTGGTGTGAATTGACCTAA  
11-3 CTCGCCAACCCTTGTCAGGTGACTGCGTGGAAACCTACTGA  
11-4 CGCTTCTTCACTGCATGCGATGCTTGCCTTGAGTGATGACCA  
11-5 CAGATATAGCCTAGCCCTCGTGGCCACTACGATAATCAGAAA  
11-6 CATCCGCAGCCTTACACTAATGTTCCACGAGAACCCTAGTAA  
11-7 CGATGCAGATCTTCTGCCTTTGAGGGCGGTGACGAGCCCTGA  
11-8 CAATAGCCATCTCACTTGATTGTTTAATTCGAGTGGGCGTAA  
11-9 CGTCCTTGACTCAACGTCCTGTCGCTTATGATACTCGTCTA  
11-10 CTGCGAAGGCCTACAGGCACTGGGTTGCATGAGCCGATCAAA  
11-11 CTTCTTCGAACTGGACATCTTGCCAGTAGTGATTTGCTTACA  
11-12 CAGTCGTGTCTTATGACTATGACCTTACAGAGCGCTTACAA  
11-13 CATTACATGGCTAATGCTGATGGTTAGACGGACACATCTCGA  
11-14 CCAGCATCCACTGCGGTAAGTACGCTTGCCGACAATATTATA  
12-1 TTTTTTTTTTTCTGTGCATATGGAAGCAAAGGTTTTTTTTTTT  
12-2 CTGGCGACGCTCTGACCGTGTGCGCCTCCACGACTTGGTCAA  
12-3 CTTGGTCTACTGTTTATAGATGGGTTGGCGAGAGGAGGGTGA  
12-4 CGCGCGCCACTCATTAGGAGTGTGAAGAAGCGACCTGGACAA  
12-5 CCAGATTTACTTGTACCCAGTGGCTATATCTGATCGCATGCA  
12-6 CGGCGCGCTCTGCTAGCTGGTGGCTGCGGATGACGAGGGCTA

12-7 CGCGCTCCGCTCACTCGGAATGATCTGCATCGATTAGTGTA  
12-8 CATCGGTACCTTTGGGCGGGTGATGGCTATTGAAAGGCAGAA  
12-9 CAAATTGATCTTATAACTACTGTCCAAGGACGAATCAAGTGA  
12-10 CTTTACGGACTCCGGATTCATGGCCTTCGAGAGGACGTTGA  
12-11 CGCGCCTGACTCTGGCTGTATGTTTGAAGAAGAGTGCCTGTA  
12-12 CTCAAACCTCTCGTCGAGTGTGGACACGACTGAAGATGTCCA  
12-13 CATACTCACTCGAGAATCGTGCCATGTAATGATAGTCATAA  
12-14 CCACGGGTGCTGATCGTCCGTGTGGATGCTGGATCAGCATTA  
12-15 CCACCTCCTCTTTTTTTTTTTTTTTTTTTTTTTTAGTTACCGCA  
13-1 CCCGAAGTACCTCTGCAGGATGCGTCGCCAGATATGCACAGA  
13-2 CGTTACCAGGCTACGATGAGTGTAGACCAAGACACGGTCAGA  
13-3 CTGTCCCCTCTCCTTCAAATGTGGCGCGGATCTATAAAACA  
13-4 CATTATATTGCTCCTGAGGGTGTAATCTGGACTCCTAATGA  
13-5 CGTGCATGCCCTCCCAAACCTTGGAGCGCGCGACTGGGTACAA  
13-6 CATTGCACTGCTCTACCCCTTTGCGGAGCGCGACCAGCTAGCA  
13-7 CTTTATCGACCTGTTTAGGTTGGTACCGATGATTCCGAGTGA  
13-8 CTACCGGCGTCTGGACACCATGATCAATTTGACCCGCCAAA  
13-9 CCGCGGTGTGCTGCATTCGCTGTCCGTGAAGAGTAGTTATAA  
13-10 CCCGAGGTTCTGATCTCCATGTCAGGCGCGATGAATCCGGA  
13-11 CATGAGCGTGCTACCCGTTATGAGGTTTGAGATACAGCCAGA  
13-12 CTCTGGAATACTAAGAATGTTGTGATGTATGACTCGACGA  
13-13 CTATTGCTTGTCTGTCTGTCCTGTGCACCCGTGGACGATTCTCGA  
13-14 CCCTCGCAGACTCCCACAGTGAGGAGGTGGACGGACGATCA  
14-1 TTTTTTTTTTTTGTACTTGTGATGGTACTTCGGGTTTTTTTTTTT  
14-2 CCGATGCGACTTGATATGTCTGCCTGGTAACGATCCTGCAGA  
14-3 CGCTGCCAGCTTCAGGGCCTTGAGTGGGACAGACTCATCGTA  
14-4 CAGAAGGGTCTGTGTAAGTGTGCAATATAATGATTTGAAGGA  
14-5 CGAGCGCCGCTGCGGCTATTTGGGCATGCACGACCCTCAGGA  
14-6 CAGGAGGCTCTCAACCGCTTGCAGTGCAATGAAGTTTGGGA  
14-7 CTGGGACGACTGGCACGTCATGGTTCGATGAAGAAAGGGTAGA  
14-8 CTGCACCAGCTGCGTCGTTGTGACGCCGGTAGAACCTAAACA  
14-9 CAAAGGAAACTAACAGTGTCTGCACACCGCGGATGGTGTCCA  
14-10 CTCTGCTCTCTTTACTGGTGTGGAACCTCGGGAGCGAATGCA  
14-11 CATGTAAGACTACGAATCGCTGCACGCTCATGATGGAGATCA  
14-12 CTTTAGGAACTAATCTTTGTTGTATTCAGAGATAACGGGTA  
14-13 CCCAGCGATCTGTTGCATCGTGCAACGAATAGAACATTCCTTA  
14-14 CACGAACAGCTAACCTTAACTGTCTGCGAGGGACAGGACAGA  
14-15 CTATAGTAACTTTTTTTTTTTTTTTTTTTTTTTTACTGTGCGGA  
15-1 CTGGGCAAGCCTTATTGCGATGTCGCATCGGATCAAGTAACA  
15-2 CGTGCGGTCCCTACGCGCAGTGTGGCAGCGAGACATATCAA  
15-3 CGCGGGCCGCTTTCAATTATGACCCCTTCTGAAGGCCCTGAA  
15-4 CTATCTTGTACTGCACCGGTTGCGGCGCTCGACAGTTACACA

15-5 CCAAACCGTCCTCCTACGTTTGAGCCTCCTGAAATAGCCGCA  
15-6 CATGTCCCAACTGGAGTCTTTGTCGTCCAGAAAGCGGTGGGA  
15-7 CCAGCGCGTTCTGTGTCTTATGCTGGTGCAGATGACGTGCCA  
15-8 CTTGACCGCTCTGGAGATTCTGTTTCCTTTGACAACGACGCA  
15-9 CTGCGGGCCACTCGCGCCATTGAGAGCAGAGAGACTGTTA  
15-10 CTACCTTAGTCTAAAGTAATTGTCTTACATGACACCAGTAAA  
15-11 CTACTTGCTGCTCGTTCCCTCTGTTCCCTAAAGAGCGATTTCGTA  
15-12 CAGTATCTGCCTAATTTGCGTGATCGCTGGGAACAAAGATTA  
15-13 CGCTTTGGCACTAGTAGCGGTGCTGTTTCGTGACGATGCAACA  
15-14 CGGTGTTGCACTTAACAGCTTGTACTATAGAGTTAAGGTTA  
16-1 TTTTTTTTTTTGGCCCATCATGGCTTGCCAGTTTTTTTTTTT  
16-2 CAAGACATACTATTCTGTATTGGGACCGCACGATCGCAATAA  
16-3 CTAGACCACCTCTTTCTTTATGGCGGCCCGGACTGCGCGTA  
16-4 CCCTTGTGGCTAAGGAGGTCTGTACAAGATAGATAATTGAAA  
16-5 CACCGAACCCCTCCGCTCGCTGGACGGTTTGGAACCGGTGCA  
16-6 CCTGAAGTTCTTGATCCCGATGTTGGGACATGAAACGTAGGA  
16-7 CTGAGTGACCTTCCATCCATTGAACGCGCTGAAAAGACTCCA  
16-8 CCCTCAGCACTCACTTCTGGTGAGCGGTCAAGATAAGACACA  
16-9 CTGGTAGGACTCCATCCGTATGTGGCCCGAGAGAATCTCCA  
16-10 CGTGCCCTGCTAAACCGCGTTGACTAAGGTAGAATGGCGCGA  
16-11 CCAACATTACTTCCGCGGGATGCAGCAAGTAGAATTACTTTA  
16-12 CGACAAACACTTGCAATTACGTGGCAGATACTGAGAGGAACGA  
16-13 CGCCCACCGCTAAGTGCGTCTGTGCCAAAGCGACGCAAATTA  
16-14 CGGGACGAGCTCAACGCTTGTGTGCAACACCGACCGCTACTA  
16-15 CATTGTACTCTTTTTTTTTTTTTTTTTTTTTTTAAGCTGTAA  
17-1 CTTTGGGTACCTAGACGGGTGTATGTCTTGATGATGGGCCA  
17-2 CGCATGTCCGCTCCAGAAAGTGGTGGTCTAGAATACAGAATA  
17-3 CTAAGGACGTCTCCAATTCATGCCACAAGGGATAAAGAAAGA  
17-4 CAAATGCATACTTTGTTTAGTGGGTTCGGTGAGACCTCCTTA  
17-5 CACTTAGAGTCTGGGCCCCGGTGAACCTCAGGAGCGAGCGGAA  
17-6 CTCTCATGTACTATGTTTCAAGTGGTCACTCAGATCGGGATCAA  
17-7 CCAGCTGTCACTGCGCCACCTGTGCTGAGGGAATGGATGGAA  
17-8 CATCTGATATCTCGGAACGATGTCCTACCAGACCAGAAAGTGA  
17-9 CTACTATTGCTGCTCGAGGTGCAGGGCACGATACGGATGGA  
17-10 CTGCAGAAACCTGCTCCTCGTGAATGTTGGAACGCGGTTTA  
17-11 CTTGAGGGATCTGTAAATTATGTGTTTGTTCGATCCCGCGGAA  
17-12 CAGGAGTCACCTATGCTCATTGCGGTGGGCGACGTAATGCAA  
17-13 CAAACTACTACTCGCGTAAATGCTCGTCCCGAGACGCACTTA  
17-14 CGAATGGGCTCTAGATGTCATGAGTACAATGACAAGCGTTGA  
18-1 TTTTTTTTTTTTCCAGACTATGGTACCCAAAGTTTTTTTTTTT  
18-2 CGTTTCGCTTCTGCTGGGCCGTGCGGACATGCGAACCCGCTTA  
18-3 CACCCTTACCTTTCTGCCAATGACGTCCTTAGACTTCTCTGGA

18-4 CGCCTCACACTGTCAGAGTTTGTATGCATTTGATGAATTGGA  
18-5 CTAACCTGCCTGACCGATCGTGACTCTAAGTGACTAAACAAA  
18-6 CGACGATACCTAAGGCGTGGTGTACATGAGAGACCGGGCCCA  
18-7 CTTTCGCCTGCTTACCATGTCTGTGACAGCTGGACTGAACATA  
18-8 CTATACGGCCTGGTGGTAATTGATATCAGATGAGGTGGCGCA  
18-9 CACGCACGCCTATGCCTTGGTGGCAATAGTAGATCGTTCCGA  
18-10 CGACATGTGCTAGTGTTCGCTGGTTTCTGCAGACCTCGAGCA  
18-11 CACTACGTTCTCGCACAAAGTGATCCCTCAAGACGAGGAGCA  
18-12 CCACAGCAACTAAGTCCATATGGTGACTCCTGATAATTTACA  
18-13 CTTCTGCGCCTTACTGTCATGTAGTAGTTTGAATGAGCATA  
18-14 CGATCACCGCTCGTAAACTATGAGCCCATTTCGATTTACGCGA  
18-15 CTAACCGCACTTTTTTTTTTTTTTTTTTTTTTTTATGACATCTA  
19-1 CTGAGATGATCTCAAACGAATGAAGCGAACGATAGTCTGGAA  
19-2 CCCTTCCCGCCTTAGGCGGCTGGTAAGGGTGACGGCCAGCA  
19-3 CCTGGCTAGTCTATTGTTAATGTGTGAGGCGATTGGCAGAAA  
19-4 CTACGTGGAGCTATTAGGGATGGCAGGTTAGAAACTCTGACA  
19-5 CTGACATTACCTCACAATCCTGGTATCGTCGACGATCGGTCA  
19-6 CTAGGCGTTTCTTATGTCTTGCAGGCGAAGACCACGCCTTA  
19-7 CTTAAGGTGCCTATATAATTTGGCCGTATAGAGACATGGTAA  
19-8 CAACACTGGACTAGAACAACCTGGCGTGCCTGAATTACCACCA  
19-9 CCCTCGTTTACTTCTTAGGCTGCACATGTCGACCAAGGCATA  
19-10 CGACAGTCGCCTGTGGTTAGTGAACGTAGTGAGCGAACACTA  
19-11 CCGTACATCTCTAAAGCAGATGTTGCTGTGGACTTTGTGCGA  
19-12 CGGACCAGGGCTGGGCTCGATGGCGCAGAAGATATGGACTTA  
19-13 CTCGGAAGCTCTCCTACATATGCGGTGATCGATGACAGTCAA  
19-14 CGCCCCGGAACCTTCGGCCTATGTGCGGTTAGATAGTTTACGA  
20-1 TTTTTTTTTTTTTTACCTTGCTTGATCATCTCAGTTTTTTTTTTT  
20-2 CGCTTAAGTCTTTGGCGCTAATGGCGGGAAGGGATTTCGTTTGA  
20-3 CCCTAGGCCCTAGCTGCATGTGACTAGCCAGGAGCCGCCATA  
20-4 CTAAGCCTTCTGTTAATTCTTGCTCCACGTAGATTAACAATA  
20-5 CGGGCTCCACTGTAAGTGCTTGGTAATGTCAGATCCCTAATA  
20-6 CTCTGTTATCTGGTAGTAGGTGAAACGCCCTAGAGGATTGTGA  
20-7 CCCGTGCGACTACAATTAGATGGCACCTTAAGAAGGACATAA  
20-8 CACCAACGGCTAGGCACGGCTGTCCAGTGTGAAATTTATATA  
20-9 CTGGGCAGTCTACGAACTCTTGTAACGAGGGAGTTGTTCTA  
20-10 CGAGCGATACTCACCCATTGTGGCGACTGTTCGAGCCTAAGAA  
20-11 CGTTATGCCCTTCAAGATTATGAGATGTACGGACTAACCA  
20-12 CTGAAGGTCCCTCCAGAGTGCTGCCCTGGTCCGATCTGCTTTA  
20-13 CGGGCTTTGCTGAGCTGTGTTGAGCTTCCGAGATCGAGCCCA  
20-14 CGGCTACTTCTGATCTTGGGTGTTCCCGGGCGATATGTAGGA  
20-15 CGTCATATCCTTTTTTTTTTTTTTTTTTTTTTTTATAGGCCGAA  
21-1 CTTGCTTTGCCTCCTAACGATGACTTAAGCGAAGCAAGGTAA

21-2 CAATACACCGCTGCAAGACCTGGGCCTAGGGATTAGCGCCAA  
21-3 CTTGGGACGGCTTTGGAAATTGAAGGCTTAGACATGCAGCTA  
21-4 CCAATTAGGACTAATTTAGATGTGGAGCCCGAAGAATTAACA  
21-5 CTTTGGCCATCTTATCCAAATGATAACAGAGAAGCACTTACA  
21-6 CCCTGGTTATCTCCTATCCTTGTCGCACGGGACCTACTACCA  
21-7 CTATTGTCTCTAAGGGTCCTGCCGTTGGTGATCTAATTGTA  
21-8 CTTTGC AATACTACCGGAACTGACTGCCCAGAGCCGTGCCTA  
21-9 CCTACAGCGTCTATGGCAAATGTATCGCTCGAAGAGTTCGTA  
21-10 CGGATCACCTCTCACAGGCCTGGGCATAACGACAATGGGTGA  
21-11 CCTAGCATCTCTCTGGTGTGGACCTTCAGATAATCTTGAA  
21-12 CATAGCGGAACTTTAAACAAGTGCAAAGCCCGAGCACTCTGGA  
21-13 CGACCGCCATCTATCTCAGGTGAAGTAGCCGAACACAGCTCA  
21-14 CTGTGATGGACTACGGAACATGGATATGACGACCCAAGATCA  
22-1 TTTTTTTTTTTTGTGTTTGTGGCAAAGCAAGTTTTTTTTTTT  
22-2 CTCTGACGGCTACATTGAGGTGCGGTGTATTGATCGTTAGGA  
22-3 CGGAAGTGCCTCCATGATTGTGCCGTCCCAAGAGGTCTTGCA  
22-4 CTACCATGGCTGCTCACGAGTGTCCTAATTGGAATTTCCAAA  
22-5 CTTAGTCGGCTGCCGATAGTTGATGGCCAAAAGATCTAAATTA  
22-6 CGCAAGCGCCTGTATCAGGTTGATAACCAGGGATTTGGATAA  
22-7 CTGGTGACGCTTCTAATTCGTGAGGACAATAGAAGGATAGGA  
22-8 CAGGAGAACCTCTTCAACAATGTATTGCAAAGAGGACCCTTA  
22-9 CCCTCTACACTTCGGTGCTATGACGCTGTAGGAGTTCGGTA  
22-10 CGGACTTAACTCGAGCTCCGTGAGGTGATCCGATTTGCCATA  
22-11 CCTGGCGATCTCACAAAGCGTGAGATGCTAGGAGGCCGTGTA  
22-12 CGTGAGTCGCTAAAGGGCGCTGTTCCGCTATGAAACACCAGA  
22-13 CCCTCCCTACTGTATGCCACTGATGGCGGTTCGACTTGTAA  
22-14 CTAGAATTGCTGCCTCTCATTGTCCATCACAGACCTGAGATA  
22-15 CGGCTGGGACTTTTTTTTTTTTTTTTTTTTTTTTATGTTCCGTA  
23-1 CATGCCTGCCCTTGCTAACTTGCCGTCAGAGAACAAACAACA  
23-2 CAAGACTATACTCAGGACGCTGGCACTTCCGACCTCAATGTA  
23-3 CACGCGCATCCTCCGTTTATTGCCATGGTAGACAATCATGGA  
23-4 CGTAAAGCTGCTATGGTCTATGCCGACTAAGACTCGTGAGCA  
23-5 CGTGAATGCACTCGGTAGACTGGCGCTTGCGAACTATCGGCA  
23-6 CTCGGTAATACTTTATGCTATGCCGTCACCAGAACCTGATACA  
23-7 CAAGAGTCTCCTTTAGACAGTGGTTCCTCGACGAATTAGAA  
23-8 CCGGCTGGCCCTGGGCTGCGTGTGTAGAGGGATTGTTGAAGA  
23-9 CCTATGGACTACTACGCACGTTGTTAAGTCCGATAGCACCGAA  
23-10 CAGAGATGAACTTGACTCGTTGATCGCCAGGACGGAGCTCGA  
23-11 CACCCTAGCGCTGGGCACTTTGCGACTCACGACGCTTTGTGA  
23-12 CCTGCCCGTACTATACATAGTGTAGGGAGGGAGCGCCCTTTA  
23-13 CGAAGAGACCCCTTGATTTGGTGCAATTCCTAGAGTGGCATAACA  
23-14 CCTTTGCCGGCTTCTATACTTGTCCAGCCGAATGAGAGGCA

24-1 TTTTTTTTTTTTCAGTATGTATGGGCAGGCATGTTTTTTTTTTT  
24-2 CTGTATCGGCTTTAGTATAATGTATAGTCTTGAAGTTAGCAA  
24-3 CATCTGGGTCTACAAGACCCTGGATGCGCGTGAGCGTCCCTGA  
24-4 CACAGATGTCTATTTGCGAGTGCAGCTTTACGAATAAACGGA  
24-5 CAGCGTGGACTCGTAACAATTGTGCATTCACGATAGACCATA  
24-6 CCGGCTCGCCTCTGGGTAGCTGTATTACCGAGAGTCTACCGA  
24-7 CGCCTAGCTCTAGCAAACCTGTGGAGACTCTTGATAGCATAAA  
24-8 CCCGGCTATCTAGTGCACGTGGGCCAGCCGGACTGFTCTAAA  
24-9 CCAGAATGACTCGACCTCGGTGTGTCCATAGGACGCAGCCCA  
24-10 CAAAGACGACTCTATTCCGTTGTTTCATCTCTGAACGTGCGTA  
24-11 CTGGGCCAACTACGGGCCTCTGCGCTAGGGTGAACGAGTCAA  
24-12 CGTGTGTGACTGTTTCGGACCTGTACGGGCAGGAAAAGTGCCCA  
24-13 CACCGTTTCCTAAGTAGTCATGGGTCTCTTCGACTATGTATA  
24-14 CCCAGGCTTCTGTAAGAGTATGCCGGCAAAGGACCAAATCAA  
24-15 CTTGGAAGACTTTTTTTTTTTTTTTTTTTTTTTTAAAGTATAGAA  
25-1 GCCGATACAGATACATACTGA  
25-2 GACCCAGATGATTATACTAAA  
25-3 GACATCTGTGAGGGTCTTGTA  
25-4 GTCCACGCTGACTCGCAAATA  
25-5 GCGGAGCCGGAATTGTTACGA  
25-6 GAGCTAGGCGAGCTACCCAGA  
25-7 GATAGCCGGGACAGTTTGCTA  
25-8 GTCATTCTGGACGTCGACTA  
25-9 GTCGTCTTTGACCGAGGTCTGA  
25-10 GTTGGCCCAGAACGGAATAGA  
25-11 GTCACACACGAGAGGCCCGTA  
25-12 GGAAACGGTGAGGTCCGAACA  
25-13 GAAGCCTGGGATGACTACTTA  
25-14 GTCTTCCAAGATACTCTTACA

Motif 1 (24H×29T)

| Name | Sequence                                     |
|------|----------------------------------------------|
| 1-1  | GCCGGTGTCATAGGACCAGAG                        |
| 1-2  | GCCTCAACGGCTTTAGCACGT                        |
| 1-3  | AACAGAGAGGTACTCCAAAGA                        |
| 1-4  | ACTTAGTTACCGGCTCGTTGA                        |
| 1-5  | GTGTAAAGCTGGCGGTGACGC                        |
| 1-6  | GGTTACAGATACCTTGACGTG                        |
| 1-7  | GCACGAGTCGAACTTTATTAT                        |
| 1-8  | GGGTTGCCCAGCTCCATAGT                         |
| 1-9  | AAACACGAAGTTAAACGGGCA                        |
| 1-10 | TGCGCGCTTATCGATGCAGCC                        |
| 1-11 | CGTACCCTCACAATAATATT                         |
| 1-12 | CATGTAGACGTTCCCACCATG                        |
| 1-13 | CCCGTATCCTACGGGCAGTTC                        |
| 1-14 | ATCTTATGATCCAGGATTTAT                        |
| 1-15 | TCTTTACAACGTTTTTTTTTTT                       |
| 2-1  | TTTTTTTTTTTTTGCATTGAGCTATGACACCGGCTTTTTTTTTT |
| 2-2  | GAGACGGCGTCGTCGGCGAACAGCCGTTGAGGCCTCTGGTCC   |
| 2-3  | CTGGGCGGATGTTACAGTGCGTACCTCTCTGTTACGTGCTAA   |
| 2-4  | TCCGATTGCTAGACGCATTGTCGGTAACTAAGTTCTTTGGAG   |
| 2-5  | CAACATCTGCAGCAGCTGTAGCCAGCTTTACTACTCAACGAGC  |
| 2-6  | ATCTGCCGCGGTAGTTGCTGCGTATCTGTAACCGCGTCACCG   |
| 2-7  | ATTTATGTGACGTTGAAAGGCTTCGACTCGTGCCACGTCAAG   |
| 2-8  | CATGTATACGAAGTCAGAGGTCTCGGGCAACCCATAATAAAG   |
| 2-9  | TGGAGCTTTGCCGCCCGTCCTAACTTCGTGTTTACTATGGAG   |
| 2-10 | GAATCTGGGATTGAACACCTCGATAAGCGCGCATGCCCGTTT   |
| 2-11 | TAGTCAGGCGTTATTCACAAAGTGAGGGTAGCGGGCTGCATC   |
| 2-12 | CCGAATAAGGTCGCCCCGTAATAACGTCTACATGAATATTATT  |
| 2-13 | ACGAAATGGCGAATTGCCTTTGTAGGATACGGGCATGGTGGG   |
| 2-14 | CAGGATAATGTGTGTCCCTTCAGGATCATAAGATGAACTGCC   |
| 2-15 | TTAATAGGACGCAACGGATCAACGTTGTAAAGAATAAATCCT   |
| 3-1  | CACGGAACGGCATCGAACGTGGACGCCGCTCTCGCTCAATGGC  |
| 3-2  | TCGTCTTAGGCCCTGGACTTCCATCCGCCAGGTCGCCGAC     |
| 3-3  | TTCCGGATCGACCCTCGCCATTAGCAATCGGACGCACTGTAA   |
| 3-4  | TTACCTAGAAATACCCGATGATGCAGATGTTGACAATGCGTC   |
| 3-5  | GAAGCTGGCAAGGTTGCTATACCGCGGCAGATCTACAGCTGC   |
| 3-6  | CGGGAAGATGGAGACAGTCGTGTACATAAATGCAGCAACTA    |
| 3-7  | CTTCTCCAAGAGGGTTAGCGTTTCGTATACATGGCCTTTCAAC  |
| 3-8  | CAGTTTAAACCGGCTTTACTGCGCAAAGCTCCAACCTCTGACT  |
| 3-9  | AACAGCGCCACCGAGACAAGTATCCCAGATTCAGGACGGGCG   |

3-10 AGGCTAACAAAGTCAATAGATAACGCCTGACTAGAGGTGTTCA  
3-11 ATAGCCTGTTTTAGGGTCCCTACCTTATTCGGTTTGTGAATA  
3-12 AACAAATGGCTCTTTAAAGTTGCGCCATTTTCGTATTACGGGCG  
3-13 ACGTTCTCCCGTCCCTCCATTACATTATCCTGAAAGGCAATT  
3-14 AAATCATATGGTGGAGCTGACCGTCCATTAATGAAGGACAC  
3-15 CAAACAAGTATCTTTTTTTTTTTTTTTTTTTTTTTGATCCGTTG  
4-1 TTTTTTTTTTTGGTTTTTCGAGATGCCGTTCGGTGTTTTTTTTTT  
4-2 GATTAGAGCATAATCTCTTTTCGGCTAGGACGACACGTTCTGA  
4-3 GCTGAGGTGTGCCGAGAAACAGTCGATCCGGAAGAAGTCCAG  
4-4 TCTAGGAAACCCGGATATGTGATTTCTAGGTAAATGGCGAGG  
4-5 CGGCAGTTTAAAGACCTGCTCTCTTGCCAGCTTCTCATCGGGT  
4-6 GAACAAATATCTACACCCTATTCCATCTTCCCGTATAGCAAC  
4-7 ACCACCAGGGCTTGAACCTTTCCTCTTGGAGAAGACGACTGTC  
4-8 AGGGTGAGGAACAGTCACATTCGGTTAAACTGACGCTAACC  
4-9 TGCCACCCGTTTCCCTTCATCGGTGGCGCTGTTGCAGTAAAG  
4-10 AGAGCATGCGCCTGAACGTTAACTTGTTAGCCTACTTGTCTC  
4-11 GCAGACGGTAAGGAGGATGTGGAAACAGGCTATTATCTATTG  
4-12 CGCATTATGCCGTTATAACAAGAGCCATTGTTAGGGACCCCT  
4-13 CAAACGTTGAATAGGGCGACTACGGGAGAACGTCAACTTTAA  
4-14 CGAGCACGCCCTCGGTTATGGACCATATGATTTAATGGAGGG  
4-15 GCTATACGGGTTATTTGATGAGATACTTGTTTGGTCAGCTCC  
5-1 GGTCCGGATCACTCCCGCCAACATGCTCTAATCTCTCGAAACC  
5-2 GAACTCGTCTCCGCTCAGGGTCACACCTCAGCGAAAGAGATT  
5-3 CTAATAATAAGCGTGCCTAGCGGTTTCCTAGATGTTTCTCGG  
5-4 TGAGCAAAGCAGACACAAAGGTTAAACTGCCGCACATATCCG  
5-5 ACCATCACCCCTACGATTCTCAGATATTTGTTTCAGAGCAGGTC  
5-6 TAGCAAACCTCAGAGGATTCTTGCCCTGGTGGTATAGGGTGTA  
5-7 ATCTCAAACCAACCCCTCGGGATTCCCTCACCCGTAAAGTTCAA  
5-8 GGTCCCTTGTCGTTCTCCCTGAACGGGTGGCAAATGTGACTG  
5-9 GTATACTTTATTGAGGCCAGGCGCATGCTCTGATGAAGGGA  
5-10 AATTTCTTATACGTTGGGTCATTACCGTCTGCTAACGTTTCAG  
5-11 TAAACCCAGGCCCGGCCAGCTGCATAAATGCGCACATCCTCC  
5-12 GACAACCTTACTGTAAACAAGGTTCAACGTTTGTGTTATAACG  
5-13 GACCTGTGAACCAATGATAGTGGGCGTCTCGAGTCGCCCTA  
5-14 ATGGGCCAAGCATGTATACAAACCCGTATAGCCATAACCGA  
5-15 CCTAAGTCCGAGTTTTTTTTTTTTTTTTTTTTTTTCATCAAATA  
6-1 TTTTTTTTTTTCTAGCTCACCAGTGATCCGACCTTTTTTTTTT  
6-2 ACTTCACTATTTAAGGTGTTGGGAGACGAGTTCGTTGGCGGG  
6-3 ATTTAGACTAGTCGCTGGATGCTTATTATTAGACCCCTGAGC  
6-4 CAGAAAGTGAGGGCCTCAGGTCTGCTTTGCTCAGCTAGGCAC  
6-5 GGTCAAGTCAACGGTCACTCTAGGGTGATGGTCCFTTTGTGT  
6-6 AAAGCTCGGATTAGCGCCCGGCTGAGTTTGTCTATGAGAATCG

6-7 AATTCCAGCGGGCTAATCATATTGGTTTGAGATAAGAATCCT  
6-8 CTCTTTCAGCTGAGTGGTGTCCGACAAGGGACCTCCCGAGGG  
6-9 GCCATGCATCGCTCCACAACAAATAAAGTATAACCAGGGAGAA  
6-10 GCTACCCTTTATCTGTGAGCCGTATAGGAAATCTGGGCCTC  
6-11 AAGGCATTTAAGGAGGAGTTAGGCCTGGGTTTATGACCCAAC  
6-12 AACTTATGGGCGTAATTGGCCAGTAAGTTGTCAGCTGGCCG  
6-13 ACTCCTCAGATCTTACTGCACGGTTCACAGGTCCCTTGTTTA  
6-14 TCGTGACCGACCGGAGGCTCCTGCTTGGCCATACTATCATT  
6-15 ATATCGGCCACCTAGCGCATACTCGGACTTAGGTTGTATACA  
7-1 TTGCACGACCGTATCGTCTCTAATAGTGAAGTGGTGAGCTAG  
7-2 ACTTACAACGCCTGAAATAAGCTAGTCTAAATCAACACCTTA  
7-3 AATAATTACCTCACATACGCTCTCACTTTCTGATCCAGGCGA  
7-4 CTGGTCATCTCAGAATGAGAATTGACCTGACCACCTGAGGCC  
7-5 TAGCGTGAATGGATGAGACGCATCCGAGCTTTGAGATGACCG  
7-6 GTCACTCAAGTCATTGGAAGCCCCTGGAATTCGGGGCGCTA  
7-7 TGTATTGTGATCTAACC CGACAGCTGAAAAGATATGATTAGC  
7-8 ACACCTGCTTGGTCTGGGCTGCGATGCATGGCGACACCACTC  
7-9 ACGTACCGTCATCAATCAACGTAAAGGGTAGCTGTTGTGGAG  
7-10 AGGGACCTCTCAACCGGACGATTAATGCCTTGGCTCACAGA  
7-11 GCGCGCTGTTGGGATGCCATTGCCATAAGTTTAACTCCTCC  
7-12 CGTCCGGACCTCATCTGACCGATCTGAGGAGTGGCCAATTAC  
7-13 TCGGCTCAAGCATAGCGGACCGTCCGGTCACGAGTGACGTAAG  
7-14 AATGGCCTTCGCAGAATTCACGTGGCCGATATGGAGCCTCCG  
7-15 TCGTCTGTTTTCCGTTTTTTTTTTTTTTTTTTTTTTTATGCGCTAG  
8-1 TTTTTTTTTTTTGGACATTCCCTACGGTCTGCAATTTTTTTTTT  
8-2 TGCGAAGGCCGAAGCTGGCAGGGCGTTGTAAGTAGAGACGAT  
8-3 TGCAGGCGGGCCAAAGGATAAGAGGTAATTATCTTATTTCA  
8-4 GCTTCCGTTGCTGATGCCATTTGAGATGACCAGAGCGTATGT  
8-5 CAGGCGAAATCAGCGTTGGCTCCATTCACGCTATCTCATTC  
8-6 AGCGCTGGAGGGCTCAATGTTGACTTGAGTGACCGTCTCAT  
8-7 AATGGTGTGCCGAAGTCGTGCGATCACAATACAGCTTCCAAT  
8-8 CAGCCTCTTCGCTCGGATACACCAAGCAGGTGTGTCGGGTTA  
8-9 AGCGTCGCTTCCAGTGATAGCATGACGGTACGTCAGCCCAGA  
8-10 AATCAGGTGGGAAAGTACTGCTGAGAGGTCCCTCGTTGATTG  
8-11 TACAGATTAGTTTTCGGCAGGACCAACAGCGCTCGTCGCGT  
8-12 GGGCGCTTCGCCGTGCCCATTTGAGGTCCGGACGAATGGCATC  
8-13 CCAGTCGAGGAAAGTATCGAATGCTTGAGCCGACGGTCAGAT  
8-14 AGTGGGAGTCTTACAGAGCCCCGGAAGGCCATTGGTCCGCTA  
8-15 GCCCGGAAACGCATAGCTATTCGGAAACGACGAGTGAATTTCT  
9-1 AATCTCCCACGCATTGGACCTCGGCCTTCGCAAGGAATGTCC  
9-2 TCAGTGTATAACCGACTGTAAAGCCCCGCTGCACTGCCAGCTT  
9-3 GCCTTCGCACAGTGGTCTGACGCAACGGAAGCTTATCCTTTG

9-4 GTCTAGGTATCCCTGCTGGGAGATTTTCGCCTGAATGGCATCA  
9-5 GCCGGAATTTGCTAGCATTTACCTCCAGCGCTAGCCAACGCT  
9-6 ATTACCTTTATTATATTACGCGGCACACCATTAACATTGAGC  
9-7 GACATATTCCCGTGGCTGGACCGAAGAGGCTGGCACGACTTC  
9-8 TGTTATAGGTACACTGGAAGCTGAAGCGACGCTTGTATCCGAG  
9-9 TTCCCCTGGTCCGGTCATCTCCACCTGATTGCTATCACTG  
9-10 CCAGTTAAAGGACCACCTGAGACTAATCTGTAGCAGTACTTT  
9-11 CGGGTATTCCCTGCCAATCCCTGCGAAGCGCCCTCTGCCGAA  
9-12 CTATTAACCACTTGTGCGCGCTCCTCGACTGGAATGGGCACG  
9-13 TATCTTGCTACCAAGCAATCGAGACTCCCCTTTTCGATACTT  
9-14 TGACGACGAGGGGTGAGCGGATCGTTTCCGGGCGGGCTCTGTA  
9-15 TCCGTAATTCGTTTTTTTTTTTTTTTTTTTTTTAATAGCTATG  
10-1 TTTTTTTTTTCTGTCTCGTAGCGTGGGAGATTTTTTTTTTTT  
10-2 TAGTAAACTCCAAGGCTACCCGGTATACACTGAAGGTCCAAT  
10-3 TGTAAGTCGATTAAACCACTGCTGTGCGAAGGCTTTACAGTC  
10-4 CAGAAATATTGAACTGTGATTGGATACCTAGACGTCAGACCA  
10-5 TGAGAGCTCTGATGAATTCGCGCAAATTCGGCTCCCAGCAG  
10-6 TTTCTAGTTGAATATCCACGAATAAAGGTAATTAATGCTA  
10-7 CTGGGCGGAATCCCTTCAGTCCGGGAATATGTCGCGTAATAT  
10-8 CTGTGCGATGGCGTAGGAGGAGTACCTATAACAGTCCAGCCA  
10-9 ATCGCATTGAAACTGGACGAGGACCAGTGGGAAAGTTCCAGT  
10-10 CAGAGTGCCGTGAGGTGAGGTTCCCTTTAACTGGAGATGACCG  
10-11 ACGCCTACTCTTGTACCTGGGCAGGAATACCCGCTCAGGTGG  
10-12 TCAGAATACCAAGGATTCAGTAGTGGTTAATAGAGGGATTGG  
10-13 ATGGGCTGTATTGGCCCATTCGGTAGCAAGATAGCGCGCACA  
10-14 GTATGAGACAATATGAGAGATCCCTCGTTCGTCACGATTGCTT  
10-15 CGACCGCTGCAGGCGCACATCACGAATTACGGAATCCGCTCA  
11-1 CGTCTGTGAAATTGGACAGTGGAGTTTACTATACGAGACAG  
11-2 CGGCTACGGCTGTGCCTGTTCGATCGACTTACAGGGTAGCCTT  
11-3 GATTATCTCGGATAACCACGCTCAATATTTCTGCAGTGGTTTA  
11-4 CTGTAGGTATACATTAATAACAGAGCTCTCAAATCACAGTT  
11-5 CTAGAGGTCTCCGAGGGCTTGCAACTAGGAAAGCGAATTCAT  
11-6 CCGATTACAGTTTGACTCGTTATTCCGCCAGCGTGGATATT  
11-7 ACATCGTTGCATGTTCCCTGGACCATCGCACAGGACTGAAGGG  
11-8 GCTACGGAACATCCAGTCTCCTTCAATGCGATTCTCTCCTACG  
11-9 ACAGACGAGCTATCGATCTGAACGGCACTCTGCTCGTCCAGT  
11-10 AGCGGACGGAGGCTTTACGCAAGAGTAGGCGTACCTCACCTG  
11-11 GTTGACACGACCCTCTGTTTGTGGTATTCTGACCCAGGTACA  
11-12 CCGGATTATACGGTTACAAGATACAGCCATACTGAATCCT  
11-13 CGCGGTCTCGAGTGTTAACCATTGTCTCATAACGAATGGGCCA  
11-14 ACCGATGCTAAATCAATGGTTTGCAGCGGTCGATCTCTCATA  
11-15 TCGGACCGCAACTTTTTTTTTTTTTTTTTTTTTTGGATGTGCGCC

12-1 TTTTTTTTTTTTCCACAACCAGTTTCACAGGACGTTTTTTTTTT  
12-2 ACGTGTACCCCAAGGAGAGTCCAGCCGTAGCCGACTGTCCAA  
12-3 AGTGCACGAGGAGGGCGTCTCTCCGAGATAATCCGACAGGCA  
12-4 ATAGCATGTGCGGCAGGAATTGTATACCTACAGAGCGTGGTA  
12-5 CCTAGTGCATCAGCGCACGACGGAGACCTCTAGTTATTTAAT  
12-6 GAGATCTAGAGAGGGTTTACGAACTGTAATCGGCAAGCCCTC  
12-7 CTCATATCTTTAGTTAGTGGTATGCAACGATGTAACGAGTCA  
12-8 AGAAATGAGCCGTGACCCAACATGTTCCGTAGCTCCAGGAAC  
12-9 CAACCGAGGGCGCAATCGCGGTAGCTCGTCTGTGGAGACTGG  
12-10 TGAAGTTTACGCCTAGTATCGCCTCCGTCCGCTTCAGATCGA  
12-11 GATCGGTGCGTGCTCAATTACGGTCGTGTCAACTGCGTAAAG  
12-12 GATTACGACAGACAGTATTTTCGTATAATCGCGGCAAAACAGAG  
12-13 GATACTGACTTCGAAGATGTGCTCGAGACCGCGCTTGTAACC  
12-14 TTGAGAGCAGCACGCACCTCATTTAGCATCGGTTGGTTAACA  
12-15 ATGTATCGTATAAGACAGAATGTTGCGGTCCGAAACCATTGA  
13-1 CATGACACTTAAACATCTAATGGGTAACACGTCCTGGTTGTGG  
13-2 TCCGAAAGGTGCGGTGGCCTCTCCTCGTGCCTGACTCTCCTT  
13-3 TTCAATATGGGCTGGGACGCCGCACATGCTATGAGACGCCCT  
13-4 CTGGACATGTGGGCATCAAGAGATGCACTAGGAATTCCTGCC  
13-5 TCATCCTACATCCCTAAAGGTCTCTAGATCTCGTCGTGCGCT  
13-6 GGGTCCGTTCAACGAAAGACTAAAGATATGAGCGTAAACCCT  
13-7 CAGGGCGTAGCAAATATTTACGGCTCATTTCTACCACTAACT  
13-8 TCTAATGTTATTACCTTGGCAGCCCTCGGTTGGTTGGGTCAC  
13-9 ATCAAGCCGCTGTGATTATCCGTAAACTTCACCGCGATTGC  
13-10 GCTGCAGAGCCCTCTTGCACAACGCACCGATCCGATACTAGG  
13-11 AATTGGTTATCTAAGGACTGGCTGTTCGTAATCGTAATTGAGC  
13-12 GAAAGGATTATAGAGGACTATAAGTCAGTATCGAAATACTGT  
13-13 GAAAGCAGAATGATTTACTAAGCTGCTCTCAACACATCTTCG  
13-14 GCATGCGTGATACTAACTACAATACGATACATTTGAGGTGCGT  
13-15 AACTATCGATGGTTTTTTTTTTTTTTTTTTTTTTTATTCTGTCTT  
14-1 TTTTTTTTTTTTGGCCTAAGCATTAAAGTGCATGTTTTTTTTTT  
14-2 ACGATTTAGGCCACTACTAATCGACCTTTCGGAATTAGATGT  
14-3 CACGGGCTCGAATCGTTAACTGCCCATATFGAAAGAGGCCAC  
14-4 AAACAGGAGAACCCTGAGTCGCCACATGTCCAGGGCGTCCCA  
14-5 CTCATCCCGGGCGTTTGGACCGATGTAGGATGATCTTGATGC  
14-6 GAGCTTGGGAGGTCCCAATGGTTGAACCGACCCACCTTTAGG  
14-7 GAAATTCCGATAGCCGTGCGATGCTACGCCCTGAGTCTTTTCG  
14-8 GACTCATGGTCTGTGCTGCCAAATAACATTAGAGTAAATATT  
14-9 GCGAGATACACGGTTCAGGATAGGCGGCTTGATTTCGCAAGGT  
14-10 CTTAGAACTATCGGAGCGCTCGGGCTCTGCAGCGATAATCAC  
14-11 GGACGATCCTTGTGTCTCCCAAGATAACCAATTTGTGCAAGA  
14-12 CTTAGTGGGCAAATAAACGTGTATAATCCTTTCCAGTCCTT

14-13 GGTAAGTGACGTGTTTAGAATCATTCTGCTTTCATAGTCCTC  
14-14 TAGTATAACCGTCACAGAGGTTATCACGCATGCTTAGTAAAT  
14-15 TTGCAAACCTCAGAATGGCACTCCATCGATAGTTTGTAGTTAG  
15-1 ACGCATATTGCCGGCACCTAAGCCTAAATCGTTGCTTAGCGC  
15-2 GCAGCGGTCTCTGCCAGAACCGTCGAGCCCGTGATTAGTAGTG  
15-3 GGACATTATATGCTGCCATGGTTCTCTGTTTAGTTAACGAT  
15-4 CACGTGACTCAGTCTATTATCCCGGGATGAGCGACTCAGGG  
15-5 TACACTAATCTTCGAGGCTGCCTCGCAAGCTCGGTCCAAACG  
15-6 TTGAGGTTGGAGGACATATCCATCGGAATTTCCCATTTGGGAC  
15-7 GAGCTCGGACGCGTCCGCGTGGACCATGAGTCTCGCACGGCT  
15-8 GCTTAGTCGCCGAGAAAGATAGTGTATCTCGCTGGCACGACA  
15-9 ACGGTAGACTCTCGTGCTTGGATAGTTCTAAGATCCTGAACC  
15-10 TCGCCCTACTGTTTACAGTTGAAGGATCGTCCGAGCGCTCCG  
15-11 CTTTTCGTAACAGTCTCTGTTCTGCCCACTAAGTGGGAGACAC  
15-12 TGGAACCGGTGTGGCGCCCATCGTCACTTACCCACGTTTATT  
15-13 TATGCGAGTTTAATGGGCTCTCGGTTATACTAATTCTAAACA  
15-14 AGGACACACAGCTTTCCTGCTGAGTTTGCAAACCTCTGTGA  
15-15 CAGTCCAAGGCGTTTTTTTTTTTTTTTTTTTTTTTAGTGCCATTC  
16-1 TTTTTTTTTTTCTTCATTCTCGGCAATATGCGTTTTTTTTTTT  
16-2 GACGGGCGGGACTGTTGGAGTCAGGACCGCTGCTTAGGTGCC  
16-3 GTAAGATCGTTTACCCTAGTTCATATAATGTCCCGGTTCTGG  
16-4 CCCATAGTTTGGAGGTTCCCACTGAGTCACGTGCCATGGCAG  
16-5 AGATGCGCTCATAACATCTCAAAGATTAGTGTAATAATAGGA  
16-6 TACGGTGCAGATTAATTCTACTCCAACCTCAAGCAGCCTCG  
16-7 GACTCTGAACCCTACCTAAGTGCGTCCGAGCTCGGATATGTC  
16-8 ACGTGACATAAGCATCAACCTCGGGCGACTAAGCCACGCGGAC  
16-9 TCTTTAGCATGCATCGTGTAGAGAGTCTACCGTTATCTTTCT  
16-10 GGCGTTATCATTAGATTTACCACAGTAGGGCGACCAAGCACG  
16-11 CTGTGGGGCAACGACTTAGGCTGTTACGAAAGCAACTGTAA  
16-12 TTTCTTTATGCCGCTATTTACACCCGTTTCCAGAACGAGGA  
16-13 GACTTTGGCTTCTTGACGCTTAAACTCGCATAATGGGCGCC  
16-14 GCAGATCCAATCGTTATTCCAGCTGTGTGTCTAGAGCCCAT  
16-15 CACCCTTAGACGAGAGTTGTACGCCTTGGACTGGCAGGGAAA  
17-1 CTTAGTATAGGCCCTTCTCGCTTCCC GCCCGTTCGAGAATGAAG  
17-2 CTTAGGTTGCGAGGTGTTCCCTAACGATCTTACACTCCAACAG  
17-3 TCTCTTATGAGTGCAGTCTTGCAAACCTATGGGAACCTAGGGTA  
17-4 TCTTCTAAATGCGACCGGTAAGTACTGAGCGCATCTTGGGAACCT  
17-5 CCTTAAGCTGGGCCAAGGTATCTGCGACCGTATGAGATGTTA  
17-6 AAATGATGCTCTATACAAAGCGGTTTACAGTCTAGAATTAAT  
17-7 CGTCGCCTTGAGGGTCTGCTTATGTCACGTAAGTTAGGTAG  
17-8 AACAATATTGGCGACTGTGCTCATGCTAAAGAAGGTTGATGC  
17-9 TTACCGAGGTAGACTTTCCTATGATAACGCCCTACACGATG

17-10 TTAATCATGTTGGTACTACGTTTCGCCCCGACAGGGTAAATCTA  
17-11 TACGTGGAGGTGCGTAAGGCAGCATAAAGAAACCTAAGTCGT  
17-12 GTCGCGCATCGTTAAGCCCCGTAAGCCAAAGTCGAAATACGCG  
17-13 CCATGCATCGGCTGTAGTCCAATTGGATCTGCAGCGTCAAGG  
17-14 GGGCCTATTCATGGTCCCTACTGTCTAAGGGTGTGGAATAACG  
17-15 GTATTATCGATATTTTTTTTTTTTTTTTTTTTTTTTACAACCTCTC  
18-1 TTTTTTTTTTTTCATACTCCCGGCCTATACTAAGTTTTTTTTTTT  
18-2 GCTTCCATATTGTATACTGTATCGCAACCTAAGAGCGAGAAG  
18-3 GCAGAGTAGTAGACCATCGAAACTCATAAGAGAAGGAACACC  
18-4 GCTACTTTCACCCTTTAGCGAGCATTTAGAAAGACAGGACTGC  
18-5 AAGCGCAAAGAACGGCCCATGCCCAGCTTAAGGGTACCGGTC  
18-6 CGTCTCATGTGCGCCCTCGCTAAGAGCATCATTTATACCTTGG  
18-7 CTCTATCCACCCTTCGTAGGACTCAAGGCGACGGCTTTGTAT  
18-8 TTTAGTTGAACTCGAGTGAAGGCCAATATTGTTGGCAGGACC  
18-9 AGCCAGGATCAACCAACTCTGCTACCTCGGTAAACGACAGTC  
18-10 CAAGGAAAGCATTTCCCTGCTCAACATGATTAAAGTGAAAGT  
18-11 GGCTAAGCGTTGCGAACTCCGCACCTCCACGTAACGTAGTAC  
18-12 ATGACTGTTTCACACTGGAGCACGATGCGCGACTGCCTTACG  
18-13 TTCCAAATCCACAAGTGAAGGGCCGATGCATGGACGGGCTTA  
18-14 AACCTACGGTCTGTACCCTATATGAATAGGCCCTGGACTACA  
18-15 TTGCTCAATTTACACGCAGATTATCGATAATACAGTAGGACC  
19-1 GGACTCGGTAGCGTTTAATTGAATATGGAAGCCGGGAGTATG  
19-2 AGCTTTATCGACTCGAGTCTCTACTACTCTGCTACAGTATAC  
19-3 ACAGATCGACGTTTAGGGTATGTGAAAAGTAGCTTCGATGGTC  
19-4 ATTAGCGATTGAGAAGCTGTTTCTTTGCGCTTTCGCTAAAGG  
19-5 GTCTAAGCCGATAGTAGATAGGACATGAGACGCATGGGCCGT  
19-6 GGCTGTAAAGAACAAATTGTTGGTGGATAGAGTAGCGAGGGC  
19-7 GACATGCGCCAGGTGGTAGGAGTTCAACTAAATCCTACGAAG  
19-8 ATTGAAGTGCGTCCCTGCGTGTGATCCTGGCTCTTCACTCGA  
19-9 AAAGCGACCTAATTCTAATAGTGCTTTCCCTTGACAGAGTTGGT  
19-10 CGGACACCAGATGCTGATCTCAACGCTTAGCCAGCAGGGAAA  
19-11 GCGCTATCTGCTCAGTATCTAGAAACAGTCATCGGAGTTTCGC  
19-12 GGCCGCGTTCGACTAGACCCGTGGATTTGGAAGCTCCAGTGT  
19-13 CTAAGGACGTAATAACCCTCGACCGTAGGTTCCCTTCACTTG  
19-14 CTGGAAGTTCCGCTATCCCAGAAATGAGCAAATAGGGTACA  
19-15 CTGTATCATATCTTTTTTTTTTTTTTTTTTTTTTTTATCTGCGTGT  
20-1 TTTTTTTTTTTAATGCCCATCGCTACCGAGTCCTTTTTTTTTTT  
20-2 AGCAATACTTTCTGTGGGAGGGTCGATAAAGCTCAATTAAC  
20-3 AGAGCTGAGTGTTTACACGGCACGTCGATCTGTGAGACTCGA  
20-4 TGCCAAGAGTCCATAACCGTGTCAATCGCTAATATACCCTAA  
20-5 CATAACCAACAATTTAGTTGTATCGGCTTAGACAACAGCTTC  
20-6 GAATTATTCAATGCAACGAGCTTCTTTACAGCCCTATCTACT

20-7 ACGCGCGGGCCTGTTCGGAGCCCTGGCGCATGTCAACAATTTG  
20-8 TCTAGTGCATACAAATTCGGTACGCACTTCAATTCCTACCAC  
20-9 TAATTGCATTGCAGTAGGCTCTTAGGTCGCTTTCACGCAGGG  
20-10 GTTTCTGTTCCGTACCGATGGATCTGGTGTCCGCTATTAGAA  
20-11 GACGCGGGCGGTACAAATTCGCAGCAGATAGCGCGAGATCAGC  
20-12 GTAGGAAACTAACGCTCTTGATCGAACGCGGCCCTAGATACTG  
20-13 TTTAAGAAGCTGAGCGTAGCTGTACGTCCCTTAGCGGGTCTAG  
20-14 CAATTATAGTAATGGTAACCACGGAACCTCCAGGAGGGTATA  
20-15 CTTTCAGTGATAGATGAAAGAGATATGATACAGGCGGGATAG  
21-1 CTGCTTATCCAGACCATTTCCAAAGTATTGCTGATGGGCATT  
21-2 ACAGTCCCGTCTACGGGCCAGCACTCAGCTCTCCTCCCACAG  
21-3 GCGTGGTACGTAGCCGGAGCAGACTCTTGGCAGCCGTGTAAA  
21-4 TGTATTTCTACAACCTTGTACGTGTTGGTTATGGCACGGTATG  
21-5 CATGCATGTCTAACGTTCGGATTGAATAATTCACAACATAAT  
21-6 GGTCTTCTACTGTAGGAGGACGGCCCGCGGTGCTCGTTGCA  
21-7 GCATCTTTCAGCGCTCAATCATATGCACTAGAGGCTCCGACA  
21-8 CCCTGAAACTCTACAGAGGGCCAATGCAATTAACCGAATTTG  
21-9 CATCTAGAAAAGGGCGTTGGGTGGAACAGAAAACGAGCCTACTG  
21-10 ATCTTTGATCTGCGGGACATAACGCCCGCGTCCCATCGGTAC  
21-11 TGGTAGTTCCCTTCTTTTCGGCGTAGTTTCTTACGCGAATTTGT  
21-12 GAACGAAGGTTTACTGTGACTAGCTTCTTAAATCAAGAGCGT  
21-13 TGGGACAAGACATATACACCTTACTATAATTTGAGCTACGCTC  
21-14 GTTGCACCACGCAAGATAGCATCACTGAAAGTGGTTACCAT  
21-15 CTTTAAAGCCGGATTTTTTTTTTTTTTTTTTTTTTTCTTTTCATCT  
22-1 TTTTTTTTTTTTTCGGGCGAAACTGGATAAGCAGTTTTTTTTTT  
22-2 GTACCAGCTGGTGTCTTGATAGAGACGGGACTGTGGAAATGGT  
22-3 TAGAGGGCTATTGGAGGGAGTTACGTACCACGCCTGGCCCGT  
22-4 TGGATGTTTAGGGCGGACAGTTGTAGAAAATACATGCTCCGGC  
22-5 TCTGTATTGGACCCTATGAAATAGACATGCATGCGTACAAGT  
22-6 GGCCCTTTAATAAACCTAGGCCAGTAGAAGACCTCGCGACGT  
22-7 TTGGTCCATCAGAGATGCGGCTGAAAGATGCGTCCCTCCTA  
22-8 CGAGCGGGCATTATATAGCGACAGAGTTTCAGGGTGATTGAGC  
22-9 AGCATGTAGTGGGCCGTGGAGCCTTCTAGATGGCCCTCTGT  
22-10 GAAGTCGTTTATTATTAGTCACAGATCAAAGATACCCAACGC  
22-11 GGTGCAGGAGGAGCAGACTCAAAGGAACTACCATATGTCCCG  
22-12 TTACTTGCTTCATTTAGCGATAAACCTTCGTTCGCGCGAAAAG  
22-13 GGCAATTAGAGAATTGTATCCTGTCTTGTCCCAAGTCACAGT  
22-14 CTTACGCTGAAGCGCCTTTAGCGTGGTCGCAACAGGTGTATA  
22-15 CCAAAGACGAAAGACCGTTTATCCGGCTTAAAGGCTATCTTG  
23-1 TTCTAAAGTGGCTCTAATCGACCAGCTGGTACTTTCGCCCCG  
23-2 CAGAAGGTGATAAATTCGAAGATAGCCCTCTACTATCAAGCA  
23-3 GCCTCGCCCTGTCTGACTCGTCTAAACATCCAACCTCCCTCCA

23-4 CTGAAGCTCCCTCGACACGTGTCCAATACAGAACTGTCCGCC  
23-5 CAGCGGAGTCTATATCTACGTATTAAGGGCCTTTCATAGGG  
23-6 GACCCACTAAGTGGTTTTCCGCATGAGGACCAAGCCTAGGTTT  
23-7 GACTGTGCTCCCTGGACCCGAATGCCCGCTCGCGCATCTCTG  
23-8 TGAGGTACAGCGTTTCGTGTCACACTACATGCTGTCGCTATAA  
23-9 GAGTAGCATTAGGCACAGCAGTAAACGACTTCTCCACGGCC  
23-10 TGCTGCGTTCGTGCGTGTCTCTCCTCCTGCACCTGACTAATAA  
23-11 CGTTGGCAGCACTTCTACCTAGAAGCAAGTAATGAGTCTGCT  
23-12 AATTCTCGTGC GCGGGTGAGTCTCTAATTGCCATCGCTAAAT  
23-13 TGGTAGAAAGAAGGGAGGCTCTTCAGCGTAAGGGATACAATT  
23-14 GACCCAGGGTTAGTTCGGGAGTTCGTCTTTGGCTAAAGGCGC  
23-15 ACTTCGTGCTTGTTTTTTTTTTTTTTTTTTTTTTTTTAAACGGTCT  
24-1 TTTTTTTTTTTAGGTAGGCAGGCCACTTTAGAATTTTTTTTTT  
24-2 TACAAACGTGTCTTGTCTTTATCACCTTCTGTGCGATTAGA  
24-3 GTCCCTGGAGCGTTCCGAAATACAGGGCGAGGCCTTGGAAGT  
24-4 GGTACGACACAGCGTGTCTGAGGGAGCTTCAGACGAGTCAG  
24-5 GTCCAGGTCTACTAAATTGTCTAGACTCCGCTGCACGTGTCG  
24-6 GCGTGGTACGTGCATCACCAACTTAGTGGGTACGCTAGATA  
24-7 AAGGGCAAAGCCATTGACGACGGGAGCACAGTCGCGGAAACC  
24-8 ACAACGGGTACTATAGTATCGCGCTGTACCTCATCGGGTCCA  
24-9 GTGGAAGCCCGTTCGGTGTCTCTAATGCTACTCTGACACGAA  
24-10 ACCTGGAAACCGCCCCGATAGGCACGACGCAGCACTGCTGTGC  
24-11 TCACGGTACCAGTCGGAGATGGTGTGCCAACGAGAAGCACG  
24-12 TCTTTCCGTGCGGTTCGTCCGGCGCACGAGAATTTAGGTAGAA  
24-13 AGGGCACGCATAGCTGCCAGCTTCTTTCTACCAACTCACCCG  
24-14 CAGCAAAGCAATGGCTGAAATTAACCTGGGTTCGAGCCTCCC  
24-15 TTGCTCTACTATTATGTGCATCAAGCACGAAGTCTCCGGAAC  
25-1 ACACGTTTGTACTGCCTACCT  
25-2 GCTCCAGGGACAAGGACAAGG  
25-3 TGTGTCGTACCATTTTCGGAAC  
25-4 TAGACCTGGACCAGGACACGC  
25-5 CGTACCACGCCGACAATTTAG  
25-6 GCTTTGCCCTTTGGTGATGCA  
25-7 GTACCCGTTGTGTCGTCAATG  
25-8 CGGGCTTCCACCGATACTATA  
25-9 GGTTCAGGTAGACACCGAA  
25-10 TGGTACCGTGACCTATCGGGC  
25-11 GCACGGAAAGACATCTCCGAC  
25-12 ATGCGTGCCCTCCGGACGACC  
25-13 TTGCTTTGCTGGCTGGCAGCT  
25-14 TAGTAGAGCAAATTTAGCCA  
25-15 TTTTTTTTTTTTATGCACATAA

Motif 3.1 (24H×29T)

| Name | Sequence                                     |
|------|----------------------------------------------|
| 1-1  | CGGGCATCAGCAGAGGGCTGT                        |
| 1-2  | ATCAGCAGTTCCGAGAATGTC                        |
| 1-3  | AAACTTCTACCAACCCTATGG                        |
| 1-4  | CAGTGTATCCCTCTTTGAGTC                        |
| 1-5  | GATCATGAACTTACATAGAAA                        |
| 1-6  | GGGCAAGGAGAGCGACGTGAT                        |
| 1-7  | GCACCTTCGGGACTTCGTCTC                        |
| 1-8  | ACCGGTAGGTACTACGGGCTT                        |
| 1-9  | ATCAACCGTTGTAAGTGAAGT                        |
| 1-10 | GTTGCGAGATCACGTTTAGTC                        |
| 1-11 | GCTGCGGGAGACGTTCTCCTA                        |
| 1-12 | TATGCGGCCTTTCATCTCATC                        |
| 1-13 | TTGGCCTATGGCTGAGGGACT                        |
| 1-14 | CACGGCGAGACCGACGACTAC                        |
| 1-15 | TTTTTTTTTTGTGTGCATCCGA                       |
| 2-1  | TTTTTTTTTTTACAGCCCTCTGCATACTGCTGACATTTCCGAGG |
| 2-2  | TGATGCCCGGACATTTCTCGGACTGGGCCTCCTCGTACAACCTA |
| 2-3  | ACTGCTGATCCATAGGGTTGGGTGTCTACAATACTTCGGAAA   |
| 2-4  | TAGAAGTTTTGACTCAAAGAGGCTCGGGAGTGTGCTGGACACC  |
| 2-5  | GATACACTGTTTTCTATGTAAGTAGCGACGTAACGTTGCACAC  |
| 2-6  | TTCATGATCATCACGTTCGCTCAGGGTAGAAAATCGTCTGAACG |
| 2-7  | TCCTTGCCCCGAGACGAAGTCCACGCGTACCGCTAAGTCCCTAT |
| 2-8  | CGAAGGTGCAAGCCCCGTAGTATGATTACCGCTGACGGCCGTT  |
| 2-9  | CCTACCGGTACTTCACTTACAACAGGCAGATCGCCGATTAGC   |
| 2-10 | ACGGTTGATGACTAAACGTGAGAAAATTGGAGAGTCTAATTCA  |
| 2-11 | TCTCGCAACTAGGAGAACGTTCGGACTTTAAAGCCGAATGCAT  |
| 2-12 | TCCCGCAGCGATGAGATGAAAAGACGGGTACCGGCTTAAGTTT  |
| 2-13 | GGCCGCATAAGTCCCTCAGCCCTATCCCAGCCCATCCCATGT   |
| 2-14 | ATAGGCCAAGTAGTCGTCGGTCCCTGCTTTAGGAATAAGTAG   |
| 2-15 | CTCGCCGTGTTCGGATGCACACGTCGCTTCAAATTTTTTTTTTT |
| 3-1  | ACCCTCGGATAGTATTAATGGGTCAGCAGTATTTTTTTTTTTTT |
| 3-2  | TTATTTAACATACGCGAAACAAGGAGGCCAGCCTCGGAAAT    |
| 3-3  | ACTAAGTCCCTCGCTGGCATGATTGTAGACACTAGTTGTACG   |
| 3-4  | CCGACCCTCTCCCTGCTTGAGACACTCCCAGATTTCCGAAGT   |
| 3-5  | GCACGGTTCCCTTGATAGATATTTACGTCGCTAGGTGTCCAGC  |
| 3-6  | GACCACGTTTCGCAACTTCACTATTTCTACCCTGTGTGCAACG  |
| 3-7  | TTCATTTATGGAAAGTTCCCGGCGGTACGCGTCGTTTCAGACG  |
| 3-8  | TTGTCTTAGACAGTGCAATTAAGCGGTAATCAATAGGACTTA   |
| 3-9  | CTGTTGTCCCTTCTTCTACGGCGATCTGCCTGTAACGGCCGTC  |

3-10 TAGAGTACAAAGCCATCATAGTCTCCAATTTTCGCTAATCGGC  
3-11 CAGCAAGTGATCAGGACACTGCTTTAAAGTCCTGAATTAGAC  
3-12 GATACTCTAAGGATTTATCCGCGGTACCCGTCATGCATTCGG  
3-13 TGC ACTGAAGCGAAACTATAAGGCTGGGATAGAACTTAAGC  
3-14 AGACAAGGTTTTAGTATATGATCTAAAGCAGGGACATGGGATG  
3-15 TTTTTTTTTTAGCTCGAGACACTTTGAAGCGACCTACTTATTC  
4-1 TTTTTTTTTTCCATTAATACTATAACGGCGAGATCACGTCATC  
4-2 TCCGAGGGTTGTTTCGCGTATTATCAATGGCTCTGTGCCGAC  
4-3 GTTAAATAACATGCCAGCGAGTGAGAGAAAGTGTCCGTATTT  
4-4 GGACTTAGTCTCAAGCAGGGAACCCAGATCGACTTATGCTTC  
4-5 GAGGGTCCGATATCTATCAAGTATCTCACCCATGAGATCGC  
4-6 GAACCGTGCAGTGAAGTTGCGGGTCCCCTAAGGAAGGGTTGT  
4-7 AACGTGGTCCGGGAACCTTTCCATACGCATTGCCCTCCAGGTG  
4-8 ATAAATGAATAATTGCACTGTACAGTCTGGGAGTCGTCGCAA  
4-9 CTAAGACAAGCCGTAGAAGAATTGGGATCTTGTAAGGTTCTG  
4-10 GGACAACAGCTATGATGGCTTTACGTTTACGTAGGCTTGGTC  
4-11 TGTACTCTACAGTGTCCCTGATTCCGCTTATGATACCATCGGG  
4-12 CACTTGCTGCGGATAAAATCCTAACGGTTGCACGTTCAGAATC  
4-13 TAGAGTATCTTATAGTTTTTCGCGACCCGGAGTTACACGAGCTTT  
4-14 TTCAGTGCAATCATATACTAAGGGCAGATAGAACGCAATAGT  
4-15 ACCTTGTCTGTGTCTCGAGCTTCCGAACACACTTTTTTTTTTT  
5-1 AGAGCGTATGGTCATCTGAGATCTCGCCGTTATTTTTTTTTTT  
5-2 CCGTTTACCTCCTCCTTATAGAGCCATTGATAGATGACGTGA  
5-3 CGGGTCCCGACCAGGGTTCTAACTTTCTCTCAGTCGGCACAG  
5-4 AGCCAATCCCTACCGCCGTGATCGATCTGGGTAAATACCGAC  
5-5 CCAGCTGTCCGGTGTGCCTTTAGGGTGAGATAGAAGCATAAG  
5-6 CTGATTGTAGCAGGGCTTTAGCTTACGGGACCGGATCTCAT  
5-7 CCACCTGGTTTTGAGCGAGGAGGCAATGCGTATACAACCCCTC  
5-8 GGATATGTTGTTGCTGAGATGTCCAGACTGTCACCTGGAGG  
5-9 GATATTTCCGATAAAAGAACATCAAGATCCCAATTGCGACGAC  
5-10 AAGACACGGTCCGACCCGGACACGTAAACGTACAGAACCCTTA  
5-11 TCCTGTTTTCCCGGGCTACATATCATAAGCGGAGACCAAGCCT  
5-12 AATGGCCCTACTGCCCCTAAGTGCAACCGTTCCCGATGGTA  
5-13 GCGCAGTACAGTTCTCTGTTATAACTCCGGTCGATTCTGAAC  
5-14 CTACGCTAGTATTTAGAGCGATCTATCTGCCCAAAGCTCGTG  
5-15 TTTTTTTTTTGGCTCCCGATCGGTGTGTTCCGAACTATTGCGT  
6-1 TTTTTTTTTTCTCAGATGACCCGCGCCAAACTTCGATCATAT  
6-2 ATACGCTCTCTATAAGGAGGACGATCGACGCGACTTAGAAAAG  
6-3 GGTAACCGGTAGAACCCTGGTATTTCAAGATACAGCCTGTTA  
6-4 CGGGACCCGTCACGGCGGTAGCATATACTGATGTCACGCTGC  
6-5 GGATTGGCTAAAGGCACACCGACGTCGATAAAATAGTGCCCTCT  
6-6 GACAGCTGGCTAAAGCCCTGCCTGTAAATGCGCCTGCCTAGG

6-7 TACAATCAGCTCCTCGCTCAAAGTGGGCTTCCCTGAACATCC  
6-8 ACCAGGTGGCATCTCAGCAACAAATTGCGACGAATGGCCCTT  
6-9 AACATATCCATGTTCTTTATCCGAGTGCTAATGTGCTCAGTG  
6-10 GGAAATATCGTCCCGGTCCGATCTCAATACCCTGTCTAGCGT  
6-11 CCGTGTCTTTATGTAGCCCCGGCGGTAGGGCCTGCTTCCCGA  
6-12 GAAACAGGATTAACGGGCAGTGTATTTAAATGGGCTGACAGG  
6-13 AGGGCCATTTAACAGAGAACTTTCAGCGGGCCAGTGAGACAG  
6-14 GTACTGCGCTCGCTCTAAATAGGCATATAATTCGCCCTTAAG  
6-15 CTAGCGTAGCGATCGGGAGCCGAAGGTAAAGCTTTTTTTTTTT  
7-1 CGCGGCCGAAGACGTCTTCGGAGTTTGGCGCGTTTTTTTTTTT  
7-2 TAAGTCTTAAACTATATATAACCGCGTCGATCGATATGATCGA  
7-3 CTTTGTGACCCGGAAGCGTTATATCTTGAAATCTTCTAAGT  
7-4 CCGTGATCCCACGATTCCGCGATCAGTATATGTAACAGGCTG  
7-5 TGATGACACATGTCTATACTGTTTATCGACGTGCAGCGTGAC  
7-6 GGCACCTTTGAAGGAGAACTTACGCATTTACAGAGAGGCACTA  
7-7 TAATTAACCGCTTCTGCAGGCGGAAGCCCACTCCTAGGCAGG  
7-8 TCGTAATTTGCTCACCGGTAACGTCGCAATTTGGATGTTTCAG  
7-9 CTGAGATCAGCAGTGTCTATAATTAGCACTCGAAGGGCCATT  
7-10 AAGATCGAGCGACACACCCTAGGGTATTGAGACACTGAGCAC  
7-11 CCATCTGCTTGGTCGAGATACGGCCCTACGCGACGCTAGACA  
7-12 TAGAGATACCGGCGGATGTCTCATTTAAATACTCGGGAAGCA  
7-13 CCGCCTTTACCCAACGTGCTGGGCCCGCTGAACCTGTCAGCC  
7-14 GTCGACCAGATCCTTGTGCGTAATTATATGCCCTGTCTCACT  
7-15 TTTTTTTTTTGTCTTTATTCTTGCTTTACCTTCCCTTAAGGGCG  
8-1 TTTTTTTTTTCCGAAGACGTCTCGTGCGTGTCCGGGTCCCTCAG  
8-2 TCGGCCGCGGTATATATAGTTTGATTCCGCTTTAGCGCCCTC  
8-3 TAAGACTTATAACGCTTCCGGTGTAACACCAATAGCAACCGT  
8-4 GTCACAAAGCGCGGAATCGTGAGGATATGTGTACTCTGAAC  
8-5 GGATCACGGCAGTATAGACATAGGGTAAACCGGTAAAGTGGG  
8-6 GTGTCAATCATAAGTTCTCCTTTAACGGTTTCAGCAATGTCTT  
8-7 CAAAGTGCCGCTGCAGAAGCAAGGGCGTTAGTTGTCGGTCC  
8-8 GGTTAATTATTACCGGTGAGCGACAGTGGCCGAAGTAAGGTT  
8-9 AAATTACGATATAGACACTGCTCGTGCCAAATCACACCTAGT  
8-10 TGATCTCAGTAGGGTGTGTGCGTTGCGTCATGCCGGATCCTT  
8-11 CTCGATCTTGTATCTCGACCAGATTTAAATGTTGCAACAAGGC  
8-12 AGCAGATGGAGACATCCGCCGCCGGGTAGGCATTTCTTCCCTC  
8-13 GTATCTCTACAGCACGTTGGGCTCAATAGACAGGCCGCGTAA  
8-14 TAAAGGCGGACCGACAAGGATGCATTCAGCAGGAACCCGTGC  
8-15 CTGGTCGACAAGAATAAAGACTCCAACGGGTGTTTTTTTTTTT  
9-1 CGCGCTCCGTTCTGGCGTTCAGGACACGCACGTTTTTTTTTTT  
9-2 TCTGCTATAACATTTCTAGAGGAAGCGGAATCACTGAGGACCC  
9-3 CAGTTATGTGCCAAATCTAGTTTGGTGTACAGAAGGCGCTA

9-4 GCTACGCCACGTGACGATTGTCACATATCCTCACGGTTGCTA  
9-5 ACGGATTGACGGACGTTGGGCCGGTTTACCTGTTTCAGAGTA  
9-6 CAGCCACACATCCGCGACTTATGAAACCGTTACCCACTTTAC  
9-7 ACGGGCTCCTCGCCGGAATTGCTAACGCCCTTAAGACATTGC  
9-8 CCACGGCTTCCCATCTTCAGCCGGCCACTGTCGGACCGACAA  
9-9 AATACGCGTGACCTCGCCAGATTTGGCACGAAACCTTACTT  
9-10 GATAACCTGCAGGCTTTTCGCTCATGACGCAACACTAGGTGTG  
9-11 CCTCCCTCAAGGAATGGTATAAACATTTAATCAAGGATCCGG  
9-12 ATTCATAGTGTGTCCATACATTGCCTACCCGGGCCTTGTTGC  
9-13 GGTGTCTCCGTCCCATTTGTTTGTCTATTGAGGAGGAAGAAA  
9-14 TTTAACAGAAGGCACGGTGACCTGCTGAATGCTTACGCGGCC  
9-15 TTTTTTTTTTATTCTAGACTTGCACCCGTTGGAGCACGGGTTC  
10-1 TTTTTTTTTTGAACGCCAGAATCACCGAACAGTATTTCTGGG  
10-2 CGGAGCGCGCCTCTAGAATGGCCAATAAGGTTTGCGAATTAA  
10-3 TATAGCAGAAGTAGATTTGGCTAGGTGGGTTTAATGAACATT  
10-4 ACATAACTGACAATCGTCACGCAAGCAATTACGAGGGCCTAA  
10-5 TGGCGTAGCGCCCAACGTCCGAGCATTAGAAGGGTATCGAGT  
10-6 TCAATCCGTTAAGTCGCGGATGATAACTGCGGAAGTCGTTGT  
10-7 GTGTGGCTGCAATTCGGCGAATAAGCAGAAGATAGAGGTCT  
10-8 GGAGCCCGTGTGAAAGATGGGAGTAAGACCTCACTCAGAAAC  
10-9 AAGCCGTGGCTGGGCGAGGTCCCTTCGTTTACAGATTTAGACG  
10-10 ACGCGTATTAGCGAAAAGCCTGCGTGGGTCAGCCGTAATGATG  
10-11 CAGGTTATCTATAACCATTCCCTGAGGGCGAACAGGGACATAAA  
10-12 TGAGGGAGGATGTATGGACACTACCCGCCCAAACCGAGTTCG  
10-13 ACTATGAATAACAAATGGGACAAGCCGGTCTCGCAACTCAGT  
10-14 GGAGACACCGTCACCGTGCCTTGTTCATTTCAGACCCGTGGGCA  
10-15 TCTGTTAAACAAGTCTAGAATGTTGACAATTATTTTTTTTTT  
11-1 ATCTTACCGCCTGTTCGAGCCGCTGTTTCGGTGATTTTTTTTTT  
11-2 CCCACGGGTTTAGAGGTAAGGAACCTTATTGGCCCAGAAATA  
11-3 TGGCAGGGCTAGGATATGCAGAAACCCACCTATTAATTCGCA  
11-4 ATCCCTGGGTAGGATGAGAACGTAATTGCTTGAATGTTTCATT  
11-5 CTCCTTCGATCACTCGATCACCTTCTAATGCTTTAGGCCCTC  
11-6 CGCATTCCATCATGCCACAGCCCGCAGTTATCACTCGATACC  
11-7 CGTTATCCTAGTAGCTATTCTCTTCTGCTTATACAACGACTT  
11-8 CGAGTAACTGGTGTATTGTATGAGGTCTTACTAGACCTCTAT  
11-9 CGCTGACAGTGAGAAATGATCTGTAAACGAAGGTTTCTGAGT  
11-10 TGGAGCTGAGTCGCTGGCCTAGCTGACCCACGCGTCTAAATC  
11-11 TTAAGGACCGAAGGGTGAAAGTGTTCGCCCTCCATCATTACG  
11-12 AAAGGCTTGTCTCCAAGTGGTGGGCGGGTATTTATGTCCC  
11-13 GTACGAAGGAAGAACTCTATGGAGACCGGCTTCGAACTCGGT  
11-14 ACAATTCTATGCTTTAATCTCTCTGAATGACAACCTGAGTTGC  
11-15 TTTTTTTTTTGGAGAACAGTGGTAATTGTCAACTGCCACGGG

12-1 TTTTTTTTTTCGGCTCGACAGGAACCCGCACGCGGTAACCTCC  
12-2 CGGTAAGATCCTTACCTCTAATAATATGTTCTTCTCGTTCTC  
12-3 ACCCGTGGGCTGCATATCCTATACGTAAGATAAACTACTCGT  
12-4 GCCCTGCCAGTTCTCATCCTAGCGGGTCTTGACCGCTGAGG  
12-5 CCCAGGGATGTGATCGAGTGAACAAACACATGCTGCCACCC  
12-6 TCGAAGGAGGCTGTGGCATGAACATCATTTCCAAGGAGTGGCG  
12-7 TGGAATGCGAGAATAGCTACTTAATCTTCCCTGACAGTGATGA  
12-8 AGGATAACGATAACAATACACCTGCTGAGTGTACCTTCGATCA  
12-9 AGTTACTCGGATCATTTTCTCAAGTTCTCGACGAGTCCCTTCTA  
12-10 CTGTCAGCGTAGGCCAGCGACCTCCGGGCAGAAATCCTAAGGA  
12-11 TCAGCTCCACTTTTACCCTTCATCCTCCTGCTTGGTATCACG  
12-12 GGTCTTAACCCTTGGAGGAGGATGGGTAGGTTCTTCCGAT  
12-13 CAAGCCTTTTCATAGAGTTCTTGAATGGTAGGCGCGCTAAAGG  
12-14 CCTTCGTACGAGATTAAGCAGTGATAACTAAGATGGCGCAC  
12-15 TAGAATTGTCCACTGTTCTCAGCAACCCGCTTTTTTTTTTTT  
13-1 AGTATGTATGCCCTGTGACGGGCGTGGGGTTTTTTTTTTTTT  
13-2 TTCACCTCTGTGCGTACCTCTAGAACATATTAGGAGGTTACC  
13-3 TTAAGCTGCTGCGCAACGATCTATCTTACGTAGAGAACAGGA  
13-4 CCGTTAGATTTAGCTGGTTACCAAGACCGCGCACGAGTAGTT  
13-5 TCGTATAACCAGAGCATGATGACATGTGTTTGTCCTCAGCGGT  
13-6 GGCCACTATTACAGTGGGCTGTGGAATGATGTAGGGTGGCAG  
13-7 CTCTTCTCAACTCATCCACGTCAGGAAGATTACGCCACTCCT  
13-8 CACAATGTGTTTTGTATTCTGTTACACTCAGCATCATCACTGT  
13-9 CGGCACCCGAACGTACCAGTTTCGTGCGAGAACTTGATCGAAGG  
13-10 TGGGCCCTACCCTGCACTAAATCTGCCCGGAGTAGAAGGACT  
13-11 GTGATAGGGCGGATCCTGGTCAGCAGGAGGATTCCCTTAGGAT  
13-12 AAAGGCTACTTCTGAAGCCAGCCTACCCATCCCGTGATACCA  
13-13 AATCTTCTGTAGACGCCAGCGGCCTACCATTTCATCGGAGGAA  
13-14 GAAAGGAGGGTTGATGGCTTCTTAGTTATCACCTTTAGCGC  
13-15 TTTTTTTTTTCTAAAGAAATTCGGCAGGGTTGCGTGCGCCATC  
14-1 TTTTTTTTTTCCGTCACAGGGCTTCCGGGCACTAGTACGAATT  
14-2 ATACATACTAGAGGTACGCACAAGCTGTGAGATTTATAGGTA  
14-3 AGAGGTGAAGATCGTTGCGCACGATTCACTACAAGGTCATGT  
14-4 GCAGCTTAAGTAACCAGCTAAGTATGCCACTTCTCCACCGCA  
14-5 ATCTAACGGTCATCATGCTCTATCAATAACGGTAGTACTCTA  
14-6 GGTATACGACAGCCCACTGTACTCAGTTTAGGACACTTGCTC  
14-7 ATAGTGGCCACGTGGATGAGTCGGTCCGTTTCGCCCCGATATT  
14-8 TGAGAAGAGACAGAATACAAATACTAGCTTCTTGTTTAGTGC  
14-9 CACATTGTGAACTGGTACGTTACGGGCTCAGGATCTACACGC  
14-10 CGGGTGCCGTTTAGTGCAGGGTGCCATAAGGGAGGTTTAGGT  
14-11 TAGGGCCAGACCAGGATCCGCGCATACTGTGAAAGGAGAGG  
14-12 CCCTATCACCTGGCTTCAGAAAGAGCTGAGTTATCGTCCCTC

14-13 GTAGCCTTTTCGCTGGCGTCTATGGAGTGGATGGCCCTTTATT  
14-14 CAGAAGATTGAAGCCATCAACTGCTTCCCTCCAATCGTGGCT  
14-15 CCTCCTTTTCGAATTTCTTTAGGTTGTATTCCATTTTTTTTTTT  
15-1 GGATAGGGACAGGGCTAACTCAGTGCCCGAATTTTTTTTTTT  
15-2 GTCAACCTTGGCACGGCGACCTCTCACAGCTTAATTCGTACT  
15-3 CAGGTCCCTAATCTATGCCGGGTAGTGAATCGTACCTATAAAA  
15-4 TGGTTCACATTGGTTTAACTAAGTGGCATAACACATGACCTT  
15-5 GACGCGGCGTATGCGAGTCTCCGTTATTGATTGCGGTGGAG  
15-6 GGATCGACGGGCTCATAACTCCTAACTGAGTAGAGTACTA  
15-7 TCTCTGCAGGAATTCATAGATCGAACGGACCGGAGCAAGTGT  
15-8 ACGCCGAGCGAGGGTCGCTAAAGAAGCTAGTAAATATGCGGG  
15-9 AGGACCTCTGTCCCTCGAATTCCTGAGCCCGTGCCTAAACA  
15-10 CTTTGTAACTTATCTGTATTCCCTTATGGCAGCGTGTAGAT  
15-11 TCTCACCTTTTATCGTACGTGCACAGTATGCGACCTAAACCT  
15-12 CTCCAGTCTAGGTTACTAACCCTCAGCTCTCCTCTCCTTT  
15-13 TTGCCGTTGTGGGTTCCGTCACATCCACTCCAGAGGGACGAT  
15-14 AACATGGGATTCTAAGTTCCTGGAGGGAAGCAAATAAGAGGC  
15-15 TTTTTTTTTTAAATGCGGCCCTCTGGAATACAACAGCCACGATT  
16-1 TTTTTTTTTTGAGTTAGCCCTGCTCATGAGTCGATGACGAAAG  
16-2 TCCCTATCCGGTCGCGGTGCCGAGGACGAATAAAGTTAAGGA  
16-3 AAGGTTGACCCGGCATAGATTCCCTACACCTCTGTTGCAATT  
16-4 AGGGACCTGAGGTTAAACCAAAGCCAATGATGAATCCACTCC  
16-5 TGTGAACCAAGGACTCGCATAGTCGAGCGTGGTGGATCGCGC  
16-6 CGCCGCGTCAGTTATGAGGCCATTTCTGAGATAGTCCCTATA  
16-7 CGTCGATCCATCTATGAATTCTCATGAATTGTTATCGAAAAGC  
16-8 CTGCAGAGATTAGCGACCTCCTCAGCGTCCAACGTTATGTA  
16-9 GCTCGGCGTAATTCGAGGGACCCATAATAACAAAGAGATGCA  
16-10 AGAGGTCCTAATACAGATAAGGACTTAATTCGTGGAACGTCG  
16-11 TTAACAAAGCACGTACGATAATTTCCGATCCCTCGGCATGCG  
16-12 AGGGTGAGAGGTTAGTAACCTTCGAGGCACACATTTGACCGA  
16-13 AGACTGGAGTGACGGAACCCAGTCATTTACCGAGTAAACAGC  
16-14 CAACGGCAAAGGAACTTAGAAGGCGACTAGAGGCCCTGGATC  
16-15 TCCCATGTTGAGGGCCGATTGAATCTATTAATTTTTTTTTTT  
17-1 AAGACTTCCGGGCTTGACATCCGACTCATGAGTTTTTTTTTTT  
17-2 GAGTTGCCTGCGTAAACTGGTTATTTCGTCCTCCTTTCGTCAT  
17-3 GGCTGCTTCAAGGCGGGCGTCAGAGGTGTAGGTCCCTTAACTT  
17-4 AACCTCATCGTTTCGCGACCTCCATCATTTGGCTAATTCGGAAC  
17-5 GTCCAGAATGCTCTATAGGCTCCACGCTCGACGGAGTGGATT  
17-6 GACCACGTGGGCCATCGTCGGATCTCAGAAAATGCGCGATCCA  
17-7 ACTACCTCCAAATTATTTATAACAATTCATGATATAGGGACT  
17-8 CCACATTCCTTTAATATGTGTGGACGCTGAGGCTTTCGATA  
17-9 CCCTGCGGGTCGATAATGAGTTGTTATTATGGTACATAACGT

17-10 CCTGTGGGCTCTTAATGCAAACGAATTAAGTCTGCATCTCTT  
17-11 TTGTTAATAGACCACCAGCACGGGATCGGAAACGACGTTCCA  
17-12 ACTGCCAAACGCACTCGAGCAGTGTGCCTCGACGCATGCCGA  
17-13 TTATTCAGGCCAGGATCAGGTCGGTAAATGACTCGGTCAAAT  
17-14 CCGAGTGTGCCTGCAGCACAACTCTAGTCGCCGCTGTTTACT  
17-15 TTTTTTTTTTACAGATATGTCTTAATAGATTCGATCCAGGGC  
18-1 TTTTTTTTTTGATGTCAAGCCCTCCAAAGCCTGTGATCGTTCA  
18-2 GGAAGTCTTACCAGTTTACGCTAAATAGCTGCTACTCCATTA  
18-3 AGGCAACTCGACGCCCGCCTTTCTATGCATGAACTACATTT  
18-4 GAAGCAGCCGAGGTTCGGAACATGAAAGAATTGGTATAACCG  
18-5 GATGAGGTTAGCCTATAGAGCACCCCTGAGAGTCTATGTCGGG  
18-6 ATTCTGGACCCGACGATGGCCACTGCGTTGTATGGGTATTGA  
18-7 CACGTGGTCTATAAATAATTTAAGAACTATTTAAACCCGGAA  
18-8 GGAGGTAGTCACATATTAAGAGAGAACTGCACCTCTAAAGC  
18-9 GGAATGTGGACTCATTATCGAGAGAGCCTCCGGGTAACCTCT  
18-10 CCCGCAGGGTTTGCATTAAGAACGGGCTCGTTCCCATCCGGG  
18-11 GCCCACAGGGTGTGGTGGTCATCGCCGGATGACTAGTTGGT  
18-12 TATTAACAATGCTCGAGTGCATATATCGACCTGAGAAATAGTA  
18-13 TTTGGCAGTACCTGATCCTGGGTGCCAAGTTCTTAGATGAGT  
18-14 CCTGAATAATTGTGCTGCAGGTTACCAGATTGTATCTCTTAG  
18-15 CACACTCGGGACATATCTGTGGTAGTATGACATTTTTTTTTT  
19-1 GGATGACCCGAGAGACGTACGCAGGCTTTGGATTTTTTTTTT  
19-2 GTTAAATTTCTTGACACTCGAGCAGCTATTTATGAACGATCA  
19-3 GAGCTAATTACAGGGTCGGAATCATGCATAGATAATGGAGTA  
19-4 GGTTCGAGTCGTAGCATAATCGAATTCCTTCATAAATGTAGTT  
19-5 TTCCAGTCGTGTCTACTTCTACTCTCAGGGTCGGTTATACC  
19-6 GCGGTCCAAAGAGGGTGC GCGTACAACGCAGTCCCGACATAG  
19-7 ATTGATCTGAGCCCGACGACTAAATAGTTCTTTCAATACCCA  
19-8 AAACCGGCGAATTGATCACTATGCAGTTCTCTTTCCGGGTTT  
19-9 TTGGGCAGCGCTTTAATAGTGC GGAGGCTCTCGCTTTAGAGG  
19-10 AAGGATTTACAGTATGTTATAAACGAGCCGTAGAGGTTACC  
19-11 AGACGAATGTGTGTAATAAGCCATCCGGCGATCCCGGATGGG  
19-12 GCTGGGTATACAACTGCCTCAAGGTCGATATAACCAACTAGT  
19-13 GCACCTCTCCAAACACCGGCAGAACTTGGCACTACTATTCTC  
19-14 TAGTCACTAAGCGTTTCGATTTCAATCTGGTAAACTCATCTAG  
19-15 TTTTTTTTTTATACTTCAATTGTGTCATACTACCTAAGAGATA  
20-1 TTTTTTTTTTCGTACGTCTCTCACATCTTGACTCTGGATCTTT  
20-2 GGGTCATCCTCGAGTGTCAAGACGAATTAAGAGATATTTATA  
20-3 AAATTTAACTTCCGACCCTGTATCCGGGCGATCACCAGGTG  
20-4 AATTAGCTCCGATTATGCTACCTAGACGGTTTAGTAGAGTGG  
20-5 GACTCGACCAGGAAGTAGACAGTAGCATTACACCGATTCTAC  
20-6 CGACTGGAACGCGCACCCCTCTTCGGTGAACGAGGCACACTAT

20-7 TTGGACCGCAGTCGTCGGGCTCCCTCAGAAGAAAATAAAATAAA  
20-8 CAGATCAATTAGTGATCAATTGTCCGCCGAAACACCGGATGC  
20-9 CGCCGGTTTTCACTATTAAAGCCTGGGCTTCCACGAGAAGAGG  
20-10 GCTGCCCAATATAACATACTGGAGGCTCCGCCACCCTTTAAT  
20-11 TAAATCCTTGCTTATTACACAAGTGAAAGGGAGAAGGTCCCA  
20-12 CATTTCGTCTTGAGGCAGTTGTTTATGCGTTTCCAGTCCATAA  
20-13 ATACCCAGCTGCCGGTGTGTTGCGCCGTAATATTACGAAGCAC  
20-14 GAGAGGTGCAAATCGAACGCTTGGGAACATCATTAACACTAA  
20-15 TAGTGACTACAATTGAAGTATGTTTCAAGTTTTTTTTTTTTTT  
21-1 CATTGTGCTTATAAAGCTAGAAGTCAAGATGTTTTTTTTTTTT  
21-2 ACTAAGACAATAAGGAATCTATCTTAATTCGTAAAGATCCAG  
21-3 CGTACCCAAACTCAGAGAGGTATCGCCCGGATTATAAATATC  
21-4 ACCATGAAGTAGAATGGTCAGAAACCGTCTAGCACCTGGGTG  
21-5 ACTCCCTATGGCGGGCCTCTGTGTAATGCTACCCACTCTACT  
21-6 CAGTAGCAGTTCTCGTAATTATCGTTCACCGAGTAGAATCGG  
21-7 ACACAAGGGTCGCCGGCGTGGTCTTCTGAGGGATAGTGTGCC  
21-8 AACCCGGTCAACCAGACTAACTTTCGGCCGACTTTATTTATTT  
21-9 ACACCACCTTAGAACAACGGTGGAAAGCCCAGGCATCCGGTG  
21-10 CGACTTCCCTTATTTAGAAATGGCGGAGCCTCCCTCTTCTCG  
21-11 TAATAGAAAGGATTAACGGTCTCCCTTTCCTACTATTAAAGGGT  
21-12 ACCCACGTCCGATTGTGGTCTGAAACGCATAATGGGACCTTC  
21-13 TGGGCGGAGATAGTCGCCAGTATATTACGGCGTTATGGACTG  
21-14 TTAGCTGGGAGCGGCCAGCGCTGATGTTCCAGTGCTTCGTA  
21-15 TTTTTTTTTTGCCTATTAGATGAAACTTGAAACTTAGTGTTAA  
22-1 TTTTTTTTTTCTAGCTTTATAAAGTTGCACCGACGAAACGAC  
22-2 ACGACAATGTAGATTCCCTTATAAGAAGTCTCTCGCTTCTGGT  
22-3 TGTCTTAGTACCTCTCTGAGTGTCAATTGTATGTTGACATGC  
22-4 TTGGGTACGCTGACCATTCTAGAAAATCTTCTGAAGACACATC  
22-5 CTTTCATGGTCAGAGGCCCGCCAGCAGAATCATCCAGTTAAC  
22-6 ATAGGGAGTTAATTACGAGAACGCCAGCCTGCTGGCTGGTCC  
22-7 CTGCTACTGCCACGCCGGCGACTATATACGCAGGTCGCTTGT  
22-8 CCCTTGTGTGTTAGTCTGGTTTCATGAAGCTGTAGACTAGGT  
22-9 GACCGGGTTCCGTTGTTCTAACCTGTTTCATAAGTGCTAAA  
22-10 GGGTGGTGTATTTCTAAATAATACTCCCGCTATAATAATGAC  
22-11 GGAAGTCGGACCGTTAATCCAGCGAGAAAAGATTACCCCTTA  
22-12 TTTCTATTAAGACCACAATCGGGCACAGCCGTAACCTTGGTA  
22-13 GACGTGGGTACTGGCGACTATACTAGACGGCCCTCATCCGAC  
22-14 CTCCGCCAGCGCTGGCCGCTCGTACGCTTATACAGGACTCT  
22-15 CCCAGCTAACATCTAATAGGCAGATAACCAATTTTTTTTTTTT  
23-1 TGCATGTACTTGTGTCGCGCAACGGTGCAACTTTTTTTTTTTTT  
23-2 CAGAGCATGCGAAGTTATTCCAGAGACTTCTTGTGCTTTCGT  
23-3 CATTGCGGTGGGCGTGCACACATACAATTGACACCAGAAGCG

23-4 CCCTATTTAGCCAACAATTCTCAGAAGATTTTCGCATGTCAAC  
23-5 GCCTACGAAGTTACTCCTAGGTGATTCTGCTGGATGTGTCTT  
23-6 GGATGAGTCCAAATCTGGTGGGCAGGCTGGCGGTTAACTGGA  
23-7 TTTGGCTGTCTAGAAGAATGATGCGTATATAGGGACCAGCCA  
23-8 CCCTTTCCACTTAAGCGTAAACAGCTTCATGAACAAGCGACC  
23-9 TGTTCCCTACTCTTATCGCGTATGGAAACAGGACCTAGTCTA  
23-10 ACAGGCTCATCGTTCAAGGCTTAGCGGGAGTATTTAGCACTT  
23-11 TCGGTGAATTGACCGATAGTACTTTCTCGCTGGTCATTATTA  
23-12 AGAAGCACGATTGGTTCTCCAACGGCTGTGCCTAAGGGTAAT  
23-13 TGCCGGGCATAGGAGATAATAGGCCGTCTAGTTACCAAGGTT  
23-14 GTTTCACGCGTGGATTGCCGTATAAGCGTACGGTCGGATGAG  
23-15 TTTTTTTTTTATGCACTGTATTATTGGTTATCTAGAGTCCGTG  
24-1 TTTTTTTTTTTGCGCCAGCAACCGACTACACACTGCGTGGTA  
24-2 GTACATGCAGGAATAACTTCGGTCCAAAGGATAGTAGCTACT  
24-3 CATGCTCTGGTGTGCACGCCCATTAGGGCTTCAAACCGTTCA  
24-4 ACCGCAATGAGAATTGTTGGCGTTTTCGTTTTACGCGTGACGAA  
24-5 TAAATAGGGCCTAGGAGTAACGTCCGCTACTTCCGTGCAGTT  
24-6 TTTCGTAGGCCACCAGATTTGCGGGAGTGATTCTCGACCATC  
24-7 GACTCATCCTCATTCTTCTAGCACGATTTAGGACTTGTCCTT  
24-8 ACAGCCAAATTTACGCTTAAGTATAGGTTTAAAAGGTAGAAAT  
24-9 TGGAAAGGGACCGGATAAGAGGACAGCTAAGACCCATCAGTG  
24-10 TAGGGAACAAGCCTTGAACGATGAGGGCAGCAGAGAACCCGT  
24-11 TGAGCCTGTTACTATCGGTCAGAATTGAAAGTAGACCGTCAT  
24-12 ATTCACCGATGGAGAACCAATACACCAGGTAGGTCCACAATC  
24-13 CGTGCTTCTTATTATCTCCTATTCTGGCGAATCTCTTGGATG  
24-14 TGCCCCGCAACGGCAATCCACCTAGTTTCATCGTGAATAGCGG  
24-15 GCGTGAAACAATACAGTGCATCGTAATTTCTATTTTTTTTTTT  
25-1 TGTGTAGTCGGTTTTTTTTTTTT  
25-2 ATCCTTTGGACTACCACGCAG  
25-3 GAAGCCCTAATAGTAGCTACT  
25-4 GTAAACGAACTGAACGGTTT  
25-5 AAGTAGCGGACTTCGTCACGC  
25-6 AATCACTCCCGAACTGCACGG  
25-7 CCTAAATCGTGGATGGTCGAG  
25-8 TTAAACCTATAAGGGACAAGT  
25-9 TCTTAGCTGTCATTTCTACCT  
25-10 TGCTGCCCTCACACTGATGGG  
25-11 ACTTTCAATTCACGGTTCTC  
25-12 CTACCTGGTGTATGACGGTCT  
25-13 ATTCGCCAGAAGATTGTGGAC  
25-14 CGATGAACTAGCATCCAAGAG  
25-15 TAGAAATTACGCCGCTATTCA

Motif 3.2 (24H×29T)

| Name | Sequence                                     |
|------|----------------------------------------------|
| 1-1  | GTGGTATTTCTACTTCAATAC                        |
| 1-2  | TTCAAGCATCATCGCAAATCC                        |
| 1-3  | GGAAGTGGCTGGACTACTGCT                        |
| 1-4  | CGCCGGGCTATATCTCTACTG                        |
| 1-5  | ATAAGCTAAACAAAGTCAAGG                        |
| 1-6  | TATGGCGACCTTGGGACGTAG                        |
| 1-7  | GGTGAATCACTGTTTCAGGAAT                       |
| 1-8  | ACCTAAACCCTGGGCCGGGTT                        |
| 1-9  | CGCTCGACCCTCGACAAGTCT                        |
| 1-10 | GCTTAACAACCTCGAATTCATA                       |
| 1-11 | CCTCAAAGGATTACAAGCTTC                        |
| 1-12 | ATCCAATCTCAGGCGCCTTTC                        |
| 1-13 | GACCAGCCTATAGCATTCGAT                        |
| 1-14 | CGTACATCACGAGGATTCAGC                        |
| 1-15 | TTTTTTTTTTTTTGATGCTTTCG                      |
| 2-1  | TTTTTTTTTTTTGTATTGAAGTAATCGGTAAGGTGTCCAAGGAC |
| 2-2  | GAAATACCACGGATTTGCGATCAGCTTAATCCTTGGAGGCAC   |
| 2-3  | GATGCTTGAAAGCAGTAGTCCGCCAGACATCGGCTGGACGGG   |
| 2-4  | AGCCAGTTCCCAGTAGAGATACTCGTCCAAAGGACAGGTGCT   |
| 2-5  | TAGCCCGGCGCCTTGACTTTGGTGGCCTCCAGCTAAATTTCTG  |
| 2-6  | TTTAGCTTATCTACGTCCCAATTTAGGGCAAGTCAAGCTCCG   |
| 2-7  | GGTCGCCATAATTCTGAACAGCCTGCCACGTAAACTTTAGG    |
| 2-8  | GTGATTACCAACCCGGCCAGATGGATGTATTGATTACGTG     |
| 2-9  | GGGTTTAGGTAGACTTGTGCGACCCAAGCAGGCGTCGAGCATA  |
| 2-10 | GGGTCGAGCGTATGAATTCGATGGCGATTAGCAAATTTGGGCG  |
| 2-11 | GTTGTTAAGCGAAGCTTGTAAACGTAAACCATCGGGCATACTG  |
| 2-12 | TCCTTTGAGGGAAAGGCGCCTAGATGAGCTAGCCTTCACGGC   |
| 2-13 | GAGATTGGATATCGAATGCTAAGGCTCGATCTTGTTCGTAGA   |
| 2-14 | TAGGCTGGTCGCTGAATCCTCGTGTCTTCGTGTGGGATGCCG   |
| 2-15 | GTGATGTACGCGAAAGCATCAACTGTAGTGGCTTTTTTTTTTT  |
| 3-1  | TTACACGCGTCTCTTGATAATACCTTACCGATTTTTTTTTTTT  |
| 3-2  | AGGTACTTGGCCCAATATGCTGGATTAAGCTGGTCCTTGGAC   |
| 3-3  | AAAGGAGGTGAACTCTTTCGTGATGTCTGGCGTGCCCTCAA    |
| 3-4  | AGAGAGCCCAGGCTTTAGCATCTTTGGACGAGCCCGTCCAGC   |
| 3-5  | TTAACGGGTGAGATCCTGGGCCTGGAGGCCACAGCACCTGTC   |
| 3-6  | CCGACCAAGCTGAGGCATCAGCTTGCCCTAAACAGAATTTAG   |
| 3-7  | TTCAAACCGATGTCCGAACAGACGTGGCAGGCCGGAGCTTGA   |
| 3-8  | GTTGAGCTGATATTGTGCGAGATACATCCATCCCTAAAGTTT   |
| 3-9  | GTAAATGCGAATATTTGCGGCGCCTGCTTGGGCACGTAATCA   |

3-10 ACTCGTAGCGCTGGAGCATGGGCTAATCGCCATATGCTCGAC  
3-11 TGTAGCGCCACGGCCGGTTTAGATGGTTAACGCGCCCAATTT  
3-12 GAAGCTTGCACCTAAACCTCAACTAGCTCATCTCAGTATGCC  
3-13 CTGCATCCGCAACCTCCGGCAAGATCGAGCTGCCGTGAAGG  
3-14 AATATGTCAGTACCAGGTCCTCACGAAGACACTCTACGAACA  
3-15 TTTTTTTTTTCAATCATAACTGCCACTACAGTCGGCATCCCA  
4-1 TTTTTTTTTTATTATCAAGAGATGAGAATCAGGAGGTTCTGG  
4-2 ACGCGTGTAAGCATATTGGGAACTCACTCCGTCCTCCGCTGT  
4-3 CCAAGTACCTACGAAAGAGTTCAAAGTCTTAGCCTTCTGGTG  
4-4 CACCTCCTTTATGCTAAAGCCAATFGCCCTCGGCCCTCTCGTA  
4-5 TGGGCTCTCTGCCAGGATCTTGTAACCTAACGACAGCAGAC  
4-6 GACCCGTTAACTGATGCCTCACTATCCTCTATTTGGTTAAAG  
4-7 GCTTGGTCGGCTGTTCCGGACAGACTCGGTCGGCAAATTTCTT  
4-8 TCGGTTTGAAGCTCGCACAATATCCTTTTACACTGGGCAGGAA  
4-9 TCAGCTCAACGCCGCAAATATGTGACATCGGATTACAGATCA  
4-10 TCGCATTTACCCATGCTCCAGACACTAATTTGGAGAAACTTTA  
4-11 CGCTACGAGTTAAACCGGCCGCTTGGAACGCATAGAGAGAT  
4-12 TGGCGCTACATTGAGGTTTAGAGTCCAAGACGCCCTAGAGGT  
4-13 TGCAAGCTTCTGCCGGAGGTTTACGTGACAAAGACTAAAGG  
4-14 GCGGATGCAGAGGACCTGGTAAACCGAGTGCCTCGCATGGA  
4-15 CTGACATATTAGTTATGATTGGCGATAATGTCTTTTTTTTTT  
5-1 CCTGTAACCTTTAAAGCTACGGCTGATTCTCATTTTTTTTTTT  
5-2 TGGGCCTGCCGACGATTTAGCCGGAGTGAGTTCAGAACCCTC  
5-3 GGCTCATGCCAGAACTCTGCCCTAAGACTTTGACAGCGGAGA  
5-4 CAGCATCTCCATACCGTATGCCGAGGGCAATTCACCAGAAGG  
5-5 TGTGAATAAGCGCGTGGAGTCGTTAGGTTACATACGAGAGGC  
5-6 GTGACCTGGAATTATCAGCGTATAGAGGATAGGTCCTGCTGTC  
5-7 TCCATGCAATCTATTATAGCCCCGACCGAGTCTTTAACC  
5-8 CAGTCCCAGCGAGCACACTTGGTGTGAAAGGAAAGAAATTTG  
5-9 ATTTGTCTTACTAAGAGGCTATCCGATGTCACTTCCTGCCCA  
5-10 GGTACGGTATCGAATTCCTTCCAATTAGTGTGATCTGTAA  
5-11 CGTACTTTCTGGCGAAAGACTGCGTTCCAAGGTAAAGTTTCT  
5-12 CTCCGTTGCTTTTCGTATGATTTCGTCTTGGACTATCTCTCTAT  
5-13 ATATTCGACCTCACCGATTGCTTGTACGTGAACCTCTAGGG  
5-14 CTACAGGCCTCAGGCTTCGGCTGCACTCGGTTCTTTAGTCT  
5-15 TTTTTTTTTTGAACCGCTGCGACATTATCGCTCCATGCGAG  
6-1 TTTTTTTTTTCCGTAGCTTTATTATCGCGTTGCGGGCACCC  
6-2 AAGTTACAGGGCTAAATCGTCCTGGCCAATGCAGTTACAAGT  
6-3 GGCAGGCCCAGGCAGAGTTCTGTGGGACGGCCAACGTCCGCT  
6-4 GGCATGAGCCGCATACGGTATACCAAGGTATTGCCAAAGGGT  
6-5 GGAGATGCTGGACTCCACGCGACCCCTAGACAACTCTATACCC  
6-6 CTTATTACACAACGCTGATAATTGTGGGATTCGATACCCAAGC

6-7 TCCAGGTCACGCTATGAATAGTCTAGTCCATAGGGCCCGGGT  
6-8 ATTGTCATGGACAAGTGTGCTCGGGAGAGGCACAGTCAGCGAT  
6-9 GCTGGGACTGTAGCCTCTTAGGATCAGTGTAAAGTTCGCCGAT  
6-10 TAAGACAAATAAGGAATTCGACATCGTACTACCCGTTTCAGGG  
6-11 TACCGTGACCAGTCTTTTCGCCCACCGCTCGTCTCCCGAAACA  
6-12 AGAAAGTACGAATCATAACGAATTTATGACATCCATAACGGTT  
6-13 AGCAACGGGAGGCAATCGGTGAACCACATTTTCGCTGCGCTAAC  
6-14 GGTGCAATATGCCGAAGCCTGGCATGGTGTGAGCTGAATAGC  
6-15 AGGCCTGTAGGCAGCGGTTGCACACCCCTCGATTTTTTTTTTTT  
7-1 CGGTATTTAGCCCGGAGTAGACAACGCGATAATTTTTTTTTTT  
7-2 CACGGCGTAGGGCTAACTGTTGCATTGGCCAGAGGGTGCCCC  
7-3 GTTCGTGTTATGTGTGGAACAGGCCGTCCACACTTGTAACT  
7-4 TGTCCAGCTCCTTTAATGTGAAATACCTTGGTAGCGGACGTT  
7-5 GCGGGAGTTGCGCTAGAGAATTTGTCTAGGGTACCCTTTGGC  
7-6 CCGCGGGCTATTCCCTTCTACGAATCCCACAGGGTATAGAG  
7-7 GCGGTGAGCCCTGCGTCTGATATGGACTAGAGCTTGGGTAT  
7-8 CATCCCATTATTCTTGCACAGGTGCCTCTCCCACCCGGGCC  
7-9 TGTGATCCAACAACCGAACCGTTACACTGATCATCGCTGACT  
7-10 ACTGAACTACCCTCGTAATGCGTAGTACGATGATCGGCGAAC  
7-11 TTCCCCTCCGTTAGGCCTTCGACGAGCGGTGCCCTGAACGG  
7-12 AGGACGTACTGGCGTTCTGCAGATGTCATAAATGTTTCGGGA  
7-13 TGTTTTAGAGCATACATCCGTACGAAATGTGGTAACCGTTATG  
7-14 TAGTGGTGAACAGCGAGGCTTCACACCATGCGTTAGCGCAG  
7-15 TTTTTTTTTTTTATACAATAGACATCGAGGGTGTGCTATTCAGC  
8-1 TTTTTTTTTTTTCTACTCCGGGAGCACCACGAGTGATGCGGCC  
8-2 CTAAATACCGAACAGTTAGCCCTTATCAACGATCTCAGCCGT  
8-3 CTACGCCGTGTGTTCCACACAGTTGTCTCGATTTAATGATG  
8-4 TAACACGAACTCACATTAAAGAATAGCGGTATCCTGCTCGTA  
8-5 GAGCTGGACAATTCTCTAGCGAACGCATGCACAGCTGCGCAG  
8-6 CAACTCCCGCTAGGAAGGGAAATATCCTCTGTTATTCGAGA  
8-7 TAGCCCGCGGTCAGACGCAGGCACTAAATTAGAATTTCTTAA  
8-8 GCTCGACCGCCTGTGCAAGAAAGGGTGCCTAGTACAAAGCT  
8-9 TAATGGGATGCGGTTTCGGTTGGCTGAGTTTGGAAAGGACCACA  
8-10 TTGGATCACAGCATTACGAGGTTCCCAAGGGACCCGACTTAT  
8-11 GTAGTTTCAGTGAAGGCCTAACTTAGAGGAGAGACCACACTCC  
8-12 GGAGTGGGAATGCAGAACGCCTAGTGGCCCGCAACTCTCTGG  
8-13 AGTACGTCTTACGGATGTATCTGCTAATTTGTTTGGAAAGGC  
8-14 GCTCTAAACAAGCCTCGCTGTGGTAATCACATCAATCTTCAC  
8-15 TTCACCACTAGTCTATTGTATCGCGGGACAACTTTTTTTTTTT  
9-1 AGCCGTCTCGATCGTTTTGTACCTCGTGGTGTCTTTTTTTTTTT  
9-2 TTACCTACCATGTGGATTCCATCGTTGATAAGGGCCGCATCA  
9-3 GTTGCGTTGGTGGTGTCTCTATCGAGGACAACACGGCTGAGA

9-4 AATGTTTAAATCCTGCCACACATACCGCTATTCATCATTTAAA  
9-5 CTCACCCCTTATTCGTAGCTCCGTGCATGCGTTTACGAGCAGG  
9-6 GTTCATGTTTACCGACGCGGCACAGAGGATATCTGCGCAGCT  
9-7 CGCTTAAGTACGAGCAACCCACTAATTTAGTGTCTCAGAATA  
9-8 TTTGCAGCTATAAGTTTCACTAGGCAACCCCTTTAGGAAATTT  
9-9 CTATACTATCCGACTGGTACACCAAACCTCAGCAGCTTTGTAC  
9-10 AAGCTAGGTCAGTTCTGTTGGTCCCTTGGGAATGTGGTCCTT  
9-11 CGTAGAATGGGTAAAGCCTTGCTCTCCTCTAAATAAGTCGGG  
9-12 GAGTGTATCCCTGCTTCCAATGCGGGCCACTAGGAGTGTGGT  
9-13 GGCAGAATCATATGTTTCCGAACAATTAGCAGCCAGAGAGTT  
9-14 CGCATCTGTGAGGCTGAATGCATGTGATTACCGCCTTTCCAA  
9-15 TTTTTTTTTTTCGAGGTGGGAGTTGTCCCGCGGTGAAGATTG  
10-1 TTTTTTTTTTGTACAAACGATCGGCCTGGATCCAGCACGCTT  
10-2 CGAGACGGCTTGGAAATCCACAAGTGAGTGACGCTCTTGATTC  
10-3 TGGTAGGTAATAGAGACACCATATATATAACTTACGGACTAG  
10-4 CCAACGCAACGTGTGGCAGGATCTAGCACTTCCCAAATTCAG  
10-5 TTTAAACATTGGAGCTACGAAACACATTTGTTCCATAATAGCA  
10-6 TAAGGGTGAGGCCGCGTCCGGTGGGACTAAAAGACCGTCTGATG  
10-7 GAACATGAACTGGGTTGCTCGACGCTGGTTACAATTTATCGGT  
10-8 TACTTAAAGCGGTGTGAACTTAGATGCCAGGCCGGGCGTGCA  
10-9 TAGCTGCAAATGTACCAGTCGCGCTGGAAGTCCAAAGTTTAT  
10-10 GATAGTATAGCCAACAGAACTTGAGCGGATTTGACATAAATG  
10-11 GACCTAGCTTCAAGGCTTTACGCGGCGCTGGCAATGTCGGGC  
10-12 CCATTCTACGATTGGAAGCAGGGCGGTTGTGCCGTACTATAT  
10-13 GGATACACTCTCGGAAACATACGCAGCGAGACCATACTACTCA  
10-14 TGATTCTGCCGCAATTCAGCCTAGCCTTAGTTAGCTCTAGTTG  
10-15 CACAGATGCGTCCCACCTGCGGCTAGGCCCTGTTTTTTTTTT  
11-1 AGCATATGCCCTCGTGGGTTAGATCCAGGCCGTTTTTTTTTTT  
11-2 GGATAGCTCTGCGTGTGAGACGTCCTCACTAAGCGTGCTG  
11-3 GCGGGACTGCGTGGAGACTTAAGTTATATATAGAATCAAGAG  
11-4 GAAACGTGGGCATGAGGGTGAGAAGTGCTAGACTAGTCCGTA  
11-5 CTGTCTACCGAACCCAAGGTTGAACAATGTGTCTGAATTTGG  
11-6 GTGCCGGAATTGGATTATAGCTCTTTAGTCCCTGCTATTATG  
11-7 TGAGCTCAGACGGCAATCCAGGTAACCAGCGTCATCAGACGG  
11-8 TATCCAATACACGTCAACCTAGCCTGGGCATCACCGATAATT  
11-9 GGACTGGTCCGACAACGGGCGGACTTCCAGCGTGCACGCCCG  
11-10 GTACGCCCTTACGCGTTACGTAAATCCGCTCAATAAACTTTG  
11-11 GCGACCGACCCGTCATGTTGCCAGCGCCGCAATTTATGTC  
11-12 TATGTCCCGAACTTACAGAGATGCACAACCGCCGCCCCGACATT  
11-13 AGGCATACTCCCGCAAACCTTCGTCTCGCTGCGATATAGTACG  
11-14 CTCAACGATTAGAGTGCAAGTTAACTAAGGCTTGAGTGTATG  
11-15 TTTTTTTTTTAAACGGAATGCTCAGGGCCTAGCCAACCTAGAGC

12-1 TTTTTTTTTTTTAAACCCACGAGAAGCGCAAACAATAGTGGATG  
12-2 GGCATATGCTTCTCGACACGCTTTACGACCTTTACGGTAGGA  
12-3 AGAGCTATCCTAAGTCTCCACACGGTAGCATCGGCGGCATCT  
12-4 GCAGTCCCGCTCACCTCATGCACTAACGACGAGTGTAGAT  
12-5 CCCACGTTTCAACCTTGGGTTTACTGAGCTTGCGAATCCGAA  
12-6 CGGTAGACAGGCTATAATCCAGGCTGGAGGACGGCGTACGAA  
12-7 ATTCCGGCACCTGGATTGCCGGCACCACCATCACCACAAGGT  
12-8 TCTGAGCTCATAGGTTGACGTAGCATGGTCCGGCATTTACGC  
12-9 GTATTGGATACGCCCGTTGTCCAAAGCAAAGTTTGAAAGGGT  
12-10 GGACCAGTCCACGTAACGCTGTAGAGCCAACGATTCGTGACG  
12-11 AAGGGCGTACAACATGGGACGGTGAAGCTCCTTAAGCAACTA  
12-12 GGTCCGGTCGCATCTCTGAAGTAAGAAACTTATTACCAGCGTT  
12-13 TCGGGACATAGAAGTTTGC GGAAACGGCTAGGTTACTAAGTT  
12-14 GAGTATGCCTACTTGC ACTCTCCAGAAAAGACGCCCTCGTATC  
12-15 AATCGTTGAGAGCATTCCGTTGCCAGGTATCATTTTTTTTTTT  
13-1 ATGTGGCACCGAGGCCCTCCATGTTTGC GCTTTTTTTTTTTTT  
13-2 TCAGCCACTCGGATTAGAAATAAGGTCGTAAACATCCACTAT  
13-3 ACGTATGCGCCGTAGTCCACGGATGCTACCGTTCC TACC GTA  
13-4 TCGCAATGGTCTCCATTTAGTCGTCTAGTGAGATGCCGCC  
13-5 ACGTTTATATTTTC GACTGGAGCAAGCTCAGTAATCTAACACT  
13-6 GCCTCTGTTGTTTCGTTATAATGTCC TCCAGCCTTCGGATTCG  
13-7 CTGGGCAGCGGAGTGCGACACGATGGTGGTGCTTCGTACGCC  
13-8 CGACAACAACGAGCGTAGACTCGGACCATGCTACCTTGTGGT  
13-9 CCTACAAGGTACATATATAATACTTTGCTTTGGCGTAAATGC  
13-10 TATTATGAGTATTGGAAAGCTCGTTGGCTCTAAC CCTTTCAA  
13-11 CAGGATCCATATAGGGAGGAAAAGGAGCTTCACCGTCACGAAT  
13-12 CTGTAGTAGGGCCTGGGCGGTATAAGTTTCTTTAGTTGCTTA  
13-13 TAGAGTGCTGTAAGTCAACACCCTAGCCGTTTAACGCTGGTA  
13-14 CGAGCCAGATAATACATAAGGGTCTTCTGGGAACTTAGTAA  
13-15 TTTTTTTTTTTTCCAACCCAAAGTGATACCTGGCGATACGAGGC  
14-1 TTTTTTTTTTTTGGAGGGCCTCAA ACTACAGGAACTAAGCATG  
14-2 GGTGCCACATATTTCTAATCCGACCGGAAATCAGGTCCCGGT  
14-3 GAGTGGCTGACGTGGACTACGAGGCAAATTAACACTCTCCGT  
14-4 GCGCATACGTACTAAATGGAGGAATCTGATACCCACGGGACA  
14-5 ACCATTGCGACTCCAGTCTGAAGGTAAACGGGAGTTATCGCCG  
14-6 ATATAAACGTATTATAACGAAGCATTCAATAGGTCATGCGGC  
14-7 CAACAGAGGGCGTGTGCACTCATTGGCTATTGTCCACTCGTT  
14-8 CGCTGCCCAGAGTCTACGCTCCTTCAGCAGAGTTAACGGTTG  
14-9 GTTGTGTGTCGATTATATATGTATATTGAGTCACGTGCTAAGC  
14-10 ACCTTG TAGGAGCTTTCCAATACGTCAGTGCCAAACCGGTCT  
14-11 ACTCATAATATTCCTCCCTATGTGAGACTTTCAGTTAATACG  
14-12 ATGGATCCTGACCGCCCAGGCGGCTACGTTTAATGTTAGAG

14-13 CCTACTACAGGTGTTGACTTAGTGAGCTCCGATCGGACGCAG  
14-14 CAGCACTCTACCTTATGTATTTGCTGCAGCTAACACGTACAG  
14-15 ATCTGGCTCGCTTTGGGTTGGGCCATGGTGGGTTTTTTTTTTT  
15-1 CAACTCCATTGGTTCATCTGATCCTGTAGTTTTTTTTTTTTT  
15-2 TACCGGATCTCGCCATGCGGTGATTTCCGGTCCATGCTTAGT  
15-3 ACTAGTCCCTCCTGTCTCCAGTTAATTTGCCTACCGGGACCT  
15-4 CACCTAAGAGCCTGGACGGTAGTATCAGATTCACGGAGAGTG  
15-5 CCAGGTAATAAATTGCGTAGTTCCCGTTTACCTGTCCCGTGG  
15-6 CGAGAGCGAGAGCCGCAAAGGCTATTGAATGCCGGCGATAAC  
15-7 TTATATATCCTACCAGGCTCACAATAGCCAATGCCGCATGAC  
15-8 GGCAATTACCGTGATCGCCCTCTCTGCTGAAGAACGAGTGA  
15-9 AGGCAGGCTTCTAAGTACTATTGACTCAATATCAACCGTTAA  
15-10 GAACTCTTGGGAAGTCTGACCGGCACTGACGTGCTTAGCACG  
15-11 GCGTTACACGGAGTCGAGCGAGAAAAGTCTCACAGACCGGTTT  
15-12 TGGACAAACACCGACTTAGAGAAAACGTAGGCCCGTATTAAC  
15-13 TTCTGGCGCTAGGATATGTCATCGGAGCTCACCTCTAACATT  
15-14 GCCCTGGCGCGAAAGAAGTAATAGCTGCAGCACTGCGTCCGA  
15-15 TTTTTTTTTTTAAGGCCTTGACCCACCATGGCCTGTACGTGT  
16-1 TTTTTTTTTTTTCAGATGAACCATTTTCGCATCGTATATATGAG  
16-2 AATGGAGTTGACCGCATGGCGCAGCATAGGAACACTCTGTTA  
16-3 AGATCCGGTACTGGAGACAGGAAGAGCAGGCCTCCCTCCTCT  
16-4 AGGGACTAGTTACCGTCCAGGATCGTGCGTGTCCCTCCCAAC  
16-5 CTCTTAGGTGACTACGCAATTTAAACGATTTGTATTCGTACC  
16-6 TATTACCTGGCCTTTGCGGCTCATGAACTCATCTGTGGAGAA  
16-7 CTCGCTCTCGTGAGCCTGGTATTGACACTGTTCTAGATAGCG  
16-8 GGATATATAAAGGGCGATCACGAGATATCGTGAATCGTCCAC  
16-9 GGTAATTGCCATAGTACTTAGACGACTTAAGGCGTAGGCCTA  
16-10 AAGCCTGCCTGGTCAGACTTCTAGATGCTCCCTATCGCATGC  
16-11 CCAAGAGTTCTCGCTCGACTCCATTCCCGCTGACGAGGTTGG  
16-12 CGTGTAACGCCTCTAAGTCGGCTGAGGAAAACATTAGAGTCGG  
16-13 TGTTTTGTCCATGACATATCCTTCTGCACGTGTTCACTAGATG  
16-14 AGCGCCAGAATTACTTCTTTTCGTTTCGCATCTTGCCCTCTCGA  
16-15 GCGCCAGGGCTGCAAGGCCTTTAGGGCTCTCATTTTTTTTTTT  
17-1 CCGGGTGGTAGTGAGAACGAGCGATGCGAAATTTTTTTTTTTT  
17-2 GCTTTAGCTGACTTATATGCATTCCTATGCTGCTCATATATA  
17-3 GGCTAATCACACGAATATTGCGGCCTGCTCTTTAACAGAGTG  
17-4 GAAACGTTCCGACCAATCTGAACACGCACGATAGAGGAGGGA  
17-5 CTACCTAAGCGATTCACTACCCAAATCGTTTAGTTGGGAGGG  
17-6 TTGGGAAAGGTTCCCGAAGAAATGAGTTTCATGGGTACGAATA  
17-7 CTGTGTATGTACTATAACTTGAACAGTGTCAATTCCTCCACAG  
17-8 CAAGTCTAACGATTTCTTAAACACGATATCTCCGCTATCTAG  
17-9 AAGCCAGAGTCACGCAGGGTTCCTTAAGTCGTGTGGACGATT

17-10 GGTTCCGCCATACGTTGTCCCTTGGGAGCATCTATAGGCCTACG  
17-11 ATTCCGTATACGGTGCCATCCCAGCGGGAATGGCATGCGATA  
17-12 AACCAATGAATGGCTCAGATCTGTTTCCTCAGCCAACCTCGT  
17-13 TGGAATCAGGGTTGTATGCGTACACGTGCAGACCGACTCTAA  
17-14 GCACCCAGTCCGAAACACGGTAAGATGCGAACCATCTAGTGA  
17-15 TTTTTTTTTTTTACGTTCGTTTCGTGAGAGCCCTATCGAGAGGGC  
18-1 TTTTTTTTTTCTCGTTTCTCACTATTATTGCCTCCTCCCTCTC  
18-2 TACCACCCGGTGCATATAAGTATAACAGAGGTAATTATTTGATG  
18-3 CAGCTAAAGCGCAATATTTCGTCTGGGAGATCAGTCTTTACTA  
18-4 GTGATTAGCCTCAGATTGGTCCCACATCGACCGCTCGGTATG  
18-5 CGAACGTTTTCGGTAGTGAATCGGACGTTGATCATGGTGGCAA  
18-6 GCTTAGGTAGTTCTTCGGGAATATTTCCATCCGGTCTAAGCA  
18-7 CCTTTCCCAACAAGTTATAGTGAAAGGGCCGTGTTGGGTCCC  
18-8 ACATACACAGTTTAAGAAATCGAAGTAACACTCCTGACGGGA  
18-9 GTTAGACTTGAACCCCTGCGTGGCACAATAGGCATAACGGACC  
18-10 ACTCTGGCTTAAGGACAACGTAAGAATGTTGACTACTGAAAAG  
18-11 ATGGCGAACCGGATGGCACCGGTTTCGGAACCTTGTCCGAAATT  
18-12 TATACGGAATGATCTGAGCCAGGTACAGGAAGGAGTTCGTCT  
18-13 TTCATTGGTTACGCATACAACAGGAGTTCGAGTCGACGCC  
18-14 CCTGATTCCAACCGTGTTCGGCGGAGAAAAGTTTGCCAAGAA  
18-15 GACTGGGTGCCGAACGACGTACGTAGGTTGTATTTTTTTTTTT  
19-1 TGGCAGGCATGATTGCTGTACAGGCAATAATTTTTTTTTTTT  
19-2 CAATCTGGTGCCGTGGAACCATACTCTGTATGAGAGGGAGG  
19-3 GGCTTGTGTGGCGTAACTTCGTGATCTCCCAGCATCAATAAT  
19-4 GTGCACGCAAATCGCCCGTTAGGTTCGATGTGGTAGTAAAGAC  
19-5 CGGCCGGGACGTGCCACCTCAGATCAACGTCCCATAACCGAGC  
19-6 AGTGACTCTCCTCGAGCGAAGGGATGGAAATATTGCCACCAT  
19-7 CCAGCGGGTCTATTCTAGACGACGGCCCTTCTGCTTAGACC  
19-8 TGCAGGCTACGATGGACGCTAAGTGTACTTCGGGACCCAAC  
19-9 GCTGAGTTCCGCGAATGTCCGGCCTATTGTGCTCCCGTCAGG  
19-10 TTATCCCGGCACCGCGTATGATCAACATTCCTTGGTCCGTTAT  
19-11 TCTTCGCACAAGAATTGCTTCAAGTTCCGAACCTTTCAGTAG  
19-12 TCGCACGCCTTGGGCAATCAACTTCCTGTACCAATTCGGAC  
19-13 ACGGCCATGTGTGTGACAACATCAGAACTCCTAGACGAACTC  
19-14 CCTGCGAGGCGTACCCTACTAACTTTCCTCCGCGGGCGTCGAC  
19-15 TTTTTTTTTTGGTGCGTGTATTACAACCTACGTTCTTGGCAA  
20-1 TTTTTTTTTTGTACAGCAATCTCCTATATGAAGCCAGGATAG  
20-2 ATGCCTGCCATGGTTCCACGGTCCCTCCCGATGGAAGGATAAG  
20-3 CACCAGATTGCGAAGTTACGCTCAATCCATAGTGTGCATACT  
20-4 CACACAAGCCTAACGGGCGATCGCTCCGACACGGCAACGAGC  
20-5 TTGCGTGCACTGAGGTGGCACAGAACGTGATCAAGGACCCAG  
20-6 GTCCCGGCCGCTTCGCTCGAGTGCTGATGATCCAATCAGCTC

20-7 GAGAGTCACTCGTCTAGAATAGCTCATGTGCCATGAGATAG  
20-8 GACCCGCTGGTAGCGTCCATCGGCATCTCCTAACTGTGCTCG  
20-9 GTAGCCTGCACGGACATTTCGCAAGGGCTGATACACCACTACA  
20-10 GGAAGTCAAGCTCATAACGCGGTAACCTATAGACCAAATAGACG  
20-11 GCCGGGATAAGAAGCAATTCTAATTTTCGTGCGGAAAGAGCCA  
20-12 TGTGCGAAGATTGATTGCCACCACAGGTGACTGTTCCCGCT  
20-13 AGGCGTGCATGTTGTCACACCACAGCAAAGGGTAAAGTCTC  
20-14 ACATGGCCGTTAGTAGGGTACTTAAGTATTCGTTCCGACGTC  
20-15 GCCTCGCAGGATACACGCACCAGAGTTCCGTATTTTTTTTTTT  
21-1 CGGGACGCGGTGACTCCCGACTTCATATAGGATTTTTTTTTTT  
21-2 TGAACGCTAGCCCTGTCTTGGCATCGGGAGGACTATCCTGGC  
21-3 AGGTTTATCGGAACGCTGGATCTATGGATTGACTTATCCTTC  
21-4 CCTCCCTGGAAGATGTACGACGTGTCGGAGCGAGTATGCACA  
21-5 GCTTCAGAAAGATAGGCCATAGATCACGTTCTGCTCGTTGCC  
21-6 GAACGGCTCAATAGCCTCAATGATCATCAGCACTGGGTCCTT  
21-7 GAGCTTCTCTCCTGTATAAATGGCACATGAGCGAGCTGATTG  
21-8 GATAATAAGCGGTAGTTAAGTTAGGAGATGCCCTATCTCATA  
21-9 TACAGGTTCCGGTGCTCCAATATCAGCCCTTCGAGCACAGT  
21-10 CCGACAACCTATATACGTTAGCGTCTATAGGTTTGTAGTGGTG  
21-11 GACCGAACCTGACCGGTTCGTCGCACGAAATTCGTCTATTTG  
21-12 TTCATTGGGTGCGGTAGGCGAGTCACCTGTGGTGGCTCTTTC  
21-13 AATGAACCTTGCTCTGGCATTCCCTTTGCTGTGAGCGGGAACA  
21-14 CACACTGCCCCGTCATGGGACCGAATACTTAAGAGACTTTAC  
21-15 TTTTTTTTTTTAACGTAGCTAATACGGAACCTTGACGTCGGAA  
22-1 TTTTTTTTTTTGTCGGGAGTCACTTTGTATCTGAATTTGGGCT  
22-2 CCGCGTCCCGCCAAGACAGGGTAGCTACCTATTAGGCCTGAC  
22-3 CTAGCGTTCAATCCAGCGTTCCCTCGACACCACGTAATGGCTG  
22-4 CGATAAACCTGTTCGTACATCTTGTGGGTCAGCGGGTACTAGG  
22-5 TCCAGGGAGGTATGGCCTATCTAGAAGGAATAAATTCAGCGG  
22-6 TTTCTGAAGCATTGAGGCTATTAGAATCTCTTATCAAAGAGG  
22-7 TGAGCCGTTCAATTATACAGGACAATCTCCGGCTTCTAGTAA  
22-8 AGAGAAGCTCACTTAACTACCCATGATATGGGCACCTCCGTT  
22-9 GCTTATTATCTTGGAGCACCGCCACCCTCGTCGAGCGGGAT  
22-10 CGAACCTGTAGCTAACGTATATTATTAAGAAAGAATGTGTGT  
22-11 TAGTTGTGCGGACGACCGGTCCACACGTTCTTCTCATTTGAAT  
22-12 AGGTTCCGGTCTCGCCTACGCGCGCGCTTGCCGAATTCAGC  
22-13 ACCCAATGAAGAATGCCAGAGATGAAATACTTGGTGAGTTAA  
22-14 CAAGTTCATTGTCCCATTGACACACGTGTCAAGCGAACTAT  
22-15 GGGCAGTGTGTTAGCTACGTTGTGCGTCTAGGTTTTTTTTTT  
23-1 GAGTAGCATTCTCATGGGCGCCAGATACAAAGTTTTTTTTTT  
23-2 GGGACTCATGAGGTTTGATGCATAGGTAGCTAAGGCCCAATT  
23-3 TTAAGTCTAGCGGGACCGCCGTGGTGTGAGGTCAGGCCTA

23-4 ATGACCGCAACCAGTGTACGCGCTGACCCACACAGCCATTAC  
23-5 ATCAGGGCAGTATTACATCATTATTCCCTTCTACCTAGTACCC  
23-6 CTTAAGTAGCGAAACCCTATTAAGAGATTCTACCGCTGAATT  
23-7 TGGATGCTCCTATTCCCGGACCCGGAGATTGTCTCTTTGAT  
23-8 GAAGCCCTGCCCGAGGGTACACCCATATCATGTTACTAGAAG  
23-9 AAGTTAGATAATCCGTAGCACACGAGGGTGGGAACGGAGGTG  
23-10 CAAATTGGCTGACCTTAGTTGTTTCTTAATAAAATCCCGCTCG  
23-11 ACAACCAGGTCTGATTGTCTCAAGAACGTGTGACACACATTC  
23-12 CTTATTTGAGACTATCCATTTCGGCCAAGCGGATTCAATGAG  
23-13 GATCGATTTAGTAATCATCTAAAGTATTTTCATGCTGCAATTC  
23-14 AGTCTACTGCCGGTATCCCATTTGACACGTGTTAACTCACC  
23-15 TTTTTTTTTTTCGTGCGGTAAGCCTAGACGCACATAGTTTCGC  
24-1 TTTTTTTTTTTCGCGCCATGAGTCAGACAGACTGGCTCCGCAG  
24-2 AATGCTACTCGCATCAAACCTGAATAGGGTAAACCCCTAAGGC  
24-3 CATGAGTCCCGGCGGTCCCGCCCACTCCAGTTGCGTCCCTACT  
24-4 TAGAGTTTAAAGCGTACACTGGTTCTCTGGTAGTGCGCGTATC  
24-5 TTGCGGTCATATGATGTAATATATGTCTTAATACGTCGTGAC  
24-6 CTGCCCTGATAATAGGGTTTCTCGAGCATTAATGGTCATCTA  
24-7 GCTACTTAAGGTCCGGGAATAAGGGCGTGCAACTACTCAA  
24-8 GGAGCATCCATGTACCCTCGGCTATCTACGATGCACTAGCAC  
24-9 GCAGGGCTTCGTGCTACGGATTGGAGCCAAATCATTAACCTG  
24-10 TATCTAACTTCAACTAAGGTCACAATGAGTCACCGTCGAGGA  
24-11 AGCCAATTTGGAGACAATCAGGGCGTTTAAACCAAGCTACGT  
24-12 ACCTGGTTGTGAATGGATAGTCGTGCATGGTGGTTCACTACA  
24-13 CTCAAATAAGTAGATGATTACGGCTCCTGCTTATCGTCTCCT  
24-14 TAAATCGATCATGGGATACCGTGGGCCTGTCGGTACCGACTC  
24-15 GCAGTAGACTCTTACCGCACGCCAACAACTGTTTTTTTTTTTT  
25-1 AGTCTGTCTGATTTTTTTTTTTTT  
25-2 TTACCCTATTCCCTGCGGAGCC  
25-3 AACTGGAGTGGGCCTTAGGGT  
25-4 CTACCAGAGAAAGTAGGACGC  
25-5 ATTAAGACATAGATACGCGCA  
25-6 TTAATGCTCGAGTCACGACGT  
25-7 TGACACGCCCTTAGATGACCA  
25-8 ATCGTAGATAGTTTGAGTAGT  
25-9 ATTTGGCTCCAGTGCTAGTGC  
25-10 TGACTCATTGTGTCAGGTAAATG  
25-11 GTTTAAACGCCTCCTCGACGG  
25-12 CACCATGCACGACGTAGCTTG  
25-13 AAGCAGGAGCCTGTAGTGAAC  
25-14 CGACAGGCCCAAGGAGACGAT  
25-15 ACAGTTGTTGGGAGTCGGTAC

Motif 4.1 (24H×29T)

| Name | Sequence                                     |
|------|----------------------------------------------|
| 1-1  | GGTCGAGGGATTTTTTTTTTTT                       |
| 1-2  | TGCCGCTCGACGATATCGAGC                        |
| 1-3  | CACTTAGTTTGGGAGGGCCTC                        |
| 1-4  | TGAAGCATCCTAAAGCGTATC                        |
| 1-5  | GGGAATATCCAATCTTAGGTG                        |
| 1-6  | GATATGCTTAGGCCAATAAAC                        |
| 1-7  | CCCTTAGGCTCCAACAAGGTG                        |
| 1-8  | CGTGCTATGATTGCACTCACT                        |
| 1-9  | CTATTAGGAAGTACATCCGTT                        |
| 1-10 | AACATACAGGCCTTAGGAGTT                        |
| 1-11 | CTCCGGTCGGGAATAGTTGAT                        |
| 1-12 | TTTAACACGTGTAGGGATTTT                        |
| 1-13 | TGATAACCTAAGTATGAGCTG                        |
| 1-14 | GACGTCCGTAGGTCAAAGCGA                        |
| 1-15 | TCCTACCGATCCGCGGAAGCC                        |
| 2-1  | TCCCTCGACCGCTCGATATCGTTTACTCTGAGCTTAAAGGCC   |
| 2-2  | TCGAGCGGCAGAGGCCCTCCCAGAAAAGCAATCGGCCTATCAA  |
| 2-3  | AAACTAAGTGGATACGCTTTATCAGAACGCTCGGCCATGTTT   |
| 2-4  | GGATGCTTACACCTAAGATTCCCTCCAGCTCCACGCCTTGTG   |
| 2-5  | GGATATTCCCGTTTATTGGCCTGTCATATTCGCGGGACTGA    |
| 2-6  | TAAGCATATCCACCTTGTGGAGAGGATTAAACCTACCGTGC    |
| 2-7  | AGCCTAAGGGAGTGAGTGCAAATATATGAATTAGGTATCGTA   |
| 2-8  | TCATAGCACGAACGGATGTACGGGATACTCTGGACGGGCTTC   |
| 2-9  | TTCCCTAATAGAACTCCCTAAGGGCATCAACACGCGGATGATG  |
| 2-10 | CCTGTATGTTATCAACTATTCAGCATCATATAACGTATTTCT   |
| 2-11 | CCGACCGGAGGAAATCCCTACACAGCAGACCCAATCCTCCTG   |
| 2-12 | ACGTGTTAAACAGCTCATACTATACGCGTAGTTTAGGCACTG   |
| 2-13 | TAGGTTATCATCGCTTTGACCGGTTTGCGCCATGCGGTTG     |
| 2-14 | TACGGACGTCGGCTTCCGCGGCAACTCTACTAACGGGCGTGA   |
| 2-15 | ATCGGTAGGATTTTTTTTTTTTTCTGGGCGTTTTTTTTTTTTTT |
| 3-1  | TCAGAGTAAATTTTTTTTTTTTCGGCATTTCATTTTTTTTTTTT |
| 3-2  | ATTGCTTTCTGGCCTTTAAGCTATCCTAGCCGAATCAGGAAC   |
| 3-3  | AGCGTTCTGATTGATAGGCCGCAGAGGCAATACCCGCTTATA   |
| 3-4  | GAGCTGGAGGAAACATGGCCGAGAACTACTTCATTAAGTTCG   |
| 3-5  | AAATATGACACACAAGGCGTGGTCCGTACAGTTTGCCTCGAG   |
| 3-6  | TTAATCCTCTTCAGTCCCGGTATCGTACGAGTCGGGTGTAA    |
| 3-7  | ATTCATATATGCACGGTAGGTAGCTGCCCTGTACACCTCTGC   |
| 3-8  | AGAGTATCCCTACGATACCTATTCTCCGTGGCGTGGCCGATT   |
| 3-9  | GTGTTGATGCGAAGCCCGTCCCTTGAAGCCAACGCAATTTCTGA |

3-10 ATATGATGCTCATCATCGCGCACGTCCCAAATAATCTAAGGA  
3-11 GGTCTGCTGTAGAAATACGTTCAAACCTGATACGAGAGTTTA  
3-12 CTACGCGTATCAGGAGGATTGTTGGCAATATAGTAGATGGCC  
3-13 GCGCAAACGCCAGTGCCTAAATCTGCGAAGAGGAAGGAACAT  
3-14 AGTAGAGTTGCAACCGCATGGCGTGGGTGGACTTCTTGCTGC  
3-15 AACGCCCAGATCACGCCCGTTTGAAGGCCACGGAAACACGC  
4-1 TGAAATGCCGGTTCCTGATTCCCTGAAGCGGCTCCCTAGATA  
4-2 GGCTAGGATATATAAGCGGGTGTAGGGAGTAGTTCCCTCCT  
4-3 ATTGCCCTCTGCGACTTTAATGCCTACGTTCGTGTGCAACCTG  
4-4 AAGTAGTTCTCTCGAGGCAAAGTACAACCTATAGAGCTGTTCCT  
4-5 CTGTACGGACTTACACCCGACATAGTGGTGGTACAGGGCCGA  
4-6 TCGTACGATAGCAGAGGTGTAATTTATTAATGTTCTATACTA  
4-7 CAGGGCAGCTAATCGGCCACGGCGCAGTGACCATGTGCCATT  
4-8 CCACGGAGAATCGAAATTGCGCAGGAATGAGGGTACACATGC  
4-9 TTGGCTTCAATCCTTAGATTATTCATATGACGTGCTCTGGCT  
4-10 TTTGGGACGTTAAACTCTCGTTCGCTCGGTCCCTGGGCTTCCC  
4-11 ATCAAGTTTGGGCCATCTACTGGCTTGATGGCGTGCTACGCA  
4-12 ATATTGCCAAATGTTCCCTTCCAGCCCGGGCGGCTGTGTTACT  
4-13 TCTTCGCAGAGCAGCAAGAAGAAAGCATGTATGTCGATTCCCT  
4-14 TCCACCCACGGCGTGTTCGGATAAACTTAATFGAGTTAGT  
4-15 TAGGCCTTCATTTTTTTTTTTTGACCGACCCTTTTTTTTTTTT  
5-1 CCGCTTCAGTTTTTTTTTTTTTACGCACATTGTTTTTTTTTTTT  
5-2 ACTCCCTAGCTATCTAGGGAGACGAGACTACGGATCCTAAG  
5-3 ACGACGTAGGAGGAGGAACTGGCAAAGACCTAGTTAATCAC  
5-4 ATAGTTGTACCAGGTTGCACAAGGTCTGTGTCCGAAGCGAC  
5-5 CCACCACTATAGAACAGCTCTAGATAAAGCGTCTTTGCAAATG  
5-6 ATTAATAAATTCGGCCCTGTAGAAGGCAGCGTGTGAAAGTC  
5-7 GTCACTGCGCTAGTATAGAACTTATTGTATTACAAAGCTATA  
5-8 CTCATTCCCTGAATGGCACATGAAAGAGGATCGCTTTCGGCCG  
5-9 GTCATATGAAGCATGTGTACCTGTGAACTTGAAACTTTATG  
5-10 GACCGAGCGAAGCCAGAGCACAGTAGAGCCCTATCGCCCTTA  
5-11 CCATCAAGCCGGGAAGCCAGAAGTGCTTGTGGGAGCGGAGA  
5-12 CGCCCGGGCTTGCGTAGCACGGCTGCTTTAAGACCCGCGTGA  
5-13 TACATGCTTTAGTAACACAGCTTGACCCGATGCCTCTATACA  
5-14 TAAGTTTATCAGGAATCGACAACCGCCGGAAGTAATACGCAC  
5-15 AGGGTCGGTCACTAACTCAATTGTACAGCAACTACTTTAATA  
6-1 CAATGTGCGTCTTAGGATCCCAATCCCTATCATAAAGCCAC  
6-2 GTAGTCTCGTGTGATTAACATAACGGCTAGTTTACTCATAT  
6-3 GGTCTTTGCCGTGCTTCGGATCAGAACTGTATAAAGCATCA  
6-4 CACAGGACCTCATTTGCAAAGGGCCCGTTACTAGGGTAGCAA  
6-5 ACGCTTATCTGACTTTCACACCGTGCCATTGGGTTCGTCCACG  
6-6 GCTCGCCTTCTATAGCTTTGTCCCTAATCGGTGGCTTCATGAG

6-7 AATACAATAACGGCCGAAAGCATCGGTCCTCGGGTGCTCAGA  
6-8 GATCCTCTTTCATAAAGTTTCACGTACAGGTTGAGATCGTCC  
6-9 CAAGTTCACATAAGGGCGATACTCCGCCGACCGACAGGAGTA  
6-10 GGGCTCTACTTCTCCGCTCCCTGGTTCTCCTCGATGGTCAGC  
6-11 ACAAGCACTTTCACGCGGGTCGAGTATTAGGTAATCGAATCG  
6-12 TTAAAGCAGCTGTATAGAGGCAAACCATCCGCGACGCTTCGC  
6-13 ATCGGGTCAAGTGCCTATTACTAATTAGAACCCTAACTTTCT  
6-14 TTCCGGCGGTTATTAAAGTAGGTTTAGGAATACTGAATCTCG  
6-15 TTGCTGTACATTTTTTTTTTTTTCACGTAAGAGTTTTTTTTTTTT  
7-1 GATAGGGATTTTTTTTTTTTTTCAACTCCCATTTTTTTTTTTTT  
7-2 CTAGCCGTTAGTGGGCTTTATCGCTGGCAGCTGAATCGGGAG  
7-3 ACAGTTCGAATATGAGTAAAGACAACCTCGATAGTAATAACA  
7-4 GTAACGGGCCTGATGCTTTATGTCTCTTTCCCTCCCGACTCC  
7-5 CAATGGCACGTTGCTACCCTATCAAGTTACGGGTAGACACGT  
7-6 ACCGATTAGGCGTGGACGACCTAACTGACAGGAATGGAAAGG  
7-7 GAGGACCGATCTCATGAAGCCTTGTTAAGGGTCAAAGAATTG  
7-8 ACCTGTACGTTCTGAGCACCCCTAGAGTAAGCCCTCGACGACA  
7-9 GTCGGCGGAGGGACGATCTCAAACGAAAGTCTCCGTATTACA  
7-10 AGGAGAACCATACTCCTGTCTCGTCCCTTAATAGCTCTCTATAT  
7-11 CCTAATACTCGCTGACCATCGGGCGGTTTGTTCCAACTTCA  
7-12 CGGATGGTTTTCGATTTCGATTAGCGGCTTCCCTGGTTCATCAGC  
7-13 GTTCTAATTAGCGAAGCGTTCGCTCCTACCACCTAACGCGCT  
7-14 ATTCCTAAACAGAAAGTTAGGGTTTACGGTGGCATTCATCTA  
7-15 CTCTTACGTGCGAGATTCAGTCTTTGCTCTCGAACTGGAATT  
8-1 ATGGGAGTTGCTCCCGATTCACGGAGGTAAACACTGCAAGCG  
8-2 GCTGCCAGCGTGTTATTACTAGGCTTGACTATTCGGTTCTGC  
8-3 TCGAGTTGTGCGAGTCCGGAAACGCACGGTCTTTAAGAAACA  
8-4 GGAAAGAGACACGTGTCTACCTTGCACCTCCCTCCCTGCACT  
8-5 CGTAACTTGACCTTTCCATTTCGTCTCTAGGGCAAATGCAAAG  
8-6 CTGTACAGTTACAATTCCTTTGAATCGATTTAACAGGCCGGATC  
8-7 CCCTTAACAATGTCTGTCGAGGGCTCGCGGATACCTGTGGTCT  
8-8 GCTTACTCTATGTAATACGGATCGGATACGCACCTGCCCAT  
8-9 GACTTTCGTTATATAGAGAGCGTCAAAGTTACCGCGACCCAT  
8-10 TATTAAGGGATGAAGTTGGAACCGGCTCTTTAATACCTCCAA  
8-11 CAAACGCGCCGCTGATGAACCGATACGCAGGAGTCGATGACG  
8-12 AGGAAGCCGCAGCGGTTAGGTCTTTACGCGGTTACATACGG  
8-13 TGGTAGGAGGTAGATGAATGCCCAATTCGAGCTGCGCAGAA  
8-14 CACCGTAAACAATTCAGTTCAGTGGGAACCTGGGAGCCGTG  
8-15 GAGAGCAAAGTTTTTTTTTTTTTGC GCGGTTGATTTTTTTTTTTTT  
9-1 TTTACCTCCGTTTTTTTTTTTTTACCGAAGGAATTTTTTTTTTTTT  
9-2 TAGTCAAGCCCCGCTTGCAGTGTCCAGAAGAAGCGTGGCTGCG  
9-3 GACCGTGCCTGCAGAACCGAAGTTGATAGGTGGTGCTTTGCA

9-4 GGAGGTGCAATGTTTCTTAAAGGTCAATCCCTCCCCTAGGC  
9-5 CCCTAGAGACAGTGCAGGGAGCTTATAATTATCCCTTTACGA  
9-6 TTAAATCGATCTTTTGCATTTGTGAGCTGGCCGATCTACTTCC  
9-7 ATCCGCGAGCGATCCGGCCTGCCACCATGCACGAGCGACCTG  
9-8 GCGTATCCGAAGACCACAGGTCCCTAACGACAGGCCCTAGTCT  
9-9 TAACTTTGACAATGGGCAGGTATTGTCAGACCCTTTAGAGTT  
9-10 AAAGAGCCGGATGGGTTCGCGGTAGTAATGTGGATTGCGACAC  
9-11 CCTGCGTATCTTGAGGTATTGGAGGCTACCGCGAACTTGTC  
9-12 CGCGTAAAGACGTCATCGACTGGGCCGGTAGCCTTAAAGTGC  
9-13 TCGGAATTGGCCGTATGTAATACTGCGACGCAAGATCTTCC  
9-14 GGTTCCCCTTTCTGCGCAGCGGCTCTTCGCTATTGGTTGAC  
9-15 TCAACCGCGCCACGGCTCCCAATGTACCACTATCCCGCGCTG  
10-1 TTCTTTCGGTTCGACCCACGCGTAGACCGCTGTTTCTTCGGT  
10-2 TTCTTCTGGATGCAAAGCACCATCACAGACGAAATGGTACTC  
10-3 ACCTATCAACGCCTAGTGGGATTACCCCTCAGGGCTCAGCCC  
10-4 GGGATTGACCTCGTAAAGGGAATACCAGAATCAATGTGACTC  
10-5 TAATTATAAGGGAAGTAGATCTGCATTTTCAGCGGCACCTCCT  
10-6 GGCCAGCTCACAGGTCGCTCGGCGCTGACCCTGTTTCGGTGTA  
10-7 TGCATGGTGGAGACTAGGCCTAGAGAATTTAGCTTACATCTC  
10-8 GTCGTTAGGGAATCTAAAGGCCTGTCTTTACCCACGTAAGG  
10-9 GTCTGACAATGTGTGCAATCAAGGAGCCCTGCCCTAAGCAC  
10-10 CACATTACTAGACAAGTTTCGCGTACACGAAGATGATGACGCA  
10-11 GGTAGCCTCCGCACTTTAAGGATAGATAGGGAAAGACTGGCT  
10-12 CTACCGGCCCGGAAGATCTTGAGCGCCAGAAGGGAAGAAGTA  
10-13 CGTCGCAGTAGTCAACCAATAAAGTGGCCTAATAACAGTGCT  
10-14 GCGAAGAGCCCAGCGCGGGATTATCAACATAGGGCTTTGGCC  
10-15 AGTGGTACATTTTTTTTTTTTTATTTAGTGCTTTTTTTTTTTTT  
11-1 AGCGGTCTACTTTTTTTTTTTTTTCGCATCTCTTTTTTTTTTTTT  
11-2 CGTCTGTGATACCGAAGAACTCGCGAGCCGCTAGGTGTGGA  
11-3 CTGAGGGTAAGAGTACCATTTAGTCTCAGAGCCATCCTGCCCT  
11-4 ATTCTGGTATGGGCTGAGGCCCTGGTATGTATGTACGTGTCC  
11-5 CTGAAATGCAGAGTCACATTGTCTGAAAGGGTCTCATATGGC  
11-6 GGGTCAGCGCAGGAGGTGCCGGTAGGACCGTCTGAAACAGGC  
11-7 TAAATTCTCTTACACCGAACACAACCATGACAGCTCCCGCTG  
11-8 TAAAGACAGGGAGATGTAAGCGAGCCCTTCGAGCTTCTGCAC  
11-9 AGGGCTCCTTCCTTACGTGGGTGCAGGTAGGCCGTTTCTTAC  
11-10 CTTCTGTGACGTGCTTAGGGCCTTGTACAATTTACCGGTCAT  
11-11 CCCTATCTATTGCGTCATCATCTTCACTGACTCCATATCCCG  
11-12 TTCTGGCGCTAGCCAGTCTTTAGAACAACACACGCCACTGTA  
11-13 TAGGCCACTTTACTTCTTCCCATTACGGGAAAGCGTGACTTA  
11-14 TATGTTGATAAGCACTGTTATTTAGAACGGACAGAATAAATA  
11-15 AGCACTAAATGGCCAAAGCCCAGGTTAGTTGTGGAACCTCGC

12-1 GAGATGCGAATCCACACCTAGTTGAGTCGTTATGTAGCCTCT  
12-2 CGGCTCGCGAAGGCAGGATGGGCAGACGCGTTCAATCACATG  
12-3 CTCTGAGACTGGACACGTACATGACGACAATCTTGTTTATGC  
12-4 TACATAACCAGGCCATATGAGACTTAGCGGAGATTGGTCACCT  
12-5 CCCTTTCAGAGCCTGTTTCAGGTTAGCCGTATTGTCGCTTCA  
12-6 ACGGTCCTACCAGCGGGAGCTGCTTATTACTTATGAGGGCTA  
12-7 GTCATGGTTGGTGCAGAAGCTGAGTTATCTCCGCGGACCGCT  
12-8 CGAAGGGCTCGTAAGAAACGGTCGGGTAGTACTTAACTCACT  
12-9 CCTACCTGCAATGACCGGTAAAGAGAAACACATATAGTCAGG  
12-10 ATTGTACAAGCGGGATATGGACCGTGAAAAGCTTACCTAAGAG  
12-11 GTCAGTGAAGTACAGTGGCGTTACGGTTGGGCGGAGGGCAT  
12-12 GTGTTGTTCTTAAGTCACGCTATGCAGACTAAAATATCGTATG  
12-13 TTCCCGTAATTATTTATTCTGTTGAGGCCCATTAGCATCCAC  
12-14 TCCGTTCTAAGCGAGGTTCCAGACCATCCATATAAGGAACGC  
12-15 CAACTAACCTTTTTTTTTTTTTTCGTTTATATTTTTTTTTTTTTT  
13-1 AACGACTCAATTTTTTTTTTTTTTAAGGTCCATTTTTTTTTTTTT  
13-2 ACGCGTCTGCAGAGGCTACATAACAAGCCTATATGCTTTACTG  
13-3 ATTGTCGTCACATGTGATTGATCACCTCAGTATGAAAACATA  
13-4 CTCCGCTAAGGCATAAACAAGCCGTGTCTGGGCGCTACCAAG  
13-5 TACGGCTAACAGGTGACCAATGTATTGAGGTGTGGGCGGGCT  
13-6 AGTAATAAGCTGAAGCGACAACGACCCCTTAGGACGGCATTTG  
13-7 GAGATAACTCTAGCCCTCATAACCTCCAACCGGCTTTGTGTA  
13-8 TACTACCCGAAGCGGTCCGCGTCACGAACTGCAACTGAATCG  
13-9 GTGTTTCTCTAGTGAGTTAAGGATGGTCACGAGGGTCGTGGT  
13-10 GCTTTCACGGCCTGACTATATGTACCGCTCAATCGCCGTTAG  
13-11 CCCAACCGTACTCTTAGGTAAGTGCAGCGTCGACACAATCGT  
13-12 TAGTCTGCATATGCCCTCGCGTTAACCAGCCAGACGTTTCAGG  
13-13 TGGGCCTCAACATACGATATTGGATATGTTTAGCATAGACCG  
13-14 ATGGATGGTCGTGGATGCTAATGTAAATACACAAGGTATGGA  
13-15 AATATAAACGGCGTTCCTTATGCAGTGATTTACAGGGCTCAA  
14-1 TGGACCTTAACAGTAAAGCATTAGGAGTCCAGGTAATCATAA  
14-2 ATAGGCTTGTTATGCTTTCATGTGCAGAATTGAACATTTATCA  
14-3 ACTGAGGTGACTTGGTAGCGCCGATTTCGAGTACAATTAGAAA  
14-4 CCAGACACGGAGCCCCGCCACCTTCTCTGTGCACCCAGATA  
14-5 ACCTCAATACCAAATGCCGTCGAAAAGACGAATAGAAAATTGAC  
14-6 CTAAGGGTTCGTACACAAAGCCTTCTCTAAAGCAGTCGCTCT  
14-7 GGTTGGAGGTTCGATTCAGTTGACCTTATAGCCGTCGCGTGGC  
14-8 CAGTTCGTGAACCACGACCTATATACACGTCTTGAGCATTT  
14-9 CGTGACCATCTAACGGCGATAGCCGCACGTTAGTAACTGTG  
14-10 TGAGCGGTACACGATTGTGTTCGTATAAATCAAGCGGGCCTCT  
14-11 GACGCTGCAGCCTGAACGTCTTGGCTGGCCTGGAATGGTAAA  
14-12 GGCTGGTTAACGGTCTATGCTCGGCCGGTACTCTTGTCCAGA

14-13 AAACATATCCTCCATACCTTGCGCGAGCCTGGCATATTTAGC  
14-14 TGTATTAACATTGAGCCCTGTGTCACCAGATCTATGGGTATC  
14-15 AAATCACTGCTTTTTTTTTTTTCTTCTGGAAGTTTTTTTTTTTT  
15-1 TGGACTCCTATTTTTTTTTTTTATCTTGCCCTTTTTTTTTTTTT  
15-2 AATTCTGCACTTATGATTACCCATACCCATGCTGTTTATGTA  
15-3 ACTCGAATCGTGATAATGTTCCCTACCTCTACGCTCGCGTTG  
15-4 ACAGAGAAAGTTTCTAATTGTGCTTGGGAAACGGCCTGGAGA  
15-5 TTCGTCTTTCTATCTGGGTGCCGTCTATATATAAAGTTCTGA  
15-6 TTTAGAGGAAGTCAATTTCTATTTCCATGGCCAGCCCAAGAG  
15-7 GCTATAAGGTAGAGCGACTGCTTAATAGGGCGAATTACGGTA  
15-8 ACGTGTATATGCCACGCGACGTTCCACTTTCCCTTTGACGTA  
15-9 ACGTGCGGCTAAATGCTCAGGGCATAACAACCACAACCGATCT  
15-10 TGAATTATACCACAGTTACTATGGACTAAATGTGAGTGTCCC  
15-11 AGGCCAGCCAAGAGGCCCGCTCTAGTACAAAAGCAAAGAGTAA  
15-12 GTACCGGCCCGTTTACCATTCCAGTAACAATCATGCCAAAGGA  
15-13 CAGGCTCGCGTCTGGACAAGAGAACACGGTCTCTCAGCCGCG  
15-14 ATCTGGTGACGCTAAATATGCATAGAGCAAACATGGTGTGTC  
15-15 CTTCCAGAAGGATACCCATAGGCATGAGCTCCTGGCGTTGCT  
16-1 AGGGCAAGATTACATAAACAGAGAGTTGCGCCGGACCGACTC  
16-2 CATGGGTATGCAACGCGAGCGCAATATCACCTATCAGAGAT  
16-3 TAGAGGTAGGTCTCCAGGCCGATACTATGACTAGCCCAAACA  
16-4 TTTCCCAAGCTCAGAACTTTAAATAAGATTTCGTAACCTGCC  
16-5 TATATAGACGCTCTTGGGCTGGCTCTGTCTATTAACCTAGAT  
16-6 GCCATGGAAATACCGTAATTCTGATGTGTGCGACGCGAGACC  
16-7 GCCCTATTAATACGTCAAAGGATGATAGGTCGAGTGGTGCAA  
16-8 GAAAGTGGAAAGATCGGTTGTGCGAAGCTTATGCACTCATTGG  
16-9 GGTTGTATGCGGGACACTCACACCCGGTAGAGAGTGGTCCAA  
16-10 ATTTAGTCCATTACTCTTTTGCCAACAGATCGACGTTTGATTG  
16-11 TTTGTACTAGTCCTTTGGCATGTAAAGTTTGTCTCGGTCTG  
16-12 GATTGTTACTCGCGGCTGAGACCTCGGTGCTGTTCTGACTG  
16-13 GACCGTGTTCGACACACCATGTTCCGAGATCGTTTATTCAGC  
16-14 TTTGCTCTATAGCAACGCCAGAGGCTGAGCGAACGTAGGCCG  
16-15 GAGCTCATGCTTTTTTTTTTTTCCGGGAGTAGTTTTTTTTTTTT  
17-1 GCGCAACTCTTTTTTTTTTTTTAGTGTATGAGTTTTTTTTTTTT  
17-2 GTGATATTGGGAGTCGGTCCGATGCACGGGTAAGCACATAAT  
17-3 GTCATAGTATATCTCTGATAGATCACCGGAATGCAGACGTC  
17-4 GAATCTTATTTGTTTGGGCTAAGGGCTTCCTCGGCATTTACC  
17-5 TAGACAGAGCGGGCAGGTTACTACTGCAAACGAGTGAATTTA  
17-6 GCACACATCAATCTAGGTTAACTTGTGAGACGGCGAGTACCG  
17-7 GACCTATCATGGTCTCGCGTCGCATGTGATAATCCTCCCGCT  
17-8 ATAAGCTTCGTTGCACCACTCCAGAAGTCTTGAGTGTGGAGA  
17-9 TCTACCGGGTCCAATGAGTGCCACCGTGCACGCAGTCCCTAC

17-10 CGATCTGTTGTTGGACCACTCGGCCCTCCATGAGGGTTTAGC  
17-11 CAAACTTTACCAATCAAACGTTTATCAATAAGCTCGCGTATG  
17-12 GCGACCGAGGCAGACCGAGAAGTTAGAGTGCTCCATCTCTCT  
17-13 GATCTCCGAACAGTACGAACACGATATAGTATGGTCGTAAGG  
17-14 CGCTCAGCCTGCTGAATAAACCGTTGTTTAAGCGACCGGACC  
17-15 CTACTCCCGGGCCCTACGTTATCTCTCTAACCTATCCCTGA  
18-1 CTCATACACTATTATGTGCTTATTGCCGGGTCTGTTGCTCTT  
18-2 ACCCGTGCATGACGTCTGCATCGAAATCATTGGCCGCGCCCT  
18-3 TCGCGGTGATGGTAAATGCCGCTCATCAATCAATATAAGCTT  
18-4 AGGAAGCCCTTAAATTCACTCAACTAACTGGAAACCACCAAC  
18-5 GTTTGCAGTACGGTACTCGCCAGGTCATACGAATAATGTGCG  
18-6 GTCTCACAAGAGCGGGAGGATCAAAGAGAGGCCATAATTTCTT  
18-7 TATCACATGCTCTCCACACTCGGGTCACCACGTCGTTAAATG  
18-8 AAGACTTCTGGTAGGGACTGCTCTCATTGGCGACAGCGATGG  
18-9 GTGCACGGTGGCTAAACCCCTCCCATCACGTCTACCGATGCAT  
18-10 ATGGAGGGCCCATACGCGAGCCATTACCGAGACAACTTTGG  
18-11 TTATTGATAAAGAGAGATGGAGCACGTGGGTACCATCTGCTA  
18-12 GCACTCTAACCCCTTACGACCACCGCACCGCTGTACGACGGCT  
18-13 TACTATATCGGGTCCGGTCGCGTGCTCCAATTGCCGCTGTTG  
18-14 TTAAACAACGTCAGGGATAGGTGCTAACGTTTAAACGCTAGAT  
18-15 TTAGAGAGATTTTTTTTTTTTTCTCGGTCATGTTTTTTTTTTTT  
19-1 ACCCGGCAATTTTTTTTTTTTTTAGTGAGCGGATTTTTTTTTTTTT  
19-2 AATGATTTTGAAGAGCAACAGATAGAACTATTGATTGTAAAG  
19-3 GATTGATGAGAGGGCGCGGCCATGGACGTCGTCGTCCTCAAAC  
19-4 CCAGTTAGTTAAGCTTATATTCTACGATAACGCTCTAGCCTT  
19-5 CGTATGACCTGTTGGTGGTTTTGTGACTTACGCTACCCCTCGAT  
19-6 CCTCTCTTTGCGCACATTATTCTTAAACAGGCGGTAGTTCTT  
19-7 GTGGTGACCCAGGAAATTAGGTGGAATAATATCTGATCCACA  
19-8 GCCAATGAGACATTTAACGACCACTCTACAGAGCATTTGCTC  
19-9 GACGTGATGGCCATCGCTGTCTCACCCCTACTCATTCATACTC  
19-10 TCGGTAATGGATGCATCGGTAGCGTGGAGATCGAGATTTGAA  
19-11 ACCCACGTGCCCAAAGTTGTCTGGCGTGTAGGCTACTCTGTT  
19-12 AGCGGTGCGGTAGCAGATGGTTTTGCTTCGCGGAGACTCCTA  
19-13 ATTTGGAGCACAGCCGTCGTACCCTACACGATACGGGTCCCTCA  
19-14 AACGTTAGCACAACAGCGGCAACAGAACGACCAGAAAACGAAT  
19-15 CATGACCGAGATCTAGCGTTATGAAGGATGTAGTGGTTTAGA  
20-1 TCCGCTCACTCTTTACAATCACTATTTACGTGAATGTACAAT  
20-2 ATAGTTCTATGTTTGAGACGAAACGTACCGCCTTAGCTAGGT  
20-3 CGACGTCCATAAGGCTAGAGCGTTACGTCTAGGTGAGGACCA  
20-4 GTTATCGTAGATCGAGGGTAGGGCAGTCATCCGCTCAGTAAC  
20-5 CGTAAAGTCACAAGAACTACCGAACCGACAAGGCACGAAAACGA  
20-6 CCTGTTTAAAGTGTGGATCAGAGTACTGTACATACGCGTCCTT

20-7 TATTATTCCAGAGCAAATGCTCGACAGGTGTAAGCCGCCCTC  
20-8 CTGTAGAGTGGAGTATGAATGAACCCACCGTCAAAGCTAGCG  
20-9 AGTAGGGTGATTCAAATCTCGAGGTTTAAGTTTCCGGGACTG  
20-10 ATCTCCACGCAACAGAGTAGCGACACGGTCGATGCAATACCG  
20-11 CTACACGCCATAGGAGTCTCGGGTCGACCTCTTTGGAGGTGA  
20-12 CGCGAAGCAATGAGGACCCGTGCGGGTTAGTACAATCTACAT  
20-13 ATCGTGTAGGATTCGTTTCTGAAAGAATCAAAGCATCTTTAT  
20-14 GTCGTTCTGTTCTAAACCACTCGTCCAGGGACCTAATAAACT  
20-15 ACATCCTTCATTTTTTTTTTTTTTGCATGCTGGTTTTTTTTTTTT  
21-1 ACGTAAATAGTTTTTTTTTTTTTCTTCTATGATTTTTTTTTTTTT  
21-2 GCGGTACGTTATTGTACATTCCGGTGCCGACTCTTTCCCATCG  
21-3 TAGACGTAACACCTAGCTAAGCAGATCTAATACGAGGCTAAA  
21-4 GATGACTGCCTGGTCCTCACCTAACCCGGGCACAGTAACCAC  
21-5 CTTGTGCGGTTGTTACTGAGCGCAAGGCCAGTACCCTGGAAGG  
21-6 TGTACAGTACTCGTTTCGTGCCGCCCGGTAAGAAATAGTCGG  
21-7 ACACCTGTGCAAGGACGCGTACCCGATAATTCGGGAGATAGT  
21-8 ACGGTGGGTTGAGGGCGGCTTGACGAGCCTCCTCTGTTAGTT  
21-9 ACTTAAACCTCGCTAGCTTTGCGCGACCTTGCATCACGGAGA  
21-10 CGACCGTGTCCAGTCCCAGGAATCCTTATTGCTAATAGACTTG  
21-11 GAGGTGACCCGGTATTGCATGGATTAGGCAGACATGTCAAT  
21-12 ACTAACCCGCTCACCTCCAAAGGGCATATCGTAGGAAGCGCC  
21-13 TTGATTCTTTATGTAGATTGTATAAGAGCACATTGGTGGGCT  
21-14 TCCCTGGACGATAAAGATGCTGTTGGGCACCAATAGGCGGGA  
21-15 CCAGCATGCAAGTTTATTAGGCGGCACCCGGAAGCACATTCT  
22-1 TCATAGAAGACGATGGGAAAGCCGTCTCGATGATGTACAACG  
22-2 AGTCGGCACCTTTAGCCTCGTTTGCCAGCCAGGCAGTTTAAG  
22-3 ATTAGATCTGGTGGTTACTGTGTACGAACGGTAGCTCGGGCC  
22-4 GCCCGGGTTACCTTCCAGGGTTAGCGCCTGCTATAAGCCGCT  
22-5 ACTGGCCTTGCCGACTATTTCTAGCACTCAATCGAGTTGGTT  
22-6 TTACCGGGCGACTATCTCCGGAATATGCCATAGACATTCCTACA  
22-7 AATTATCGGGAACAAACAGAGGAGATAGGACCACCACTCTTT  
22-8 GAGGCTCGTCTCTCCGTGATGCACCTAGGTTCGAGAACCCGC  
22-9 CAAGGTGCGCAAGTCTATTATACAAAGAGGAATCAGTAATT  
22-10 GCAATAAGGAATTGACATGTCTAGTGGATAATATGCTCTTTG  
22-11 TGCCTAATCCGGCGCTTCCTAACAGGCGACTAATGTATTTAC  
22-12 CGATATGCCAGCCCACCAATGATGTCAATTGTCCCACACGCA  
22-13 GTGCTCTTATTCCCGCTATTTGACTATAAGGATGTGATGCC  
22-14 GGTGCCAACAGAATGTGCTTCAGACCGTTCGCTGTACCCGT  
22-15 CCGGGTGCCGTTTTTTTTTTTTTCGCTGCACAATTTTTTTTTTTT  
23-1 ATCGAGACGGTTTTTTTTTTTTTAGAGTATACTTTTTTTTTTTT  
23-2 TGGCTGGCAACGTTGTACATCGTTGGACCGCGTCTACCTAGT  
23-3 CCGTTCGTACCTTAAACTGCCGTTTATCTATGGTATACGCTG

23-4 GCAGGCGCTAGGCCCGAGCTAACCCCTGACGAGACAAAAGCCCG  
23-5 TTGAGTGCTAAGCGGCTTATAAAGAGGGCGTGCCGAGGGCC  
23-6 TAGGCATATTAACCAACTCGAGTATACAACGTCTCCCAACCG  
23-7 GTCCTATCTCTGTAGAATGTCGACCGGTTATGCCGCTGAGGT  
23-8 GACCTAGGTGAAAGAGTGGTGTTCATTGTAGAATAAAGAAG  
23-9 CCTCTTTGTAGCGGGTTCTGCGTGACACGCAAGGAAGCTATC  
23-10 TTATCCACTAAATTACTGATTCAACGTGCGCACTAAGACCCA  
23-11 AGTCGCCTGTCAAAGAGCATACTCATAATCCAGTGATAAATC  
23-12 CAATGACATCGTAAATACATTCAACGCAGACAAGGGCTGTCA  
23-13 CTTATAGTCATGCGTGTGGGAGATTAATGACGGAGGTGCTTG  
23-14 GAACGGTCTGGGCATCACATCTTGATACTGTTTAAACCCACG  
23-15 TTGTGCAGCGACGGGTACAGCCTAACTTCCTAAGTAAACCTG  
24-1 GTATACTCTAACTAGGTAGACCCGTGGTTCGAGTCCGGGAAGT  
24-2 GCGGTCCAACCAGCGTATACCATTATGCCCTTTATGGAGTTA  
24-3 ATAGATAAACCGGGCTTTGTTCATTACCTCGGTGACGGAATAG  
24-4 TCGTCAGGGTGGCCCTGCGGCAGTCCCAGTATCGCGGTTTA  
24-5 ACGCCCTCTTCGGTTGGGAGAATTGGCTATGTGCACAATCTG  
24-6 CGTTGTATACACCTCAGCGGCTGGTTGAGAGGGTCCAGGGCC  
24-7 ATAACCGGTCCCTTCTTTATTCATGGTATATGTTCTGTTTAT  
24-8 TACAATGGAAGATAGCTTCCTACACTAAGCTTGAGGAAGGGC  
24-9 TGCGTGTCACTGGGTCTTAGTGCACGCCCAAGTAAGGATTTA  
24-10 GCGCACGTTGGATTTATCACTTTTCGAGAGATACTTTAACATC  
24-11 GGATTATGAGTGACAGCCCTTGATCCAGCAAGCAAGCGCTAA  
24-12 GTCTGCGTTGCAAGCACCTCCGTGCACCAGTTGAAACTACCT  
24-13 GTCATTAATCCGTGGGTTTTAAATGTTTGATTTCAATTTGCGTC  
24-14 ACAGTATCAACAGGTTTACTTCAAGGGCCTTTAGTCAGCTAA  
24-15 AGGAAGTTAGTTTTTTTTTTTTTTGAAGAGGTACTTTTTTTTTTTT  
25-1 TCGACCACGGTTTTTTTTTTTTT  
25-2 AGGGCATAATACTTCCCGGAC  
25-3 CCGAGGTAATTAACCTCCATAA  
25-4 ACTCGGGACTCTATTCCGTCA  
25-5 CATAGCCAATTAACCGCGAT  
25-6 CTCTCAACCACAGATTGTGCA  
25-7 CATATACCATGGCCCTGGACC  
25-8 AGCTTAGTGTATAAACAGGAA  
25-9 TTGGGCGTGCGCCCTTCCTCA  
25-10 ATCTCTCGAATAAATCCTTAC  
25-11 TTGCTGGATCGATGTTAAAGT  
25-12 ACTGGTGCACCTTAGCGCTTGC  
25-13 AATCAAACATAGGTAGTTTCA  
25-14 AAGGCCCTTGGACGCAAATGA  
25-15 GTACCTCTTCTTAGCTGACTA

Motif 11.1 (24H×29T)

| Name | Sequence                                                               |
|------|------------------------------------------------------------------------|
| 1-1  | TCCGCCGTCCGGCTCTCGGGA                                                  |
| 1-2  | ACTTGTACCAAGAGGCCAGTG                                                  |
| 1-3  | GTCTGTGCCCTAGCTGCATCG                                                  |
| 1-4  | CGTAGACGTTAAGACCTCGGA                                                  |
| 1-5  | AGGTGGTTTATACGGACTGTA                                                  |
| 1-6  | GGACTATGCGTTTAATACCCA                                                  |
| 1-7  | GTGTAATCTTAGAAGGAGTCA                                                  |
| 1-8  | CGTTCCTAAAGCGCGGATTTA                                                  |
| 1-9  | TGTAACACGACTGGAGACTTT                                                  |
| 1-10 | AGGTTTGTACGTGCGTAGCCT                                                  |
| 1-11 | CACGTATCAAGTAGTCGACTC                                                  |
| 1-12 | ACTGTAACCCATGCAATGGTC                                                  |
| 1-13 | TGCATAGGGCCAGGGTCGCTA                                                  |
| 1-14 | GAACACATTCTAAATAGAATC                                                  |
| 1-15 | TTTTTTTTTTTTCCATGAACCT                                                 |
| 2-1  | TTTTTTTTTTTGCCCAATGCGTTTTTTTTTTTTTTTTTTTTTTTTTTTCCGACGGCGGATTTTTTTTTTT |
| 2-2  | GTGCAGCAAGTCCGTTAACCATTTTTTTTTTTTTTTTTTTTTTTTTTTTGGTACAAGTCCCGAGACG    |
| 2-3  | GAATGAACTAGGGATAATAAGTTTTTTTTTTTTTTTTTTTTTTTTTTTAGGGCACAGACCACTGGCCTC  |
| 2-4  | ACCGACTAAATGATTGAGTCCTTTTTTTTTTTTTTTTTTTTTTTTTTAACGTCTACGCGATGCAGCT    |
| 2-5  | TACAAAGTTCAACCATAGACGTTTTTTTTTTTTTTTTTTTTTTTTTATAAACACCTTCCGAGGTCT     |
| 2-6  | TGGGATAGTAGACACCTGCCCTTTTTTTTTTTTTTTTTTTTTTTTTTACGCATAGTCCCTACAGTCCGT  |
| 2-7  | TTAGCTATTTAGTTCCGAGTTTTTTTTTTTTTTTTTTTTTTTTTTAAGATTACACTGGGTATTAA      |
| 2-8  | GAAAGAAGTGGGCCGTTGAAGTTTTTTTTTTTTTTTTTTTTTTTTCTTTAGGAACGTGACTCCCTC     |
| 2-9  | TCTGAATATATTTGACTTATTTTTTTTTTTTTTTTTTTTTTTTTTGTCTGTACATAAAATCCGGC      |
| 2-10 | TTACAGTTCGCATATAAAGGCTTTTTTTTTTTTTTTTTTTTTTTTTTCGTACAAACCTAAAGTCTCCA   |
| 2-11 | ATGACGTCACTTTCGTGCGCTTTTTTTTTTTTTTTTTTTTTTTTTCTTGATACGTGAGGCTACGCA     |
| 2-12 | TAGCCCGACGTTCCATTACAATTTTTTTTTTTTTTTTTTTTTTTTTTGGGTTACAGTGAGTCGACTA    |
| 2-13 | GAACTCCTTAGCACCCAACGCTTTTTTTTTTTTTTTTTTTTTTTTTTGGCCCTATGCAGACCATTGCA   |
| 2-14 | TCAGCTACAAAGTCAGGGAGTTTTTTTTTTTTTTTTTTTTTTTTTTAGAATGTGTTCTAGCGACCCT    |
| 2-15 | TAAGCCGTGATGTGGTCGAGATTTTTTTTTTTTTTTTTTTTTTTTTTAATATATCTATGATTCATTT    |
| 3-1  | AGTTATCCCTCATCGGTTACTTTTTTTTTTTTTTTTTTTTTTTTTCTTGCTGCACACGCATTGGGC     |
| 3-2  | TAGAAGGGCCCTCAAGATGCATTTTTTTTTTTTTTTTTTTTTTTTTTAGTTCATTCGGTTAACGGA     |
| 3-3  | ATGCGGGCCTAGCATGTAAGCTTTTTTTTTTTTTTTTTTTTTTTTTTTAGTCGGTCTTATTATCCC     |
| 3-4  | TCCGTAATTTAGTTTAGGACTTTTTTTTTTTTTTTTTTTTTTTTTTGAACTTGTAGGACTCAATCA     |
| 3-5  | GTTTACTGCACCAACTTGAAGTTTTTTTTTTTTTTTTTTTTTTTTTACTATCCCACGTCATGGTT      |
| 3-6  | ACTCGCAGCACCCGTGGAGTTTTTTTTTTTTTTTTTTTTTTTTTAAATAGCTAAGGGCAGGTGTC      |
| 3-7  | TAAAGGGCAGCCCTTGTTTCATTTTTTTTTTTTTTTTTTTTTTTTTTCAGTTCCTTCAACTCCGAAC    |
| 3-8  | TTTAAAGCCCGGTGCTTGCGCTTTTTTTTTTTTTTTTTTTTTTTTTTATATTCAGACTTCAACGGCC    |
| 3-9  | GGAATTGTCATGGTGAAGTCCGTTTTTTTTTTTTTTTTTTTTTTTTTCGAACTGTAAATAAGTCGAAA   |

3-10 CCATGATCTAGGGCGCCAGTGTTTTTTTTTTTTTTTTTTTTTTTTTTTG TGACGTCATGCCTTTATATG  
3-11 TGCGGTTGCTGCCTAAGTTCATTTTTTTTTTTTTTTTTTTTTTTTCGTCGGGCTACGCGCACGAAA  
3-12 CTAGATAGGATCGTCCGTGACTTTTTTTTTTTTTTTTTTTTTTTTAAGGAGTTCCTTGTAATGGAA  
3-13 ACCCTAAATAAGTCGTGCCGCTTTTTTTTTTTTTTTTTTTTTTTGTAGCTGAGCGTTGGGTGC  
3-14 TTCAACAATTTATGGGAGACTTTTTTTTTTTTTTTTTTTTTTTTCACGGCTTAACTCCCTGACT  
3-15 GTAACATGTCTTTTTTTTTTTTTTTTTTTTTTTTTTTTTTTTTTTTTTTCTCGACCACA  
4-1 TTTTTTTTTTCACGTGGGCATTTTTTTTTTTTTTTTTTTTTTTTGAGGGATAACTTTTTTTTTTTT  
4-2 CGAGTCCGCGAGGTCCGAATCTTTTTTTTTTTTTTTTTTTTTTTGGGCCCTCTAAGTAACCGAT  
4-3 CGCGCCAACGGGTGGAGCTGTTTTTTTTTTTTTTTTTTTTTTTAGGCCCGCATTCATCTTGA  
4-4 CCATCGCGCCCTAAGTGTATGTTTTTTTTTTTTTTTTTTTTTTAAATTTACGGAGCTTACATGC  
4-5 GGTACCGGACCGTGGTCACCGTTTTTTTTTTTTTTTTTTTTTTGTGCAGTAAACGTCCTAAACT  
4-6 AGGTAATCTAATAGCAGCAGTTTTTTTTTTTTTTTTTTTTTTGTGCTGCGAGTCTTCAAGTTG  
4-7 GCGGCTCTAAGCTCTTTGGCGTTTTTTTTTTTTTTTTTTTTTTGCTGCCCTTAAACTCCACGG  
4-8 CCAAAGGAATCTCGCTTCATATTTTTTTTTTTTTTTTTTTTTTTCCGGGCTTAAATGAAACAAGG  
4-9 GAGTCTTATCATGTTTGACGCTTTTTTTTTTTTTTTTTTTTTTTATGACAATTCACGCGCAAGCA  
4-10 CGGACGTGAATTTCTCGGAGATTTTTTTTTTTTTTTTTTTTTTTCTAGATCATGGCGGACTCACC  
4-11 TAACTACTACTAGGAGTCGAATTTTTTTTTTTTTTTTTTTTTTTTCAGCAACCGCACACTGGCGCC  
4-12 GGATGGAAAGTCTTCCCTTGGTTTTTTTTTTTTTTTTTTTTTTATCCTATCTAGTGAACCTTAGG  
4-13 GTGGAAACTCCCTCTGACTTATTTTTTTTTTTTTTTTTTTTTTTATTTAGGGTGTACGGACG  
4-14 AGGAAACTCGAAAGGATAGTTTTTTTTTTTTTTTTTTTTTTAAATTGTTGAAGCGGCACGAC  
4-15 GTAACCTACTCGTTCAAGATATTTTTTTTTTTTTTTTTTTTTTTAGACATGTTACAGTCTCCCAT  
5-1 ACATAGCGAGTCAAACGGTGATTTTTTTTTTTTTTTTTTTTTTTTCGCGGACTCGATGCCACGTCG  
5-2 ATGGGCGGGCCGGTCACAAGTTTTTTTTTTTTTTTTTTTTTTTCGTTGGCGGGATTCGGACCT  
5-3 CCGGAGCCCTAAGTCCGAGTTTTTTTTTTTTTTTTTTTTTTTGGCGGATGGACAGCTCCACC  
5-4 AAGGATCTGGAGGAAGTTCATTTTTTTTTTTTTTTTTTTTTTTGTCCGGTACCCATACACTTAG  
5-5 TTAGGGAAATAAAGGATTGACTTTTTTTTTTTTTTTTTTTTTTTTAGATTACCTCGGTGACCACG  
5-6 TCAGCGCTTCAAGCCCTGGGTTTTTTTTTTTTTTTTTTTTTTTAGAGCCGCACTGCTGCTAT  
5-7 AGAGTTACATCCTCCTCTTGTTTTTTTTTTTTTTTTTTTTTTTATCCTTTGGCGCCAAAGAGC  
5-8 TCGAATCACCGATACGCGCATTTTTTTTTTTTTTTTTTTTTTTGATAAGACTCTATGAAGCGAG  
5-9 AACGTTGGTATGGGTGACTTATTTTTTTTTTTTTTTTTTTTTTTTACGTCGGGCGTCAAACAT  
5-10 TGCGCCTTATCAAATTACCGCTTTTTTTTTTTTTTTTTTTTTTTGTAGTAGTTATCTCCGAAGAA  
5-11 ACCGAATGCCCTTCTACATTGTTTTTTTTTTTTTTTTTTTTTTCTTTCCATCCTTCGACTCCTA  
5-12 ACAGATGGGTACCGACACGGCTTTTTTTTTTTTTTTTTTTTTTTGAGTTCCACCCAAGGGAAGA  
5-13 GGGCCGATCAATGCGAGCGAATTTTTTTTTTTTTTTTTTTTTTTTCGAGTTCCCTTAAAGTCAGAGG  
5-14 TCTAAACTTTATCGGAGGAGCTTTTTTTTTTTTTTTTTTTTTTTAGTAGGTTACACCTATCCTTT  
5-15 GCAGTTTACGGTTTTTTTTTTTTTTTTTTTTTTTTTTTTTTTTTTTTTTTATCTTGAACG  
6-1 TTTTTTTTTTGTATCTGCACATTTTTTTTTTTTTTTTTTTTTTTACTCGCTATGTTTTTTTTTTTT  
6-2 CCGCATGATCCGCAAGAGCTTTTTTTTTTTTTTTTTTTTTTTGGCCCGCCATTCACCGTTTG  
6-3 AGTGCTTATGACCCTAAATTGTTTTTTTTTTTTTTTTTTTTTTTAGGGCTCCGGACTTGTGACC  
6-4 CGTCAGAAAGATAAAGAGGGCTTTTTTTTTTTTTTTTTTTTTTTCCAGATCCTTACCTCGGACT  
6-5 CATAACGCTGTCCCTAACGTTATTTTTTTTTTTTTTTTTTTTTTTATTTCCCTAATGGAACCTCC  
6-6 GCCAATCCAGGTTTAAAGAGATTTTTTTTTTTTTTTTTTTTTTTTGAAGCGCTGAGTCAATCCTT

6-7 ACCTCTGCCATCGAGCATGCCTTTTTTTTTTTTTTTTTTTTTTTTGGATGTAACCTACCCAGGGCT  
6-8 GGACCGTCGAGCCGATTCACCTTTTTTTTTTTTTTTTTTTTTTTCGGTGATTCGAACAAGAGGAG  
6-9 ATTCCACTTCCACATTTGATTTTTTTTTTTTTTTTTTTTTTTTATAACCAACGTTATGCGCGTAT  
6-10 CTTTCGGAGGGCCAGGATGAGCTTTTTTTTTTTTTTTTTTTTTTTGATAAGGCGCATAAGTCACCC  
6-11 TGACAGAGACAGGTAACGCTTTTTTTTTTTTTTTTTTTTTTTGGGCATTCGGTGCGGTAATTT  
6-12 CCTGGCCGCCCTGTTAATATGTTTTTTTTTTTTTTTTTTTTTTTACCCATCTGTCAATGTAGAA  
6-13 CGTCTCAGCGAGATTAATAATTTTTTTTTTTTTTTTTTTTTTTTGATCGGCCCGCCGTGTCCG  
6-14 TCCATTGCGACAAGGGCGTGCTTTTTTTTTTTTTTTTTTTTTTTAAAGTTTAGATTCGCTCGCA  
6-15 GCCTCTATCTGGTTAACTGGGTTTTTTTTTTTTTTTTTTTTTTCCGTAAACTGCGCTCCTCCGA  
7-1 TATTTGGCATCTGACTATAGGTTTTTTTTTTTTTTTTTTTTTTGATCATGCGGTGTGCAGATAC  
7-2 GTACGCCCTGACCCACCGATGTTTTTTTTTTTTTTTTTTTTTTTCATAAGCACTAAGCTCTTGCG  
7-3 GTTAAAGGCGTTCGCGAAAATTTTTTTTTTTTTTTTTTTTTTTCTTTCTGACGCAATTTAGGGT  
7-4 CCTTTGACTTTCACTGAACAGTTTTTTTTTTTTTTTTTTTTTTTACAGCGTATGGCCCTCTTTAT  
7-5 GCCCTGACGGGAGCTGCGGGCTTTTTTTTTTTTTTTTTTTTTTTCTGGATTGGCTAACGTTAGGG  
7-6 GACGTTGAATTAAGTCAATCTTTTTTTTTTTTTTTTTTTTTTTTGGCAGAGTTCTCTTTAAAC  
7-7 TATGACTTTATAAAGGTGTGTTTTTTTTTTTTTTTTTTTTTTTCGACGGTCCGGCATGCTCGA  
7-8 ACATCTCTAGGGCCCTGGATGTTTTTTTTTTTTTTTTTTTTTTGAAGTGAATGGTGAATCGGC  
7-9 GTCAGCAGGCAATCTGCCCGATTTTTTTTTTTTTTTTTTTTTTTCCCTCCGAAGAATCAAATGTG  
7-10 TCGGCTCTAAGCAGCGTTTACTTTTTTTTTTTTTTTTTTTTTTTGTCTCTGTCAGCTCATCCTGG  
7-11 CGATGTTGTTTGTGGTACTCTTTTTTTTTTTTTTTTTTTTTTTTGGCGGCCAGGGCGTAGTACCT  
7-12 ATACACAATCCCTAAGAGTCTTTTTTTTTTTTTTTTTTTTTTTTCGCTGAGACGCATATTAACAG  
7-13 TGTGTACTGAGAATAGGTCCATTTTTTTTTTTTTTTTTTTTTTTTCGCAATGGATAATTTAATCT  
7-14 CACCTTATTACACACCCGGTTTTTTTTTTTTTTTTTTTTTTTATAGATAGAGGCGCACGCCCTTG  
7-15 ATGAACATTAATTTTTTTTTTTTTTTTTTTTTTTTTTTTTTTTTTTTTTTTCCAGTTAACC  
8-1 TTTTTTTTTTACAGAAAGGTCTTTTTTTTTTTTTTTTTTTTTTTGATGCCAAATATTTTTTTTTTT  
8-2 TGGCGGTTGGATTAATTAGGCTTTTTTTTTTTTTTTTTTTTTTTTCAGGGCGTACCCTATAGTCA  
8-3 AATCCCTGTGGCTACCGAGGCTTTTTTTTTTTTTTTTTTTTTTTACGCCTTAACCATCGGTGGG  
8-4 AACTGAAGCGGCTTGGCCACTTTTTTTTTTTTTTTTTTTTTTTTAAAGTCAAAGGAATTCGCGA  
8-5 ACCGTGACGCAACTAAACAATTTTTTTTTTTTTTTTTTTTTTTCCCGTCAGGGCTGTTCACTG  
8-6 GGACTCTATCCCTACGGAACCTTTTTTTTTTTTTTTTTTTTTTTAATTCAACGTCGCCCGCAGCT  
8-7 TTTTCATCTTCCATTAGTTGCCTTTTTTTTTTTTTTTTTTTTTTATAAAGTCATAAGATTGACTT  
8-8 CGTGGGTGTTGGGCAACACCGTTTTTTTTTTTTTTTTTTTTTTTCCCTAGAGATGTACACACCTTT  
8-9 GCCGAGGACGAGCAGACTTCTTTTTTTTTTTTTTTTTTTTTTTTGCTGCTGACCATCCAGGGC  
8-10 GAGCAAATGTTCCCGATGAACTTTTTTTTTTTTTTTTTTTTTTTCTTAGAGCCGATCGGGCAGAT  
8-11 GTTGGCGGTCAGCCATGGCTTTTTTTTTTTTTTTTTTTTTTTTAAACAACATCGGTAAACGCTG  
8-12 ACTGTCAACGGACAACGGACATTTTTTTTTTTTTTTTTTTTTTTGGATTGTGTATAGAGTACCAC  
8-13 CAAGCGTGGAAATCCGTCTGATTTTTTTTTTTTTTTTTTTTTTTCTCAGTACACAAGACTCTTAG  
8-14 GTATCAAAGCGGTCCAGACCTTTTTTTTTTTTTTTTTTTTTTTGTAATAAGGTGTGGACCTATT  
8-15 AGGAAAGCTAGTGGTCCGCGTTTTTTTTTTTTTTTTTTTTTTTAAATGTTTATAACCGGGTGT  
9-1 GGGACCTTCACTAACGACCATTTTTTTTTTTTTTTTTTTTTTTCCAACCGCCAGACCTTCTGT  
9-2 GCCTGATATTGCAATCACTCCTTTTTTTTTTTTTTTTTTTTTTTTACAGGGATTGCCTAATTAAT  
9-3 GGGTACCGACTCCCTTTACGGTTTTTTTTTTTTTTTTTTTTTTTCGCTTCAGTTGCCTCGGTAGC

9-4 CTTCCGAGAAGTCATTTGGAATTTTTTTTTTTTTTTTTTTTTTTTTTTTGGCGTCACGGTAGTGGCCAAGC  
9-5 GTCTCAGGCGCTTGAGAATGATTTTTTTTTTTTTTTTTTTTTTTTTTTGATAGAGTCCATTGTTTAGTT  
9-6 TCGAACACTTCCGTTGCGTTTTTTTTTTTTTTTTTTTTTTTTTTTGAAGATGAAAGGTTCCGTAGG  
9-7 GGCACATTACGGCTAGGAACTTTTTTTTTTTTTTTTTTTTTTTTAAACACCACGGGCAACTAATG  
9-8 GCTCGCCAGTCGGACCTCGCCTTTTTTTTTTTTTTTTTTTTTTTTCGTCTCGGCCGGTGTGCCC  
9-9 GCATCCATGAGCGCTGGGAGATTTTTTTTTTTTTTTTTTTTTTTTACATTTGCTCGAAAAGTCTGCT  
9-10 TCTAACTTAAGCGATTAGGGTTTTTTTTTTTTTTTTTTTTTTTGACCGCCAACGTTTCATCGGGA  
9-11 GGTGATTCGCAAGGGCCGATATTTTTTTTTTTTTTTTTTTTTTTTCGTTGACAGTAAGCCATGGCT  
9-12 CTCGTTTGTCTAATAGCAAGTTTTTTTTTTTTTTTTTTTTTTTCCACGCTTGTGTCCGTTGTC  
9-13 CGCATGGGAATGCCCTGCGTCTTTTTTTTTTTTTTTTTTTTTTTGCTTTGATACTCAGACGGATT  
9-14 GTGTGATTCTTCACCTGTACTTTTTTTTTTTTTTTTTTTTTTTTAGCTTTCCTGGGTCTGGACC  
9-15 GGACCTGGGCATTTTTTTTTTTTTTTTTTTTTTTTTTTTTTTTTTTTACGCGGACCAC  
10-1 TTTTTTTTTTTCACATAGGCCGTTTTTTTTTTTTTTTTTTTTTTTGAAGGTCCCTTTTTTTTTTT  
10-2 CCCACCTAGAAGAAGAAAGGGTTTTTTTTTTTTTTTTTTTTTTCAATATCAGGCTGGTCGTTAG  
10-3 TAGAACTGAGAGACAGGGCTATTTTTTTTTTTTTTTTTTTTTTTAGTCGGTACCCGGAGTGATTG  
10-4 TATAGCGCGTCTGTGGCGGATTTTTTTTTTTTTTTTTTTTTTTCTTCTCGGAAGCCGTAAAGGG  
10-5 CTGGCGGTACCATAAACTCGCTTTTTTTTTTTTTTTTTTTTTTTGCGCCTGAGACTTCCAAATGA  
10-6 ATTTCCCTGACCTTGAGGGAGTTTTTTTTTTTTTTTTTTTTTTGAAGTGTCGATCATCTCAA  
10-7 AACACAGCGATCACGTGCCCTTTTTTTTTTTTTTTTTTTTTTTGTGAATGTGCCAAACGCAACG  
10-8 GGGCCTGAGTGGTCCCGCCAGTTTTTTTTTTTTTTTTTTTTTTGACTGGCGAGCGTTCCTAGCC  
10-9 GTGCCTAGCTTCGGCATCCACTTTTTTTTTTTTTTTTTTTTTTTCTCATGGATGCGGCGAGGTCC  
10-10 AGTACTTACTGTTGACCAGGCTTTTTTTTTTTTTTTTTTTTTTTCTTAAGTTAGATCTCCCAGCG  
10-11 TTCTTCATTGTTCTTGAGCATTTTTTTTTTTTTTTTTTTTTTTTGCGAATCACCACCCTAATCG  
10-12 GCATTGCAACGTATCATAAACTTTTTTTTTTTTTTTTTTTTTTTTAGACAAACGAGTATCGGCCCT  
10-13 GCGGAAAGCGGAAATTTAGTGTTTTTTTTTTTTTTTTTTTTTTATCCCATGCGACTTGCTATT  
10-14 AATCCGTGAGTAACCATGACTTTTTTTTTTTTTTTTTTTTTTTAAGAATCACACGACGCAGGGC  
10-15 GGCACGTTTCATCGCCCGCTTTTTTTTTTTTTTTTTTTTTTTTGCCAGGTCCAGTACAGGTG  
11-1 TTGTGATAGAAGTCCGAGTGTTTTTTTTTTTTTTTTTTTTTTTCTAGGTGGGCGGCCTATGTG  
11-2 TCCATCGTCTTTAGTGTATGGTTTTTTTTTTTTTTTTTTTTTTCTCAGTTCACCCTTCTTCT  
11-3 CTCGGCGAGCGCCAAAGAGGCTTTTTTTTTTTTTTTTTTTTTTTACGCGCTATATAGCCCTGTCT  
11-4 GACCCTCCGCATACCTTGGGATTTTTTTTTTTTTTTTTTTTTTTGTACCGCCAGTCGCGCCACAG  
11-5 CGAGTATAACCAATGACAAGTTTTTTTTTTTTTTTTTTTTTTTTCAGGGAAATGCGAGTTTATG  
11-6 GTAGGGCCGTCGAAAGATGGATTTTTTTTTTTTTTTTTTTTTTTTCGCTGTGTTCTCCCTCAAGG  
11-7 ATTCACAGCCAATTGTAATTTTTTTTTTTTTTTTTTTTTTTTACTCAGGCCCAGGGCACGTGA  
11-8 ACTCGGAAAGCAACTGCATTTTTTTTTTTTTTTTTTTTTTTTAGCTAGGCACCTGGCGGGACC  
11-9 GGTGAGTAACTCCCTCTGGATTTTTTTTTTTTTTTTTTTTTTTTAGTAAGTACTGTGGATGCCGA  
11-10 CTTTGAGAAATTTCTCGTAGCTTTTTTTTTTTTTTTTTTTTTTTCAATGAAGAAGCCTGGTCAAC  
11-11 GCGGAGACAAGACCGCGACCTTTTTTTTTTTTTTTTTTTTTTTGTTGCAATGCATGCTCAAGAA  
11-12 CAACAACACGTCTGTTCCGCGTTTTTTTTTTTTTTTTTTTTTTTCGCTTCCGCGTTTATGATAC  
11-13 ACAGAACTTTGTCAGCCCTTTTTTTTTTTTTTTTTTTTTTTTCTGACGGATTCACTAAATTTTC  
11-14 ACCGGACCTAATCCAGCGCCATTTTTTTTTTTTTTTTTTTTTTTTGAACGTGCCAGTCATGGTTA  
11-15 TTTACCATAGGTTTTTTTTTTTTTTTTTTTTTTTTTTTTTTTTTTTTTTTTTTTAAAGCCGGGCGA

12-1 TTTTTTTTTTACGGAAGCAAATTTTTTTTTTTTTTTTTTTTTTTTTTCTATCGACAATTTTTTTTTTT  
12-2 GGTAGACAGTCATGCAAGATTTTTTTTTTTTTTTTTTTTTTTTTTAAGACGATGGACACTCGGACT  
12-3 CTTCAGGTCATACCTGTAGATTTTTTTTTTTTTTTTTTTTTTTTTTCGCTCGCCGAGCCATACACTA  
12-4 ATCTCTCGCGTATTTAGATTCTTTTTTTTTTTTTTTTTTTTTTTTTTGCGGAGGGTCGCCCTTTGG  
12-5 TCTGCTCCTTTCCGGGAGGGATTTTTTTTTTTTTTTTTTTTTTTTTTGGTTATACTCGTCCCAAGGTA  
12-6 GCTCTCGCCTCCTACAACGTTTTTTTTTTTTTTTTTTTTTTTTTGACGGCCCTACACTTGTCAAT  
12-7 AGCAGTGTAGCTTGACGCAGCTTTTTTTTTTTTTTTTTTTTTTTTTTGGCTGTGAATCCATCTTTC  
12-8 CCTCAATCCCTCTGCCTCCATTTTTTTTTTTTTTTTTTTTTTTTTTGCTTCCGAGTAAATTACAAT  
12-9 CGGCTATCTGGGCCTCCGTAGTTTTTTTTTTTTTTTTTTTTTTTTTAGTTACTCACCAAATGCAGTT  
12-10 ACATTCGGGATGCAGGCATGTTTTTTTTTTTTTTTTTTTTTTTTATTTCTCAAAGATCCAGAGGG  
12-11 ACCCTAATCCTCTTTTCGCCCTCTTTTTTTTTTTTTTTTTTTTTTTTTCTTGTCTCCGCGCTACGAAGA  
12-12 TCGTTACATACGCGGCGGTCTTTTTTTTTTTTTTTTTTTTTTTTTTACGTGTTGTTGAGGTCGCGGT  
12-13 ATCAGTAGAAGCTCGTACGGCTTTTTTTTTTTTTTTTTTTTTTTTTCAAAGTTCTGTCCGCGAACAG  
12-14 CCTAGAGCGAGGTCGTAGACCTTTTTTTTTTTTTTTTTTTTTTTTTTAGGTCCGGTAAAGGGCTGA  
12-15 GCGGATTGTGGCGCGACAAGATTTTTTTTTTTTTTTTTTTTTTTTTCCATAGGTAAATGGCGCTGGA  
13-1 GATCATCACCTCCAATCTATTTTTTTTTTTTTTTTTTTTTTTTTACTGTCTACCTTTGCTTCCGT  
13-2 TTAAAGGAAACGAATAACAATTTTTTTTTTTTTTTTTTTTTTTTTTGACCTGAAGAATCTTGCATG  
13-3 GGTTCCTCGTTGCTGCTTTTTTTTTTTTTTTTTTTTTTTTTTCGCGAGAGATATCTACAGGTA  
13-4 GGTAAAGGGCAGCAATGAAAGTTTTTTTTTTTTTTTTTTTTTTAAGGAGCAGAGAATCTAAATA  
13-5 CTAAGTGCATCACAAGTCACTTTTTTTTTTTTTTTTTTTTTTTAGGCGAGAGCTCCCTCCCGGA  
13-6 CAAACCGCCAAGGTGCCGGCATTTTTTTTTTTTTTTTTTTTTTTCTACACTGCTAACGTTGTAGG  
13-7 AACGCCGTGCAGGGACCAATCTTTTTTTTTTTTTTTTTTTTTTTGGGATGAGGGCTGCGTCAAG  
13-8 TGTAGCTCCATGCTTCAAGAATTTTTTTTTTTTTTTTTTTTTTTCAGATAGCCGTGGGAGGCAGA  
13-9 TCTTCGATATTGTGGAACACTTTTTTTTTTTTTTTTTTTTTTTCCCGGAATGCTACGGAGGCC  
13-10 ATATTTATACCTGTTACAACCTTTTTTTTTTTTTTTTTTTTTTTGGATTAGGGTCATGCCCTGCAT  
13-11 CGAGACCGTCCGTTGGGTCTTTTTTTTTTTTTTTTTTTTTTTTTTATGTAACGAGAGGCGAAAGA  
13-12 ACACCTGAGAGAGATTGTATATTTTTTTTTTTTTTTTTTTTTTTCTACTGATAGACCGCCGCG  
13-13 CGCCACCCTATACCGAGAGGATTTTTTTTTTTTTTTTTTTTTTTTTTCGCTCTAGGGCCGTACGAGC  
13-14 GCTGGCTGGTCTCAACACTCCTTTTTTTTTTTTTTTTTTTTTTTTACAATCCGCGGTCTACGACC  
13-15 GTCTTCAGGTGTTTTTTTTTTTTTTTTTTTTTTTTTTTTTTTTTTTTTTCTTGTGCGCGC  
14-1 TTTTTTTTTTATGGCGGCTGTTTTTTTTTTTTTTTTTTTTTTTTTGGGTGATGATCTTTTTTTTTTT  
14-2 CTGTCAATTGGAGGCAACTTTATTTTTTTTTTTTTTTTTTTTTTTGTTTCCTTTAATAGGATTGGA  
14-3 GCTCCAGGGCCCGGTACCGCTTTTTTTTTTTTTTTTTTTTTTTACGAGGGAACCATTGTTATTC  
14-4 GGGCACAACCTTTGTTTCGTGTTTTTTTTTTTTTTTTTTTTTTTTTGGCCCTTACCAAAGCAGCGA  
14-5 TGAGTCCGAAGTACGAGCTATCTTTTTTTTTTTTTTTTTTTTTTTGACGCAGTTAGCTTTCATTGC  
14-6 CAGCGACTTCCCTCGTTCCTGTTTTTTTTTTTTTTTTTTTTTTTTTGGCGGTTTGATGACTTGT  
14-7 CGATCCCCTTTGGTATTGGCTTTTTTTTTTTTTTTTTTTTTTTGCACGGCGTTTGCAGGACCC  
14-8 ACACTCGCGTGTGATAGAAATTTTTTTTTTTTTTTTTTTTTTTATGGAGCTACAGATTGGTCCC  
14-9 ATGAAGTACAGAGGTAGACGCTTTTTTTTTTTTTTTTTTTTTTTAATATCGAAGATTCCTGAAGC  
14-10 ACGAGGTCCCTTCTTCTACCTTTTTTTTTTTTTTTTTTTTTTTGGTATAAATATAGTGTCCAC  
14-11 GCTAGCCTCAGCTATTTACATTTTTTTTTTTTTTTTTTTTTTTGGACGGTCTCGGGTTGTAACA  
14-12 GTGGCTTCGCCGAGTATCCCTTTTTTTTTTTTTTTTTTTTTTTCTCTCAGGTGTAAGACCCAAC

14-13 TACAGCGCGTAGCGGATGGAGTTTTTTTTTTTTTTTTTTTTTTATAGGGTGGCGTATACAATCT  
14-14 GCTGATACAATTCCCTGTACATTTTTTTTTTTTTTTTTTTTTTGACCAGCCAGCTCCTCTCGGT  
14-15 TAAAGCTCACGATTCCGGTCGTTTTTTTTTTTTTTTTTTTTTCCACCTGAAGACGGAGTGTGA  
15-1 CAGCGCGCCAACCACGGGTAGTTTTTTTTTTTTTTTTTTTTTCCAATGACAGACAGCCGCCAT  
15-2 GGTGTGTCCATTAATATGTTATTTTTTTTTTTTTTTTTTTTTTGCCCTGGAGCTAAAGTTGCCT  
15-3 GAAACCGAGCCAGGTGGAGCTTTTTTTTTTTTTTTTTTTTTTAGTTGTGCCCAGCGGTACCGG  
15-4 TATATCGGACGCGCACGGCTATTTTTTTTTTTTTTTTTTTTTTTCGGACTCAACACGAAACAA  
15-5 ACTCGAGGGCTTTAAAGATTTTTTTTTTTTTTTTTTTTTTTGAAGTCGCTGGATAGGCTCAG  
15-6 CCTATCCGCCATGAAGTTGTGTTTTTTTTTTTTTTTTTTTTTAGTGGGATCGACAGGAACGAG  
15-7 CGTACGGCTCACAACTTCACTTTTTTTTTTTTTTTTTTTTTTACGCGAGTGTGCCAATACCAA  
15-8 TTTGGGCCGATTCTTAAACGGTTTTTTTTTTTTTTTTTTTTTTGTACTTCATATTTCTATCAC  
15-9 AGACCTCCATATATGCTGTACTTTTTTTTTTTTTTTTTTTTTTGGGACCTCGTGCGTCTACCTC  
15-10 CAAGGCGCTTGTGTTGAAAGTGTTTTTTTTTTTTTTTTTTTTTTTGAGGCTAGCGGTAGAAGAAA  
15-11 GAGTCGACCCTGTGCGCGGTGTTTTTTTTTTTTTTTTTTTTTTTGCGAAGCCACATGTAAATAGC  
15-12 TCGGATATCGTTGGGTTTAGATTTTTTTTTTTTTTTTTTTTTTTACGCGCTGTAAGGGATACTCG  
15-13 TTTAATAGTTAAGGTACATTTGTTTTTTTTTTTTTTTTTTTTTTGTATCAGCCTCCATCCGCT  
15-14 AATTCAGGGCTAACTTTCCAATTTTTTTTTTTTTTTTTTTTTTTGTGAGCTTTATGTACAGGGAA  
15-15 CTGAACTTGCTTTTTTTTTTTTTTTTTTTTTTTTTTTTTTTTTTTTCGACCAGGAATC  
16-1 TTTTTTTTTTTCGAAAGGGCATTTTTTTTTTTTTTTTTTTTTTTGGCGCGCTGTTTTTTTTTTT  
16-2 TAACAATGTATAACATGCTTTTTTTTTTTTTTTTTTTTTTTTATGGACACACCCTACCCGTGG  
16-3 GTGGCTTCGACAAATTCCTTGCTTTTTTTTTTTTTTTTTTTTTTTGGCTCGGTTTCTAACATATTA  
16-4 CACGATGCATCGCTTGGTATTTTTTTTTTTTTTTTTTTTTTTTCGTCCGATATAGCTCCACCTG  
16-5 GTAGGTGCTCAGTAGCCATTCTTTTTTTTTTTTTTTTTTTTTTTAGCCCTCGAGTTAGCCGTGCG  
16-6 CATATCGGAAGAATTCTATAATTTTTTTTTTTTTTTTTTTTTTTGGCGGATAGGAAATCTTTAA  
16-7 GTAGGTGAGAAAGCGGGCTCGTTTTTTTTTTTTTTTTTTTTTTGAGCCGTACGCACAACCTCA  
16-8 TTGAAATCTGGTTCGCCGAATTTTTTTTTTTTTTTTTTTTTTTATCGGCCCAAAGTGAAGTTTG  
16-9 CGGACCCAATGGAGATCTTCGTTTTTTTTTTTTTTTTTTTTTTTATGGAGGTCTCCGTTAAGA  
16-10 AAGCCTAACCTTATCTCATTATTTTTTTTTTTTTTTTTTTTTTTCAAGCGCCTTGGTACAGCATA  
16-11 GCTAGCGTGA CTCAA CTCCCTTTTTTTTTTTTTTTTTTTTTTTAGGGTCGACTCCACTTTCAA  
16-12 TTAATGTTGTTGCTCTGCATTTTTTTTTTTTTTTTTTTTTTTACGATATCCGACACCGGCAGC  
16-13 CATTACCGCGTTAATAACCGCTTTTTTTTTTTTTTTTTTTTTTTAACTATTAATCTAAACCCA  
16-14 TCTTCTTGACTTAGCATGACTTTTTTTTTTTTTTTTTTTTTTTAGCCCTGAATCAATGTACCT  
16-15 CCTGCCAACTAATTGGATAACTTTTTTTTTTTTTTTTTTTTTTTAGCAAGTTCAGTTGAAAAGTT  
17-1 ACATATATCCGATCCAAGCGCTTTTTTTTTTTTTTTTTTTTTTTACATTGTTATGCCCTTTCGC  
17-2 CTTTGCGGGACTCCGCTAGAGTTTTTTTTTTTTTTTTTTTTTTTCGAAGCCACAAAGCATGTTA  
17-3 ACGTTGGTTTGGGCGTTCACCTTTTTTTTTTTTTTTTTTTTTTTATGCATCGTGGCAAGAATTTG  
17-4 TAGGCAGCACAATGACACTCTTTTTTTTTTTTTTTTTTTTTTTGAGCACCTACAATACCAAGCG  
17-5 CCAAGAGCGAGTGCAGTGTCATTTTTTTTTTTTTTTTTTTTTTCCGATATGGAATGGCTACT  
17-6 TTTCTCAACCTTGGCTTATGTTTTTTTTTTTTTTTTTTTTTTCTCACCTACTTATAGAATTC  
17-7 CGAGTTGTTGCTGCCTCATCTTTTTTTTTTTTTTTTTTTTTTTTCAGATTTCAACGAGCCCGCTT  
17-8 TTGGACCGGGACTTGGGTAATTTTTTTTTTTTTTTTTTTTTTTATGGGTCCGATTCGGCGAAC  
17-9 TCCTTAGCTGCAGTGAAAGTTTTTTTTTTTTTTTTTTTTTTTGGTTAGGCTTCGAAGATCTCC

17-10 TAAACTTTAGTCTTGGTCCCTTTTTTTTTTTTTTTTTTTTTTTTTTTTTTTTTTTCACGCTAGCTAATGAGATAA  
17-11 GTGTTTCGTCCCGTCTTTGAGTTTTTTTTTTTTTTTTTTTTTTTTTTTACAACATTAAGGGAGTTTGAG  
17-12 GGAGGTGATCTCATGTATCAGTTTTTTTTTTTTTTTTTTTTTTTTTTTCGCGGTAATGTGCAGAGGACA  
17-13 TGGTGCAAGGGATCTTTCACTTTTTTTTTTTTTTTTTTTTTTTTTTTCAAGAAAGAGCGGTATTAA  
17-14 CTTCATATAGGCCGTGACGGATTTTTTTTTTTTTTTTTTTTTTTTTTTAGTTGGCAGGGTCATGCTAAG  
17-15 TCCTACTGACGTTTTTTTTTTTTTTTTTTTTTTTTTTTTTTTTTTTTTTTTTTTGTATATCCAATT  
18-1 TTTTTTTTTTCCCCTCAGGGCTTTTTTTTTTTTTTTTTTTTTTTTTTTCGGATATATGTTTTTTTTTTTT  
18-2 TGCGGCTACCATATAAGATTTTTTTTTTTTTTTTTTTTTTTTTTTGTCCCGCAAAGGCGCTTGGAT  
18-3 AGCCTAAAGCCGAGTGATGGCTTTTTTTTTTTTTTTTTTTTTTTTTTCAAACCAACGTCTCTAGCGGA  
18-4 CCACTCCGTACCTGCCTTAATTTTTTTTTTTTTTTTTTTTTTTTTTTGTGCTGCC TAGGTGAACGCC  
18-5 TTCTGGGTGACAGGCCGTTCTTTTTTTTTTTTTTTTTTTTTTTTTTCTCGCTCTTGGGAGTGTCAAT  
18-6 AATCGCAACACCCGCTGGCACTTTTTTTTTTTTTTTTTTTTTTTTTTGGGTTGAGAAATGACACTGCA  
18-7 GGTGGGCGAATCCAGCAGAGATTTTTTTTTTTTTTTTTTTTTTTTTTGCACAACCTCGCATAAGCCAA  
18-8 CATGACTTGTCGTTGGCATCTTTTTTTTTTTTTTTTTTTTTTTTTTCCCGGTCCAAGGATGAGGCA  
18-9 ATGGCGGCCGCCCGGGCCTACTTTTTTTTTTTTTTTTTTTTTTTTTTGCAGCTAAGGAATTACCCAAG  
18-10 CCACGTATGCCGTAGGACATATTTTTTTTTTTTTTTTTTTTTTTTTTACTAAAAGTTTAAACTTTCACT  
18-11 GGTTCCTCGTACAGCCTCGCCTTTTTTTTTTTTTTTTTTTTTTTTTTGGACGAAACACAGGGACCAAG  
18-12 CAAATGCGTGAGGTGCGTCTTTTTTTTTTTTTTTTTTTTTTTTTTAGATCACCTCCCCTCAAAGACG  
18-13 TGTTAGTTAGCACGTGTCTCGTTTTTTTTTTTTTTTTTTTTTTTTTCCCTTGCACCACTGATACATG  
18-14 CCTCCGCTTGTCAAACCTATTTTTTTTTTTTTTTTTTTTTTTTTTCCCTATATGAAGAGTGAAGAT  
18-15 GCCAGATCATGCGGACAGATCTTTTTTTTTTTTTTTTTTTTTTTTTTTCGTCAGTAGGATCCGTCACGG  
19-1 CATCACTGCTACTTTCGACAACTTTTTTTTTTTTTTTTTTTTTTTTTTGGTAGCCGCAGCCCTGACGGG  
19-2 ACAGAGGAGCTTGCCTGATTTTTTTTTTTTTTTTTTTTTTTTTTGTCTTAGGCTAAATCTTATAT  
19-3 GCGTGGTCCGCCAAGCTATCTTTTTTTTTTTTTTTTTTTTTTTTTTACGGAGTGGGCCATCACTCG  
19-4 GCATTAAGGCCCGGCTGGGATTTTTTTTTTTTTTTTTTTTTTTTTTCAACCAGAAATTAAGGCAGG  
19-5 TAACTACCAATGACTTATAGCTTTTTTTTTTTTTTTTTTTTTTTTTTGTGCGATTAGAACGGCCTG  
19-6 GTACTACACATTACGAGAGCATTTTTTTTTTTTTTTTTTTTTTTTTTTCGCCACCGTGCCAGCGGG  
19-7 GGACAGCACAACACTACCATTTTTTTTTTTTTTTTTTTTTTTTTTACAAGTCATGTCTCTGCTGGA  
19-8 GCTGCTAGCATGCCGATTAATTTTTTTTTTTTTTTTTTTTTTTTTTTCGGCCGCCATGGATGCCAACG  
19-9 GTTTCGACTCCGGGTGCCTTTTTTTTTTTTTTTTTTTTTTTTTTGCATACGTGGGTAGGCCCGGG  
19-10 AATTTGATATATTAGGCCGGTTTTTTTTTTTTTTTTTTTTTTTTTTACGAAGAACCATATGCTCTACG  
19-11 AACAGAAAGTGATGTGTTAATTTTTTTTTTTTTTTTTTTTTTTTTTTCACGCATTTGGGCGAGGCTGT  
19-12 CTACGTCCGAAAGACGAGATCTTTTTTTTTTTTTTTTTTTTTTTTTTCTAATAACAGAGACGCACCT  
19-13 CCTCAGGGCCATGCATTTAAGTTTTTTTTTTTTTTTTTTTTTTTTTAAACGGAGGCGAGACACGTG  
19-14 ATTGTGACATGAGCGCCCGTTTTTTTTTTTTTTTTTTTTTTTTTATGATCTGGCTAGGGTTTGAC  
19-15 GAATTCATAAATTTTTTTTTTTTTTTTTTTTTTTTTTTTTTTTTTTTTTTTTTTTGTATCTGTCCGC  
20-1 TTTTTTTTTTATGTTCAAGTTTTTTTTTTTTTTTTTTTTTTTTTAGCAGTGATGTTTTTTTTTTTT  
20-2 AATCGGTTTATGTGCATAGATTTTTTTTTTTTTTTTTTTTTTTTTTAGCTCCTCTGTGTTGTGCAAG  
20-3 ATCTCCCATCTGGAGACCACTTTTTTTTTTTTTTTTTTTTTTTTTTTCGGACCACGCCATCAGGCGCA  
20-4 GGGAGCTTCTCAAGGAAACGTTTTTTTTTTTTTTTTTTTTTTTTTGGCCTTAATGCGATAGCTTGG  
20-5 CAGCCGAAACCTAGCCTTACATTTTTTTTTTTTTTTTTTTTTTTTTTATGGTAGTTATCCCAGCCGC  
20-6 AGCTAAAGCGTCCACCATTCGTTTTTTTTTTTTTTTTTTTTTTTTTATGTGTAGTACGCTATAAGTC

20-7 GCGTAGAATCGTTTCCTAAACTTTTTTTTTTTTTTTTTTTTTTTTTTTTTTTTTTTGTTGCTGTCCGTGCTCTCGTA  
20-8 GGCTACGCGTTTGGCCCTCGTTTTTTTTTTTTTTTTTTTTTTTTTTTTTATGCTAGCAGCAATGGTAGTG  
20-9 TCTACGCCCATGGCCCGAAGCTTTTTTTTTTTTTTTTTTTTTTTTTTTGGAGTGCAAACCTTAATCCGGC  
20-10 AATTCATGTTTCGGACCTTAAGTTTTTTTTTTTTTTTTTTTTTTTTTATATCAAATTAAGGCACCC  
20-11 GAACCGTATACGCCAGTTGAGTTTTTTTTTTTTTTTTTTTTTTTTTCACTTCTGTTCCCGGCCTAA  
20-12 TGCATTCTGGAGCAAGGACTCTTTTTTTTTTTTTTTTTTTTTTTTTTTCGGACGTAGATTAACACAT  
20-13 ACATAAGCCAAAGTGGGCTCATTTTTTTTTTTTTTTTTTTTTTTTTTTGGCCCTGAGGGATCTCGTCT  
20-14 TCGGAGGACCTCTTATGGGCTTTTTTTTTTTTTTTTTTTTTTTTTTCATGTCACAATCTTAAATGCA  
20-15 ATTTTCGAAAGCCTTAGAGTGCTTTTTTTTTTTTTTTTTTTTTTTATTTAGAATTCACCGGGCGCT  
21-1 ACGTCCTTGTCTGCGTAATTTTTTTTTTTTTTTTTTTTTTTTTTAAACCGATTAACCTGAACAT  
21-2 GTAGCGATGTAAACTGCAGCATTTTTTTTTTTTTTTTTTTTTTTGATGGGAGATATCTATGCACA  
21-3 TTCCCTACTCAACGGCTATCATTTTTTTTTTTTTTTTTTTTTTTAGAAAGCTCCCGTGGTCTCCAG  
21-4 TTAGGATGCGAACTCCACTCCTTTTTTTTTTTTTTTTTTTTTTTGTTTCGGCTGACGTTTCCTTG  
21-5 CGGAATATGAGCGCAGGGCGCTTTTTTTTTTTTTTTTTTTTTTTCGCTTAGCTTGTAAGGCTAG  
21-6 CCTACACTCTCTCGGGTCCATTTTTTTTTTTTTTTTTTTTTTTGATTCTACGCCGAATGGTGA  
21-7 TCGTGTGCATTTGAAGTCGCATTTTTTTTTTTTTTTTTTTTTTTACGCGTAGCCGTTTAGGAAAC  
21-8 GCTGTCTTAGGGTCCATAATGCTTTTTTTTTTTTTTTTTTTTTTTGGGCGTAGAACGAGGGCCAA  
21-9 GCGGACGGCTCAATGACTTATTTTTTTTTTTTTTTTTTTTTTTAACATGAATTGCTTCGGGCCA  
21-10 CTAGTTACGCAGAGAGATCAGTTTTTTTTTTTTTTTTTTTTTTATACGGTTCCTTAAGGTCCG  
21-11 CAGACGACCGTTGGCGTTGTTTTTTTTTTTTTTTTTTTTTTTCCAGAAATGCACTCAACTGGCG  
21-12 TCTGATCCTGTGCAAACCTATTTTTTTTTTTTTTTTTTTTTTTGGCTTATGTGAGTCCCTTGCT  
21-13 GCGTTACATAGTGGGCAGTCTTTTTTTTTTTTTTTTTTTTTTTGGTCCCTCCGATGAGCCCACCTT  
21-14 CCTGTGCGTAGGGTCTGCTTTTTTTTTTTTTTTTTTTTTTTCTTTCGAAATGCCATAAAGA  
21-15 AGTGTATCAGCTTTTTTTTTTTTTTTTTTTTTTTTTTTTTTTTTTTTTTTTTTTTGCACCTAAGG  
22-1 TTTTTTTTTTTCGGTTCGCTCCCTTTTTTTTTTTTTTTTTTTTTTTAACAAGGACGTTTTTTTTTTTT  
22-2 TACATAGCTAATGTGGCTAGGTTTTTTTTTTTTTTTTTTTTTTTACATCGCTACATTACGCAGA  
22-3 GCCGCAATGGTGGCGGTCGCTTTTTTTTTTTTTTTTTTTTTTTGAGTAGGGAATGCTGCAGTT  
22-4 ACTGACCTGGGCATGTGGGATTTTTTTTTTTTTTTTTTTTTTTTCGCATCCTAATGATAGCCGT  
22-5 AAGTTCAATTTATACCTCTAGTTTTTTTTTTTTTTTTTTTTTCTCATAATCCGGGAGTGGAGT  
22-6 GTAGCATGGCTGCTACTTCTCTTTTTTTTTTTTTTTTTTTTTTTGAGAGTGTAGGGCGCCCTGCG  
22-7 GGCCTACGATCCGGGCGTGGGTTTTTTTTTTTTTTTTTTTTTTAATGCACACGATAGGACCCGA  
22-8 ATCATGGGTATGTGTGCCAGTTTTTTTTTTTTTTTTTTTTTTTCCCTAAGACAGCTGCGACTTCA  
22-9 TTAGGACTCAATGCTTATATGTTTTTTTTTTTTTTTTTTTTTTGAGCCGTCCGCGCATTAGGAC  
22-10 GCCGAAGACGCCCGCAATCTCTTTTTTTTTTTTTTTTTTTTTTTGCGTAACTAGTAAGTCATTA  
22-11 CATGAGCGAGTGCAGTAAGCATTTTTTTTTTTTTTTTTTTTTTTACGGTCGCTGCTGATCTCTC  
22-12 ATATCTGCGTACACTTCGGAATTTTTTTTTTTTTTTTTTTTTTTACAGGATCAGAAACAACGCCA  
22-13 CTTACCGGTACGGGTATAAGTTTTTTTTTTTTTTTTTTTTTCTATGTAACGCATAAGTTTGC  
22-14 CCTGCCTAGATGTGCACTAGTTTTTTTTTTTTTTTTTTTTTTCTACCGACAGGAGACTGCCCA  
22-15 GTCCAGAGCATGGTCCATCCCTTTTTTTTTTTTTTTTTTTTTTTGCTGATACACTAAAGCAGACC  
23-1 TGGACTTCATTCAGAGCGTTATTTTTTTTTTTTTTTTTTTTTTTAGCTATGTAGGGAGCGACCG  
23-2 ACCTAATTTAGGCGGGCGGACTTTTTTTTTTTTTTTTTTTTTTTCCATTGCGGCCCTAGCCACAT  
23-3 GCATATCATGCTCGAGCGCTTTTTTTTTTTTTTTTTTTTTTTTCCAGGTCAGTGACGACCGCCA

23-4 ACGCGTTCCTTCTATAAAGTTATTTTTTTTTTTTTTTTTTTTTTTTTTTAATGAACTTATCCCACATGC  
23-5 GTGCCGTGGCCAGTTAAAGGCTTTTTTTTTTTTTTTTTTTTTTTGCCATGCTACCTAGAGGTATA  
23-6 GGGTAAGAGAGTGTTCGTAGTATTTTTTTTTTTTTTTTTTTTTTTATCGTAGGCCGAGAAGTAGCA  
23-7 TAAGTGACACTATTATTTAGTTTTTTTTTTTTTTTTTTTTTTTACCATGATCCCACGCCCGG  
23-8 AGGCTCCAGGTTATAAGGGATTTTTTTTTTTTTTTTTTTTTTTTGGAGTCCTAAACTGGCACACA  
23-9 GGGACCGAGTTGCTCCGATGTTTTTTTTTTTTTTTTTTTTTTTCGTCCTCGGCCATATAAGCAT  
23-10 TAGGGTTCATGGCAATGTTTCGTTTTTTTTTTTTTTTTTTTTTTCTCGCTCATGGAGATTGCGGG  
23-11 GAAGTTGAATTAATAATTCAATTTTTTTTTTTTTTTTTTTTTTTACGCAGATATTGCTTACTGCA  
23-12 TGACAAC TAAGCTTATGGAGGTTTTTTTTTTTTTTTTTTTTTTGACCGTAAGTCCGAAGTGT  
23-13 AATGTAATATGTTTAGCCTGATTTTTTTTTTTTTTTTTTTTTTTCTAGGCAGGCTTATACCCGT  
23-14 CCACTAGCTTTCTAAATGCGGTTTTTTTTTTTTTTTTTTTTTTTGGTCTGGACACTAGTGCACA  
23-15 GCAATGGATTATTTTTTTTTTTTTTTTTTTTTTTTTTTTTTTTTTTGGGATGGACCA  
24-1 TTTTTTTTTTATATGTCAGGATTTTTTTTTTTTTTTTTTTTTTTAATGAAGTCCATTTTTTTTTT  
24-2 ACACCCCTCTAAGGCGATCAGTTTTTTTTTTTTTTTTTTTTTTCTAAATTAGGTTAACGCTCTG  
24-3 CTTGCCTTGACAGTCAAACGTTTTTTTTTTTTTTTTTTTTTTGCATGATATGCGTCCGCCCGC  
24-4 CCGATGCCGTCGACCAGAGTCTTTTTTTTTTTTTTTTTTTTTTTAAGGAACGCGTAAGCGCTCGA  
24-5 TGGAGTGGCTAGTAGCCCGCATTTTTTTTTTTTTTTTTTTTTTTGGCCACGGCACTAACTTATAG  
24-6 GTTCGTCACTCGGTGCAAGGCTTTTTTTTTTTTTTTTTTTTTTTCTCTCTTACCCGCCTTAACT  
24-7 TTTGGCTCTACACATGTACCTTTTTTTTTTTTTTTTTTTTTTTAGTGTCACTTATACTACGACA  
24-8 GTGTATCCCAGGCCATCCTCGTTTTTTTTTTTTTTTTTTTTTTTACCTGGAGCCTACTAAATAAT  
24-9 TCTGATAGTACTGTCAACTCATTTTTTTTTTTTTTTTTTTTTTTAACTCGGTCCCATCCCTTATA  
24-10 CCTTATGACATCTCTACGTGTTTTTTTTTTTTTTTTTTTTTTTCATGAACCCTAACATCGGAGC  
24-11 ATCCTCGCAAACGTTCTAGCTTTTTTTTTTTTTTTTTTTTTTTAATTCAACTTCCGAACATTGC  
24-12 GATACTATGACATCTTCGACATTTTTTTTTTTTTTTTTTTTTTTCTTAGTTGTCATTGAATATTT  
24-13 ATACTACAGAGTACGGCGGCATTTTTTTTTTTTTTTTTTTTTTTTCATATTACATTCCTCCATAAG  
24-14 GCTCGATGCCTAGCCAATGCTTTTTTTTTTTTTTTTTTTTTTTTAAAGCTAGTGGTCAGGCTAAA  
24-15 GCTCGAATGAGGGCCCTCCGGTTTTTTTTTTTTTTTTTTTTTTTAAATCCATTGCCCGCATTTAG  
25-1 AAGAGGGTGTTCCTGACATAT  
25-2 GCAAGGCAAGCTGATCGCCTT  
25-3 ACGGCATCGGCGTTTACTGT  
25-4 AGCCACTCCAGACTCTGGTCG  
25-5 AGTGACGAACTGCGGGCTACT  
25-6 TAGAGCCAAAGCCTTCGACCG  
25-7 TGGGATACACAGGTACATGTG  
25-8 TACTATCAGACGAGGATGGCC  
25-9 TGTCATAAGGTGAGTTGACAG  
25-10 TTGCGAGGATACACGTAGAGA  
25-11 TCATAGTATCAGCTAGAACGT  
25-12 TCTGTAGTATTGTCGAAGATG  
25-13 GGCATCGAGCTGCCGCCGTAC  
25-14 TCATTCGAGCAGCATTTGGCTA  
25-15 TTTTTTTTTTCCGGAGGGCCC

## Motif 4.1X

| Name | Sequence                                    |
|------|---------------------------------------------|
| 1-1  | ACTAAGCACTTACCAGTCGTC                       |
| 1-2  | TGTATAGTATCCAGCAGCTTA                       |
| 1-3  | CATCGTTACCGAGATTGATGG                       |
| 1-4  | GGACTAGACCGTTAACCAGTT                       |
| 1-5  | AATTCAAGCGTAGCCATCCTC                       |
| 1-6  | TGGAGTTTCACCTGATGTTTCG                      |
| 2-1  | AGTGCTTAGTTAAGCTGCTGGGCCTGCTGGATCGGCATGTAG  |
| 2-2  | ATACTATACACCATCAATCTCAGAAAGACTTTGACGATACTC  |
| 2-3  | GGTAACGATGAACTGGTTAACTCGCGCGAGCGACCCTCAGTG  |
| 2-4  | GGTCTAGTCCGAGGATGGCTAACTATTATTTATGGACCGAAA  |
| 2-5  | CGCTTGAATTGCAACATCAGGGTATGCTCCCTACTGAAAATAG |
| 2-6  | TGAAACTCCAGACGACTGGTACCTCAGCTTTTAAACCGTAGTC |
| 3-1  | TCCAGCAGGCGACTACGGTTATACCGTTTGTATTTCCTATGG  |
| 3-2  | AAGTCTTCTCTACATGCCGACTTTAACCTAGATGCTCATTC   |
| 3-3  | GCTCGCGGAGAGTATCGTCATGCTTAATACGAATCCTGACT   |
| 3-4  | AAATAATAGTCACTGAGGGTCTTCCCATCAAGTGGTTTGCCA  |
| 3-5  | GGGAGCATACTTTCGGTCCATTCCCGTACAGAGGTACGAGGT  |
| 3-6  | AAAGCTGAGGCTATTTTCAGTATAGCCATACTCGAAGGTCTTA |
| 4-1  | ACAAACGGTAGAATGAGCATCCAGGGCGTGAGCCCTTGAGTT  |
| 4-2  | TAGGTTAAAGAGTCAGGATTCAGACATAGCGTCCGCGATCAG  |
| 4-3  | GTATTAAGCATGGCAAACCACGCCAGTATGTAAATCCCGGGC  |
| 4-4  | TTGATGGGAAACCTCGTACCTCGGCTCGGCCAGTGGTCAAG   |
| 4-5  | CTGTACGGGATAAGACCTTCGGTGGTAGCCCACCACTCGCCT  |
| 4-6  | AGTATGGCTACCATAGAAAATACCCGACCACTTCCCTGGCCCT |
| 5-1  | TCACGCCCTGAGGGCCAGGGACCTACACTCACGGACTCCTAA  |
| 5-2  | CGCTATGTCTAACTCAAGGGCCAGTTACGTAAATCCGCGCAA  |
| 5-3  | ACATACTGGCCTGATCGCGGACCATAGACCATCGGACCCGCA  |
| 5-4  | GGCCGAGCCGGCCCGGATTTATTCTGCTGCTCAGATCAGA    |
| 5-5  | GGGCTACCACCTTGACCACTGCTTAGATTTATGTGTTTCGTAC |
| 5-6  | AGTGGTCGGGAGGCGAGTGGTATGAGTGGCACATCGCATTTA  |
| 6-1  | TGAGTGTAGGTTGCGCGGATTGACCCATGTGCGCACGACTCC  |
| 6-2  | TACGTAACCTGTGCGGGTCCGATCCCGTCTGAGTCTATTCATC |
| 6-3  | TGGTCTATGGTCTGATCTGAGAGTGCACCTCAAGCAAAGTTG  |
| 6-4  | CAGCAGGAATGTACGAACACATAGTGACACGGTGCGGAGCGT  |
| 6-5  | TAAATCTAAGTAAATGCGATGGGCACAACCCCTCCACAATGAA |
| 6-6  | TGCCACTCATTTAGGAGTCCGATTGCACTTTTTAATATAAAAT |
| 7-1  | CACATGGGTCATTTATATTAACCTCCGATAGACAGAAGCCAT  |
| 7-2  | TCAGACGGGAGGAGTCGTGCGGTTTCGCATTACGAGGTAAGTA |
| 7-3  | GAAGTGCCTGATGAATAGACAAACTGTTTAGGCTAGGATAT   |

7-4 CGTGTCACTACAACCTTTGCTTATAGGTCCCTGGGCCGCTCCT  
7-5 GGGTTGTGCCACGCTCCGCACGATACTTATTCTAGAAGCTAGC  
7-6 AAAGTGCAATTTTCATTGTGGAATCCGGTTTCCATTTGTTCTA  
8-1 CTATCGGAGGTACTTACCTCGAGAAAGGGCGATTCCGATCGC  
8-2 TAATGCGAACATATCCTAGCCACCTTTCAGCATGCAAAGTTC  
8-3 TAAACAGTTTAGGAGGGCCAGAACTCCACCTGCCACGTGA  
8-4 CAGGACCTATGCTAGTTCTAGTAGCTAGTCGTAGAATCTACT  
8-5 AATAAGTATCTAGAACAAATGGTGGCTTGTACCCGGAATGTG  
8-6 GAAACCGGATATGGCTTCTGTTTCGACCGTGTGCGCTATTCCA  
9-1 CGCCCTTTCTTGAATAGGCGATAGAATTC AACCTTTATGT  
9-2 GCTGAAAGGTGCGATCGGAATGACGTAAACGACAAAGTAAG  
9-3 GTGGAGTTCTGAACTTTGCATAGTGAAATGTTGGAACATTGG  
9-4 CGACTAGCTATCACGTGGCAGGTGCACAGAATGAGCGGAAAT  
9-5 TACAAGCCACAGTAGATTCTATTTGATCATCGATGCCCGCAG  
9-6 ACACGGTCGACACATTCCGGGAACCAAGTCTGTTTAAAGTAC  
10-1 TGAATTCTATCCTTACTTTGTTTCGAAAAGTAATCCCATTGTC  
10-2 CGTTTACGTCCCAATGTTCCACGACTGTGACGACAATTGTGCG  
10-3 ACATTTCACTATTTCCGCTCAGGCTATGGCATGCAACGATAC  
10-4 TTCTGTGCACCTGCGGGCATCCATCCAGTGCCGTATGATACT  
10-5 GATGATCAAAGTACTTTAAACTCATCCCTGTTCAACTCTGCA  
10-6 AGACTTGGTTACATAAAGGGTGCAAGACATCGGGCGCGATGA  
11-1 TACTTTTGAATCATCGCGCCC  
11-2 GTCACAGTCGGACAATGGGAT  
11-3 TGCCATAGCCCGACAATTGTC  
11-4 GCACTGGATGGTATCGTTGCA  
11-5 ACAGGGATGAAGTATCATAACG  
11-6 GATGTCTTGCTGCAGAGTTGA

## Motif 4.2X

| Name | Sequence                                   |
|------|--------------------------------------------|
| 1-1  | TTCAGCCTTCAACGAACACC                       |
| 1-2  | AAACACGGCAAAGGTCGAAG                       |
| 1-3  | CCATGTACCAACCTGACAAG                       |
| 1-4  | GTCTCCTGGCCCAGACGAAT                       |
| 1-5  | CATTTGGTCTCCGGATAAGG                       |
| 1-6  | ACGAACTTCGGGATTGACTA                       |
| 2-1  | GAAGGCTGAACTTCGACCTTCTTGTTCAGCACGGGACAGG   |
| 2-2  | TGCCGTGTTTCTTGTTCAGGTTTCAGACGACGGTCCAAAGCA |
| 2-3  | TGGTACATGGATTTCGTCTGGTGGCCTTCTGTCCGAGATCA  |
| 2-4  | GCCAGGAGACCCTTATCCGGGCAACCCGATGCGGGCGGAA   |
| 2-5  | AGACCAAATGTAGTCAATCCCAATCGGCCCTCGGAACGAC   |
| 2-6  | CGAAGTTCGTGGTGTTCGTTGCGTCGTCTTTTCCACAAA    |
| 3-1  | GCTGAACAAGTTTGTGGAAAAGCTTAAGACAAATAGCTAAC  |
| 3-2  | CGTCGTCTGACCTGTCCCGTCGCCACTTGTCTTCTAACGA   |
| 3-3  | CAGAAGGCCATGCTTTGGACTGGTTAATGGATCATACGTC   |
| 3-4  | ATCGGGTTGCTGATCTCGGAGGTACCGACCCAGCGAGCA    |
| 3-5  | GGGCCGATTGTTCCGCCCGCTCAACAGGCCGTAAAACGCAA  |
| 3-6  | AAGACGACGCGTCGTTCCGACATGTACTCCAATCATCCGC   |
| 4-1  | TGTCTTAAGCTCGTTAGAAATATGAGAGAGTATCCTTATG   |
| 4-2  | ACAAGTGGCGGACGTATGATAGCATCTGAGGACGCCACCA   |
| 4-3  | CCATTAACCATGCTCGCTGGGAGTCCCTCGAACAAAAGAGA  |
| 4-4  | GTGCGGTACCTTGCGTTTACGTGCGGTGATGCAGGACACA   |
| 4-5  | GGCCTGTTGAGCGGATGATTACATGCACTCTCGGTCATGT   |
| 4-6  | GGAGTACATGGTTAGCTATTTCCCAACCGCGAAATATGA    |
| 5-1  | CTCTCTCATATCATATTTTCTCTCTAGGCGCTTCTGGGTG   |
| 5-2  | CTCAGATGCTCATAAGGATAGGTCCGTGTAAAGCATGAAG   |
| 5-3  | CGAGGGACTCTGGTGGCGTCGTTCTCCAGTCTGGCACACA   |
| 5-4  | ATCACCGCACTCTCTTTGTTCTCGACCGGCTTCTTTGTA    |
| 5-5  | GAGTGCATGTTGTGTCTCTGCTCTTGTCTGTCCTTGGGACGT |
| 5-6  | GCGGTTGGGAACATGACCGAGAAGATTCGGGTCCCTGTAT   |
| 6-1  | CGCCTAGAGACTTCATGCTTTTAGGAGCGTTTCTAAAGGAG  |
| 6-2  | TACACGGACCTGTGTGCCAGCAGTAATACGTTATGGCGGT   |
| 6-3  | ACTGGAGAACTACAAAGAAATCTAAGGCAGTTACAGTGCA   |
| 6-4  | GCCGGTGCAGACGTCCCAAGAGGGAAAAGGCAAACCACCCT  |
| 6-5  | GACGACAAGAATACAGGGACCCCTCAACCCCTCACAAGTGT  |
| 6-6  | CCGAATCTTCCACCCAGAAGGCTTTATCTTCCCTTCAGGG   |
| 7-1  | AACGCTCCTACCCTGAAGGGCCTAATTCTCTTTAAACACC   |
| 7-2  | CGTATTACTGCTCCTTTAGACCTCCCTTTAATGTGGATTT   |
| 7-3  | CTGCCTTAGAACCGCCATAAAGCTTATTCCCTTGCGAAGGC  |

7-4 GCCTTTCCCTTGCACTGTAAGACCCACTTCGCCAAAGTAG  
7-5 AGGGTTGAGGAGGGTGGTTTTAAATACAGATCTCAGACTGG  
7-6 AAGATAAAGCACACTTGTGAACTCCGATCTTCTTGAAGGG  
8-1 GAGAATTAGGAAATCCACATCTAGTGCTAAGTTAAACAGT  
8-2 TAAAGGGAGGGCCTTCGCAACGGCCATCCCGGAGGTCCAC  
8-3 GGAATAAGCTCTACTTTGGCTACCGCAATCTCATGAGCCG  
8-4 GAAGTGGGTCCCAGTCTGAGCTGTGAACATATAGTCCCTCG  
8-5 ATCTGTATTTCCCTTCAAGAGGAAGGTTTGTTCGCTCCTA  
8-6 AGATCGGAGTGGTGTTTAAACGGGCTGAATTCCCGGCTTT  
9-1 TTAGCACTAGAAAGCCGGGAGCGTCGTTGTGAAAGACTAT  
9-2 GGGATGGCCGACTGTTTAACCAGGGCAGTTAGAAGCCAGC  
9-3 GATTGCGGTAGTGGACCTCCTCTAGGGCGTTTAACAAGCG  
9-4 ATGTTACAGCGGCTCATGACTGTGACCACTGGACAGTAT  
9-5 CAAACCTTCCCGAGGACTATTAAGGAGTGCAGGCTGCCTT  
9-6 ATTCAGCCCCTAGGAGCGAACCTTGGATCCCACACCAAAT  
10-1 ACAACGACGCGCTGGCTTCTTTGTGAGCGATGCAGCGATC  
10-2 AACTGCCCTGCGCTTGTTAATCGCAATTGGCAGTCCCATA  
10-3 ACGCCCTAGAATACTGTCCAATGGGATGAAGCGTCCCATT  
10-4 GTGGTACAGAAGGCAGCCTGCCTACTCGCACGACAAAGT  
10-5 GCACTCCTTAATTTGGTGTGCATCGTCTGCAGACGAAGCG  
10-6 GGATCCAAGGATAGTCTTTCTTCGCTCACTGCGATGCTCA  
11-1 TCGCTCACAATGAGCATCGC  
11-2 CCAATTGCGAGATCGCTGCA  
11-3 TTCATCCCATTATGGGACTG  
11-4 GCGAGTAGGCAATGGGACGC  
11-5 GCAGACGATGACTTTGTTCGT  
11-6 AGTGAGCGAACGCTTCGTCT
